# Supplementary material for: Formamidation of a wide range of substituted and functionalized amines with CO and a base
Source: Royal Society of Chemistry journal article supplement (doi:10.1039/d2qo01312f), 2022-01-01

## Supporting Information

### Formamidation of a Wide Range of Substituted and Functionalized Amines with CO and a Base

Chunyan Zhang,<sup>a,b,\*</sup> Yushuang Zhang,<sup>a</sup> Qianqian Liang,<sup>a,d</sup> Guohui Zhang,<sup>a</sup> Wei Yang,<sup>a</sup> Nanwen Li,<sup>a</sup> Guiping Qin<sup>c,\*</sup> and Guoying Zhang<sup>a,\*</sup>

<sup>a</sup> State Key Laboratory of Coal Conversion, Institute of Coal Chemistry, Chinese Academy of Sciences, Taiyuan, 030001, P. R. China. Email: zhanggy@sxicc.ac.cn.

<sup>b</sup> Taiyuan University of Technology, Taiyuan, 030001, P. R. China. Email: qustzcy@163.com.

<sup>c</sup> Faculty of Science, Kunming University of Science and Technology, Kunming, 650500, P. R. China. Email: qin-guiping@kust.edu.cn.

<sup>d</sup> University of Chinese Academy of Sciences, Beijing 100049, P. R. China.

E-mail: [zhanggy@sxicc.ac.cn](mailto:zhanggy@sxicc.ac.cn);

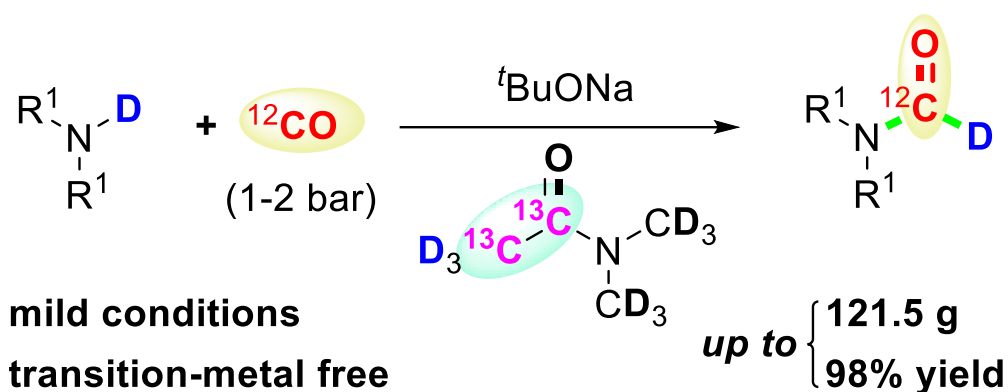

## Table of contents

|    |                                                       |     |
|----|-------------------------------------------------------|-----|
| 1  | General .....                                         | S3  |
| 2  | Screening of reaction parameters .....                | S4  |
| 3  | Experimental characterization data for products ..... | S10 |
| 4  | Characterization data .....                           | S11 |
| 5  | Control experiments .....                             | S29 |
| 6  | Mechanism investigations.....                         | S32 |
| 7  | Deuterium-labeled investigations.....                 | S35 |
| 8  | Application and further transformation.....           | S35 |
| 9  | References.....                                       | S46 |
| 10 | NMR Spectra.....                                      | S49 |

## 1. General

**Experimental:** All reactions and manipulations with air sensitive compounds being present were performed under dry argon (Ar 5.0) or nitrogen (N<sub>2</sub> 5.0), using Schlenk and glove box techniques. Deuterated solvents were bought from Cambridge Isotope Laboratories, distilled accordingly, and stored over molecular sieves (3 Å). Other chemicals were purchased from commercial vendors and used without further purification. NMR spectra were collected on a Varian INOVA 300 and 400 MHz spectrometer. Chemical shifts ( $\delta$ ) are reported in ppm relative to residual solvent signal. Coupling constants ( $J$ ) are given in Hz (coupling patterns: s: singlet, s\_br: broad singlet, d: doublet, t: triplet, q: quartet, m: multiplet). GC analyses were carried out using an Agilent Technologies 6890N system equipped with a Machinery-Nagel (MN) Optima 5 HT column (30 m, 320  $\mu$ m, 0.25  $\mu$ m) or an Agilent Technologies 6850 system equipped with a MN Optima 17 column (30 m, 320  $\mu$ m, 0.25  $\mu$ m). GC/MS analyses were carried out on an Agilent 7890A/MSD 5975C system equipped with a HP-5MS column (30 m, 320  $\mu$ m, 0.25  $\mu$ m). High resolution mass spectra (HRMS) were recorded on Bruker MicroTOF-QII mass (ESI). MN silica gel 60 (0.040 – 0.063 mm particle size) was used for flash column chromatography.

## 2. Screening of reaction parameters

Closed system:

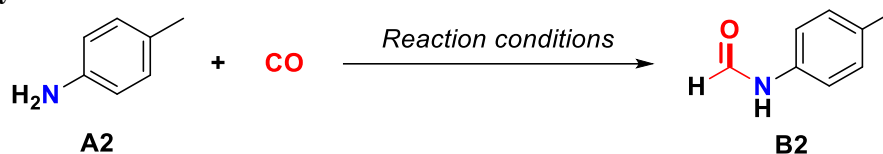

Using a nitrogen-filled glove box, an oven-dried pressure tube was charged with a magnetic stirring bar, base, amines (**A2**), additive and solvent. Then the glass tube was placed in an autoclave which was closed tightly and removed from the glove box. Then the autoclave was purged and charged with CO and immersed into a pre-heated metal bath (design temperature) for design time. After the reaction was finished, the autoclave was cooled to room temperature and the pressure was carefully released under well ventilated fume hood. Sat. aq.  $\text{NH}_4\text{Cl}$  (10 mL) was then added and the mixture was extracted with ethyl acetate or DCM ( $3 \times 10$  mL) and the combined organics were washed with brine (10 mL), dried over  $\text{Na}_2\text{SO}_4$ . A small aliquot of the organic phase was analyzed by GC and GC-MS to monitor product formation. Then the solvent was evaporated under reduced pressure and the residue was purified by flash column chromatography (petroleum ether/ethyl acetate = 10:1 – 1:1) on silica gel to give the product **B2**.

| Entry    | Parameter                           |
|----------|-------------------------------------|
| Table S1 | The difference of base screening    |
| Table S2 | The loading of base screening       |
| Table S3 | The difference of solvent screening |
| Table S4 | The loading of solvent screening    |
| Table S5 | The pressure screening              |
| Table S6 | Reaction temperature screening      |
| Table S7 | Reaction time screening             |

Table S1: The difference of base screening <sup>[a]</sup>

Cc1ccc(N)cc1 (A2) + CO  $\xrightarrow{\text{Reaction conditions}}$  Cc1ccc(NC=O)cc1 (B2)

| Entry     | Base (1.0 equiv)                | <b>B2 (%)</b> |
|-----------|---------------------------------|---------------|
| 1         | LiOH                            | 0             |
| 2         | NaOH                            | 0             |
| 3         | KOH                             | 0             |
| 4         | CsOH                            | 0             |
| 5         | Li <sub>2</sub> CO <sub>3</sub> | 0             |
| 6         | Na <sub>2</sub> CO <sub>3</sub> | 0             |
| 7         | K <sub>2</sub> CO <sub>3</sub>  | 0             |
| 8         | Cs <sub>2</sub> CO <sub>3</sub> | 0             |
| 9         | <sup>t</sup> BuOLi              | <5            |
| <b>10</b> | <b><sup>t</sup>BuONa</b>        | <b>68</b>     |
| 11        | <sup>t</sup> BuOK               | 67            |
| 12        | <sup>t</sup> BuOCs              | <5            |
| 13        | pyridine                        | <5            |
| 14        | TEA                             | 0             |
| 15        | TBD                             | 0             |
| 16        | DBU                             | 0             |
| 17        | <sup>t</sup> BuLi               | 0             |
| 18        | NaH                             | <5            |
| 19        | NaNH <sub>2</sub>               | <5            |
| 20        | KH                              | <5            |

<sup>[a]</sup> Reaction conditions: base (1.0 mmol), **A2** (1.0 mmol, 110 μL), DMAc (2.0 mL), CO (1 bar), 60 °C, 6 h. Yield of **B2** determined by GC-analysis using *n*-dodecane (100 μL) as internal standard.

Table S2: The loading of base screening <sup>[a]</sup>

Cc1ccc(N)cc1 (A2) + CO  $\xrightarrow{\text{Reaction conditions}}$  Cc1ccc(NC=O)cc1 (B2)

| Entry     | <sup>t</sup> BuONa (mmol) | <b>B2</b> (%) |
|-----------|---------------------------|---------------|
| 1         | 0                         | 0             |
| 2         | 0.1                       | 6             |
| 3         | 0.2                       | 13            |
| 4         | 0.3                       | 20            |
| 5         | 0.4                       | 26            |
| 6         | 0.5                       | 29            |
| 7         | 0.6                       | 35            |
| 8         | 0.7                       | 48            |
| 9         | 0.8                       | 56            |
| 10        | 0.9                       | 63            |
| <b>11</b> | <b>1.0</b>                | <b>69</b>     |
| 12        | 1.1                       | 69            |
| 13        | 1.2                       | 68            |
| 14        | 1.3                       | 68            |
| 15        | 1.4                       | 67            |
| 16        | 1.5                       | 68            |
| 17        | 2.0                       | 65            |
| 18        | 2.5                       | 60            |
| 19        | 3.0                       | 53            |

<sup>[a]</sup> Reaction conditions: <sup>t</sup>BuONa (x mmol), **A2** (1.0 mmol, 110 μL), DMAc (2.0 mL), CO (1 bar), 60 °C, 6 h. Yield of **B2** determined by GC-analysis using *n*-dodecane (100 μL) as internal standard.

Table S3: The difference of solvent screening <sup>[a]</sup>

Cc1ccc(N)cc1 (A2) + CO  $\xrightarrow{\text{Reaction conditions}}$  Cc1ccc(NC=O)cc1 (B2)

| Entry     | Solvent (2 mL)    | B2 (%)    |
|-----------|-------------------|-----------|
| 1         | nitrobenzene      | 0         |
| 2         | chlorobenzene     | 0         |
| 3         | toluene           | 0         |
| 4         | mesitylene        | 0         |
| 5         | benzotrifluoride  | 0         |
| 6         | THF               | <5        |
| 7         | 1,4-dioxane       | <5        |
| 8         | DME               | <5        |
| 9         | anisole           | <5        |
| 10        | pyridine          | 0         |
| 11        | Et <sub>3</sub> N | 0         |
| 12        | methanol          | 0         |
| 13        | ethanol           | 0         |
| 14        | <i>i</i> PrOH     | 0         |
| 15        | <i>t</i> BuOH     | 0         |
| 16        | <i>t</i> AmOH     | 0         |
| 17        | DCM               | 0         |
| 18        | DMSO              | 21        |
| 19        | DMF               | 68        |
| <b>20</b> | <b>DMAc</b>       | <b>69</b> |
| 21        | NMP               | 50        |
| 22        | HMPA              | <5        |

<sup>[a]</sup> Reaction conditions: *t*BuONa (1.0 mmol), **A2** (1.0 mmol, 110  $\mu$ L), solvent (2.0 mL), CO (1 bar), 60  $^{\circ}$ C, 6 h. Yield of **B2** determined by GC-analysis using *n*-dodecane (100  $\mu$ L) as internal standard.

Table S4: The loading of solvent screening <sup>[a]</sup>

CC1=CC=C(CN)C=C1 + **CO**  $\xrightarrow{\text{Reaction conditions}}$  CC1=CC=C(C(=O)N)C=C1

**A2**  **B2**

| Entry    | DMAc (ml)  | <b>B2</b> (%) |
|----------|------------|---------------|
| 1        | -          | 67            |
| 2        | 0.5        | 72            |
| <b>3</b> | <b>1.0</b> | <b>73</b>     |
| 4        | 1.5        | 72            |
| 5        | 2.0        | 73            |
| 6        | 2.5        | 73            |
| 7        | 3.0        | 74            |

<sup>[a]</sup> Reaction conditions: <sup>t</sup>BuONa (1.0 mmol), **A2** (1.0 mmol, 110  $\mu$ L), DMAc (x mL), CO (1 bar), 60  $^{\circ}$ C, 6 h. Yield of **B2** determined by GC-analysis using *n*-dodecane (100  $\mu$ L) as internal standard.

Table S5: The pressure screening <sup>[a]</sup>

CC1=CC=C(CN)C=C1 + **CO**  $\xrightarrow{\text{Reaction conditions}}$  CC1=CC=C(C(=O)N)C=C1

**A2**  **B2**

| Entry    | P [bar]  | <b>B2</b> (%) |
|----------|----------|---------------|
| 1        | 1        | 53            |
| <b>2</b> | <b>2</b> | <b>76</b>     |
| 3        | 3        | 76            |
| 4        | 4        | 75            |
| 5        | 6        | 76            |
| 6        | 8        | 75            |
| 7        | 10       | 76            |
| 8        | 20       | 75            |

<sup>[a]</sup> Reaction conditions: <sup>t</sup>BuONa (1.0 mmol), **A2** (1.0 mmol, 110  $\mu$ L), DMAc (1.0 mL), CO (x bar), 60  $^{\circ}$ C, 6 h. Yield of **B2** determined by GC-analysis using *n*-dodecane (100  $\mu$ L) as internal standard.

Table S6: Reaction temperature screening <sup>[a]</sup>

Cc1ccc(N)cc1 (A2) + CO  $\xrightarrow{\text{Reaction conditions}}$  Cc1ccc(NC=O)cc1 (B2)

| Entry    | T [°C]     | B2 (%)    |
|----------|------------|-----------|
| 1        | RT         | 0         |
| 2        | 40         | 36        |
| 3        | 60         | 76        |
| 4        | 80         | 81        |
| <b>5</b> | <b>100</b> | <b>89</b> |
| 6        | 120        | 81        |
| 7        | 140        | 80        |

<sup>[a]</sup> Reaction conditions: <sup>t</sup>BuONa (1.0 mmol), **A2** (1.0 mmol, 110  $\mu$ L), DMAc (1.0 mL), CO (2 bar), T, 6 h. Yield of **B2** determined by GC-analysis using *n*-dodecane (100  $\mu$ L) as internal standard.

Table S7: Reaction time screening <sup>[a]</sup>

Cc1ccc(N)cc1 (A2) + CO  $\xrightarrow{\text{Reaction conditions}}$  Cc1ccc(NC=O)cc1 (B2)

| Entry    | t [h]     | B2 (%)                       |
|----------|-----------|------------------------------|
| 1        | 3         | 31                           |
| 2        | 6         | 89                           |
| 3        | 9         | 95                           |
| <b>4</b> | <b>12</b> | <b>99 (92)<sup>[b]</sup></b> |
| 5        | 15        | 98                           |

<sup>[a]</sup> Reaction conditions: <sup>t</sup>BuONa (1.0 mmol), **A2** (1.0 mmol, 110  $\mu$ L), DMAc (1.0 mL), CO (2 bar), 60 °C, x h. Yield of **B2** determined by GC-analysis using *n*-dodecane (100  $\mu$ L) as internal standard. <sup>[b]</sup> Isolated yield.

### 3. Experimental characterization data for products

Closed system:

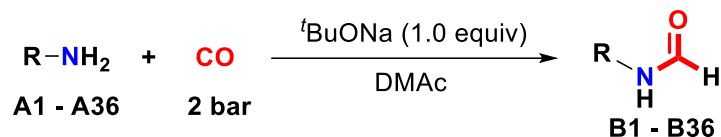

Using a nitrogen-filled glove box, an oven-dried pressure tube (50 mL) was charged with a magnetic stirring bar, <sup>t</sup>BuONa (961 mg, 10.0 mmol), amines **A** (10.0 mmol), and DMAc (10.0 mL). Then the glass tube was placed in an autoclave which was closed tightly and removed from the glove box. Then the autoclave was purged and charged with CO (2 bar) and immersed into a pre-heated metal bath (100 °C) for 12 hours. After the reaction was finished, the autoclave was cooled to room temperature and the pressure was carefully released under well ventilated fume hood. Sat. aq. NH<sub>4</sub>Cl (50 mL) was then added and the mixture was extracted with ethyl acetate or DCM (3 × 50 mL) and the combined organics were washed with brine (50 mL), dried over Na<sub>2</sub>SO<sub>4</sub>. A small aliquot of the organic phase was analyzed by GC and GC-MS to monitor product formation. Then the solvent was evaporated under reduced pressure and the residue was purified by flash column chromatography (petroleum ether/ethyl acetate = 10:1 – 1:1, DCM 2%, Et<sub>3</sub>N 2%) on silica gel to give the corresponding products **B**.

#### 4. Characterization data

##### *N*-phenylformamide<sup>1</sup>

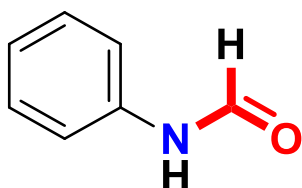

##### **B1:**

The title compound was prepared according to the general procedure and purified by column chromatography to give a white solid, 1.1379 gram, 94% yield.

**<sup>1</sup>H NMR** (400 MHz, CDCl<sub>3</sub>) δ 9.04 (br, 0.5H), 8.70 (d, *J* = 11.2 Hz, 0.5H), 8.33 (s, 0.5H), 8.22 (br, 0.5H), 7.56 (d, *J* = 7.6 Hz, 1H), 7.36 – 7.29 (m, 2H), 7.23 – 6.98 (m, 2H).

**<sup>13</sup>C NMR** (101 MHz, CDCl<sub>3</sub>) δ 162.10, 158.60, 135.99, 135.79, 128.67, 128.00, 124.20, 123.71, 119.12, 119.10, 117.72.

**HRMS** (ESI) calcd. for C<sub>7</sub>H<sub>8</sub>NO [M+H]: 122.0606, found: 122.0607.

##### *N*-*p*-tolylformamide<sup>1</sup>

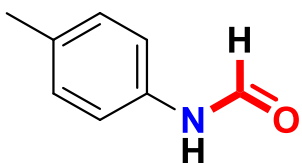

##### **B2:**

The title compound was prepared according to the general procedure and purified by column chromatography to give a white solid, 1.2967 gram, 96% yield.

**<sup>1</sup>H NMR** (400 MHz, CDCl<sub>3</sub>) δ 8.85 (d, *J* = 9.4 Hz, 1H), 8.62 (d, *J* = 11.4 Hz, 1H), 8.31 (d, *J* = 1.9 Hz, 1H), 7.92 (s, 1H), 7.50 – 7.35 (m, 1H), 7.13 (dd, *J* = 13.0, 8.2 Hz, 2H), 7.01 – 6.97 (m, 1H), 2.31 (d, *J* = 8.8 Hz, 3H).

**<sup>13</sup>C NMR** (101 MHz, CDCl<sub>3</sub>) δ 163.27, 159.39, 135.14, 134.45, 134.18, 130.23, 129.56, 120.15, 119.10, 20.90, 20.82.

**HRMS** (ESI) calcd. for C<sub>8</sub>H<sub>10</sub>NO [M+H]: 136.0762, found: 136.0764.

***N-m-tolylformamide*<sup>1</sup>**

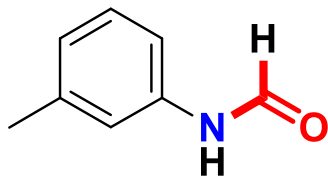

**B3:**

The title compound was prepared according to the general procedure and purified by column chromatography to give a white solid, 1.2156 gram, 93% yield.

**<sup>1</sup>H NMR** (400 MHz, CDCl<sub>3</sub>)  $\delta$  8.96 – 8.76 (m, 1H), 8.69 (d,  $J$  = 11.3 Hz, 1H), 8.33 (d,  $J$  = 2.0 Hz, 1H), 7.88 (s, 1H), 7.40 (t,  $J$  = 1.8 Hz, 1H), 7.36 – 7.28 (m, 1H), 7.29 – 7.14 (m, 2H), 6.99 – 6.89 (m, 4H), 2.33 (d,  $J$  = 9.8 Hz, 6H).

**<sup>13</sup>C NMR** (101 MHz, CDCl<sub>3</sub>)  $\delta$  163.09, 159.42, 139.84, 139.04, 136.93, 136.76, 129.53, 128.89, 126.04, 125.58, 120.72, 119.48, 117.16, 115.72, 21.46, 21.40.

**HRMS** (ESI) calcd. for C<sub>8</sub>H<sub>10</sub>NO [M+H]: 136.0762, found: 136.07625.

***N-o-tolylformamide*<sup>1</sup>**

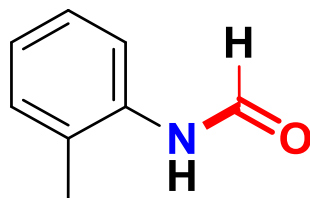

**B4:**

The title compound was prepared according to the general procedure and purified by column chromatography to give a white solid, 1.2156 gram, 90% yield.

**<sup>1</sup>H NMR** (400 MHz, CDCl<sub>3</sub>)  $\delta$  8.46 (d,  $J$  = 11.2 Hz, 1H), 8.36 (d,  $J$  = 1.8 Hz, 1H), 8.09 – 7.87 (m, 1H), 7.85 – 7.78 (m, 1H), 7.21 – 6.95 (m, 4H), 2.22 (d,  $J$  = 11.8 Hz, 2H).

**<sup>13</sup>C NMR** (101 MHz, CDCl<sub>3</sub>)  $\delta$  162.40, 158.15, 134.00, 133.59, 130.21, 129.54, 128.71, 127.57, 126.09, 125.81, 125.01, 124.49, 122.01, 119.65, 16.69.

**HRMS** (ESI) calcd. for C<sub>8</sub>H<sub>10</sub>NO [M+H]: 136.0762, found: 136.0761.

***N*-(4-(*tert*-butyl)phenyl)formamide<sup>2</sup>**

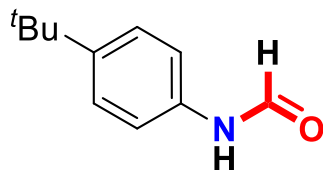

**B5:**

The title compound was prepared according to the general procedure and purified by column chromatography to give a white solid, 1.7358 gram, 98% yield.

**<sup>1</sup>H NMR** (400 MHz, DMSO-*d*<sub>6</sub>) δ 10.24 – 9.84 (m, 1H), 8.72 (d, *J* = 11.0 Hz, 1H), 8.24 (d, *J* = 1.9 Hz, 1H), 7.54 – 7.45 (m, 1H), 7.37 – 7.28 (m, 1H), 7.15 – 7.07 (m, 1H), 1.25 (s, 7H).

**<sup>13</sup>C NMR** (101 MHz, DMSO-*d*<sub>6</sub>) δ 162.94, 159.80, 146.54, 146.37, 136.16, 136.13, 126.49, 125.90, 119.36, 117.91, 40.60, 40.39, 40.18, 34.48, 34.44, 31.63.

**HRMS** (ESI) calcd. for C<sub>11</sub>H<sub>16</sub>NO [*M*+*H*]: 178.1232, found: 178.1231.

***N*-([1,1'-biphenyl]-2-yl)formamide<sup>3</sup>**

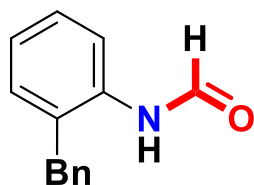

**B6:**

The title compound was prepared according to the general procedure and purified by column chromatography to give a white solid, 1.9210 gram, 91% yield.

**<sup>1</sup>H NMR** (400 MHz, CDCl<sub>3</sub>) δ 8.40 (d, *J* = 11.3 Hz, 1H), 8.22 (d, *J* = 1.7 Hz, 1H), 7.88 (d, *J* = 8.0 Hz, 1H), 7.71 (d, *J* = 10.6 Hz, 1H), 7.33 – 7.25 (m, 1H), 7.25 – 7.15 (m, 3H), 7.15 – 7.08 (m, 3H), 3.99 (d, *J* = 3.8 Hz, 2H).

**<sup>13</sup>C NMR** (101 MHz, CDCl<sub>3</sub>) δ 163.21, 159.31, 138.83, 138.61, 135.09, 134.68, 132.94, 131.44, 131.31, 131.00, 128.96, 128.52, 128.43, 127.90, 127.61, 126.77, 126.47, 125.81, 124.12, 122.00, 38.01, 37.82.

**HRMS** (ESI) calcd. for C<sub>14</sub>H<sub>14</sub>NO [*M*+*H*]: 212.1075, found: 212.1078.

***N*-(2-benzylphenyl)formamide<sup>4</sup>**

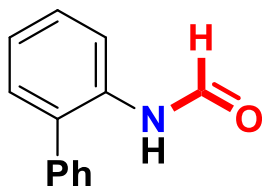

**B7:**

The title compound was prepared according to the general procedure and purified by column chromatography to give a white solid, 1.7540 gram, 89% yield.

**<sup>1</sup>H NMR** (400 MHz, CDCl<sub>3</sub>) δ 8.64 (d, *J* = 11.3 Hz, 1H), 8.36 (d, *J* = 8.2 Hz, 1H), 8.25 (d, *J* = 1.5 Hz, 1H), 7.71 – 6.93 (m, 8H).

**<sup>13</sup>C NMR** (101 MHz, CDCl<sub>3</sub>) δ 162.02, 158.99, 137.82, 137.36, 133.84, 133.78, 133.01, 132.01, 131.20, 130.18, 129.34, 129.20, 129.18, 128.75, 128.52, 128.16, 128.12, 125.37, 124.65, 121.57, 118.34.

**HRMS** (ESI) calcd. for C<sub>13</sub>H<sub>12</sub>NO [M+H]: 198.0919, found: 198.0918.

***N*-(4-methoxyphenyl)formamide<sup>1</sup>**

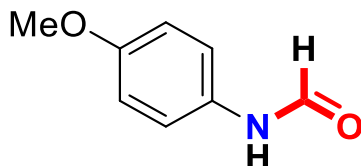

**B8:**

The title compound was prepared according to the general procedure and purified by column chromatography to give a white solid, 1.4804 gram, 98% yield.

**<sup>1</sup>H NMR** (400 MHz, CDCl<sub>3</sub>) δ 8.50 (d, *J* = 11.0 Hz, 1H), 8.28 (s, 1H), 7.84 (s, 1H), 7.45 (s, 1H), 7.03 (d, *J* = 8.6 Hz, 1H), 6.85 (dd, *J* = 14.0, 8.7 Hz, 2H), 3.78 (d, *J* = 7.4 Hz, 3H).

**<sup>13</sup>C NMR** (101 MHz, CDCl<sub>3</sub>) δ 162.32, 158.19, 156.54, 155.64, 129.02, 128.63, 120.84, 120.49, 113.85, 113.16, 54.52, 54.45.

**HRMS** (ESI) calcd. for C<sub>8</sub>H<sub>10</sub>NO<sub>2</sub> [M+H]: 152.0712, found: 152.0715.

***N*-(3-methoxyphenyl)formamide<sup>5</sup>**

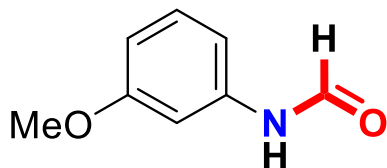

**B9:**

The title compound was prepared according to the general procedure and purified by column chromatography to give a white solid, 1.4502 gram, 96% yield.

**<sup>1</sup>H NMR** (400 MHz, DMSO-*d*<sub>6</sub>) δ 10.17 (s, 1H), 8.82 (d, *J* = 10.8 Hz, 1H), 8.28 (d, *J* = 1.7 Hz, 1H), 7.31 (t, *J* = 2.2 Hz, 1H), 7.26 – 7.17 (m, 1H), 7.14 – 7.12 (m, 1H), 6.81 – 6.75 (m, 1H), 6.66 – 6.64 (m, 1H), 3.73 (s, 2H).

**<sup>13</sup>C NMR** (101 MHz, DMSO-*d*<sub>6</sub>) δ 163.02, 160.57, 160.09, 160.01, 140.05, 139.82, 130.69, 130.12, 111.90, 110.10, 109.43, 105.55, 103.79, 55.51, 55.39.

**HRMS** (ESI) calcd. for C<sub>8</sub>H<sub>10</sub>NO<sub>2</sub> [M+H]: 152.0712, found: 152.0714.

***N*-(2-methoxyphenyl)formamide<sup>1</sup>**

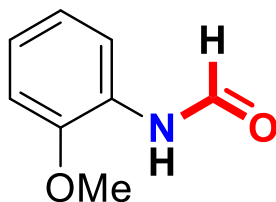

**B10:**

The title compound was prepared according to the general procedure and purified by column chromatography to give a white solid, 1.3746 gram, 91% yield.

**<sup>1</sup>H NMR** (400 MHz, CDCl<sub>3</sub>) δ 8.73 (d, *J* = 11.6 Hz, 1H), 8.45 (d, *J* = 1.9 Hz, 1H), 8.36 (dd, *J* = 8.0, 1.7 Hz, 1H), 8.03 – 7.53 (m, 1H), 7.19 (dd, *J* = 7.7, 1.6 Hz, 1H), 7.16 – 7.00 (m, 1H), 7.00 – 6.86 (m, 2H), 3.94 – 3.75 (m, 3H).

**<sup>13</sup>C NMR** (101 MHz, CDCl<sub>3</sub>) δ 168.24, 161.53, 158.85, 148.75, 147.82, 127.69, 126.75, 126.17, 125.25, 124.29, 123.62, 121.06, 120.45, 119.79, 116.69, 111.29, 110.07, 109.89, 55.72, 55.64.

**HRMS** (ESI) calcd. for C<sub>8</sub>H<sub>10</sub>NO<sub>2</sub> [M+H]: 152.0712, found: 152.0710.

***N*-(4-fluorophenyl)formamide<sup>1</sup>**

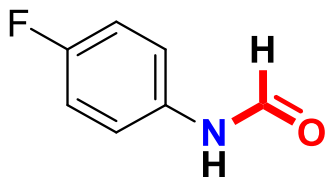

**B11:**

The title compound was prepared according to the general procedure and purified by column chromatography to give a white solid, 1.3487 gram, 97% yield.

**<sup>1</sup>H NMR** (400 MHz, DMSO-*d*<sub>6</sub>) δ 10.42 – 10.20 (m, 1H), 10.15 (d, *J* = 10.8 Hz, 1H), 8.83 – 8.62 (m, 1H), 8.29 – 8.26 (m, 1H), 7.66 – 7.59 (m, 1H), 7.25 – 7.19 (m, 1H), 7.19 – 7.10 (m, 2H).

**<sup>13</sup>C NMR** (101 MHz, DMSO-*d*<sub>6</sub>) δ 163.11, 160.42, 159.90, 159.78, 158.03, 157.40, 135.18, 135.15, 135.10, 135.08, 121.39, 121.31, 120.00, 119.92, 116.52, 116.29, 115.94, 115.72.

**<sup>19</sup>F NMR** (376 MHz, DMSO) δ -118.84, -119.76.

**HRMS** (ESI) calcd. for C<sub>7</sub>H<sub>7</sub>FNO [M+H]: 140.0512, found: 140.0511.

***N*-(4-chlorophenyl)formamide<sup>1</sup>**

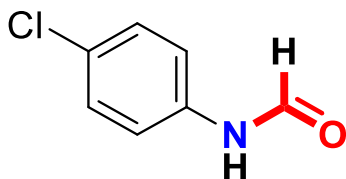

**B12:**

The title compound was prepared according to the general procedure and purified by column chromatography to give a white solid, 1.5346 gram, 99% yield.

**<sup>1</sup>H NMR** (400 MHz, DMSO-*d*<sub>6</sub>) δ 10.33 (s, 1H), 8.79 (d, *J* = 8.1 Hz, 1H), 8.29 (s, 1H), 7.66 – 7.59 (m, 1H), 7.41 – 7.33 (m, 2H), 7.26 – 7.19 (m, 1H).

**<sup>13</sup>C NMR** (101 MHz, DMSO-*d*<sub>6</sub>) δ 162.99, 160.18, 137.86, 137.61, 129.69, 129.22, 127.93, 127.62, 121.17, 119.44.

**HRMS** (ESI) calcd. for C<sub>7</sub>H<sub>7</sub>ClNO [M+H]: 156.0216, found: 156.0217.

***N*-(3-chlorophenyl)formamide<sup>1</sup>**

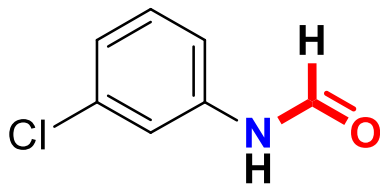

**B13:**

The title compound was prepared according to the general procedure and purified by column chromatography to give a white solid, 1.4571 gram 94% yield.

**<sup>1</sup>H NMR** (400 MHz, CDCl<sub>3</sub>) δ 8.71 (d, *J* = 11.1 Hz, 1H), 8.64 (s, 1H), 8.38 (d, *J* = 1.4 Hz, 1H), 7.66 (t, *J* = 1.9 Hz, 1H), 7.39 (dd, *J* = 8.1, 1.0 Hz, 1H), 7.30 – 7.22 (m, 1H), 7.20 – 7.14 (m, 1H), 7.14 – 7.08 (m, 1H), 7.00 (dd, *J* = 8.0, 1.3 Hz, 1H).

**<sup>13</sup>C NMR** (101 MHz, CDCl<sub>3</sub>) δ 162.54, 159.23, 138.00, 137.97, 135.46, 134.74, 130.85, 130.14, 125.35, 124.93, 120.14, 118.77, 117.96, 116.70.

**HRMS** (ESI) calcd. for C<sub>7</sub>H<sub>7</sub>ClNO [M+H]: 156.0216, found: 156.0212.

***N*-(2-chlorophenyl)formamide<sup>7</sup>**

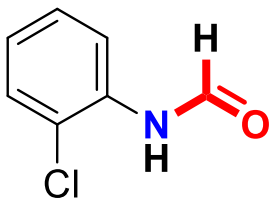

**B14:**

The title compound was prepared according to the general procedure and purified by column chromatography to give a white solid, 1.3951 gram, 90% yield.

**<sup>1</sup>H NMR** (400 MHz, CDCl<sub>3</sub>) δ 8.72 (d, *J* = 11.2 Hz, 1H), 8.51 (d, *J* = 1.0 Hz, 1H), 8.41 (dd, *J* = 8.3, 1.2 Hz, 1H), 7.76 (s, 1H), 7.44 (d, *J* = 8.0 Hz, 1H), 7.39 (dd, *J* = 8.0, 1.3 Hz, 1H), 7.33 – 7.22 (m, 1H), 7.16 – 7.12 (m, 1H), 7.10 – 7.06 (m, 1H).

**<sup>13</sup>C NMR** (101 MHz, CDCl<sub>3</sub>) δ 161.55, 159.01, 158.93, 133.70, 130.32, 129.21, 129.13, 128.03, 127.89, 127.81, 125.96, 125.23, 125.15, 122.58, 122.09, 122.01, 118.78, 118.70.

**HRMS** (ESI) calcd. for C<sub>7</sub>H<sub>7</sub>ClNO [M+H]: 156.0216, found: 156.0218.

***N*-(4-bromophenyl)formamide<sup>1</sup>**

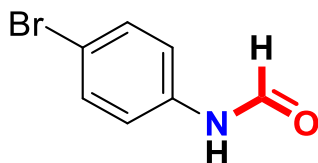

**B15:**

The title compound was prepared according to the general procedure and purified by column chromatography to give a white solid, 1.9100 gram, 96% yield.

**<sup>1</sup>H NMR** (400 MHz, CDCl<sub>3</sub>) δ 8.66 (d, *J* = 11.3 Hz, 1H), 8.39 (d, *J* = 1.4 Hz, 1H), 7.99 (s, 1H), 7.54 – 7.39 (m, 2H), 7.29 (s, 1H), 6.98 (d, *J* = 8.7 Hz, 1H).

**<sup>13</sup>C NMR** (101 MHz, CDCl<sub>3</sub>) δ 162.07, 158.79, 135.83, 135.69, 132.81, 132.10, 121.44, 120.36, 118.29, 117.48.

**HRMS** (ESI) calcd. for C<sub>7</sub>H<sub>7</sub>BrNO [M+H]: 199.9711, found: 199.9715.

***N*-(2-bromophenyl)formamide<sup>1</sup>**

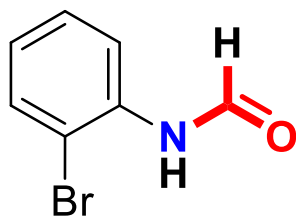

**B16:**

The title compound was prepared according to the general procedure and purified by column chromatography to give a white solid, 1.7707 gram, 89% yield.

**<sup>1</sup>H NMR** (400 MHz, CDCl<sub>3</sub>) δ 8.71 (d, *J* = 11.1 Hz, 1H), 8.50 (d, *J* = 1.8 Hz, 1H), 8.39 (dd, *J* = 8.3, 1.6 Hz, 1H), 7.87 – 7.50 (m, 1H), 7.36 – 7.24 (m, 1H), 7.12 – 6.96 (m, 1H).

**<sup>13</sup>C NMR** (101 MHz, CDCl<sub>3</sub>) δ 161.54, 158.85, 135.03, 134.79, 133.52, 132.37, 128.72, 128.49, 126.39, 125.67, 122.24, 118.93, 114.45, 113.00.

**HRMS** (ESI) calcd. for C<sub>7</sub>H<sub>7</sub>BrNO [M+H]: 199.9711, found: 199.9714.

***N*-(4-iodophenyl)formamide<sup>6</sup>**

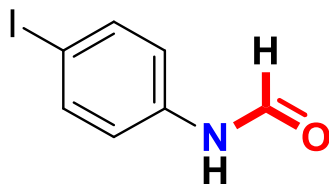

**B17:**

The title compound was prepared according to the general procedure and purified by column chromatography to give a white solid, 2.2966 gram, 93% yield.

**<sup>1</sup>H NMR** (400 MHz, CDCl<sub>3</sub>) δ 8.67 (d, *J* = 11.3 Hz, 1H), 8.39 (d, *J* = 1.7 Hz, 1H), 8.19 (d, *J* = 11.2 Hz, 1H), 7.70 – 7.55 (m, 1H), 7.43 – 7.29 (m, 1H), 6.92 – 6.70 (m, 1H).

**<sup>13</sup>C NMR** (101 MHz, CDCl<sub>3</sub>) δ 162.13, 158.90, 138.74, 138.07, 136.56, 136.46, 121.75, 120.51, 88.71, 88.16.

**HRMS** (ESI) calcd. for C<sub>7</sub>H<sub>7</sub>INO [M+H]: 247.9572, found: 247.9574.

***N*-(2-iodophenyl)formamide<sup>5</sup>**

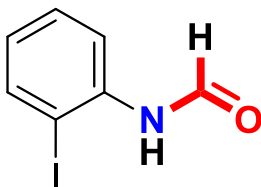

**B18:**

The title compound was prepared according to the general procedure and purified by column chromatography to give a white solid, 2.0991 gram, 85% yield.

**<sup>1</sup>H NMR** (400 MHz, DMSO-*d*<sub>6</sub>) δ 9.57 (s, 1H), 8.35 (s, 1H), 7.88 (dd, *J* = 7.9, 1.1 Hz, 1H), 7.79 (dd, *J* = 8.1, 1.2 Hz, 1H), 7.45 – 7.31 (m, 1H), 7.16 – 6.80 (m, 1H).

**<sup>13</sup>C NMR** (101 MHz, DMSO-*d*<sub>6</sub>) δ 164.16, 160.78, 139.96, 139.62, 138.94, 129.86, 129.16, 128.27, 127.41, 125.08, 95.54, 93.16.

**HRMS** (ESI) calcd. for C<sub>7</sub>H<sub>7</sub>INO [M+H]: 247.9572, found: 247.9575.

***N*-(4-(trifluoromethyl)phenyl)formamide<sup>4</sup>**

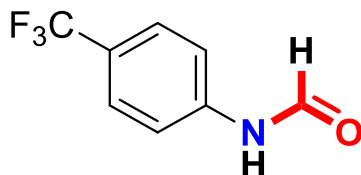

**B19:**

The title compound was prepared according to the general procedure and purified by column chromatography to give a white solid, 1.8148 gram, 96% yield.

**<sup>1</sup>H NMR** (400 MHz, DMSO-*d*<sub>6</sub>) δ 10.49 – 10.06 (m, 1H), 8.81 (s, 1H), 8.31 (s, 1H), 7.74 – 7.67 (m, 2H), 7.31 (t, *J* = 4.2 Hz, 2H).

**<sup>13</sup>C NMR** (101 MHz, DMSO-*d*<sub>6</sub>) δ 168.96, 163.10, 160.21, 144.64, 144.22, 144.20, 138.95, 138.16, 137.85, 124.37, 122.73, 122.14, 121.92, 121.83, 120.96, 120.67, 119.29, 119.19, 116.75.

**<sup>19</sup>F NMR** (376 MHz, DMSO) δ -57.29, -57.37.

**HRMS** (ESI) calcd. for C<sub>8</sub>H<sub>7</sub>F<sub>3</sub>NO [M+H]: 190.0480, found: 190.0478.

***N*-(4-cyanophenyl)formamide<sup>5</sup>**

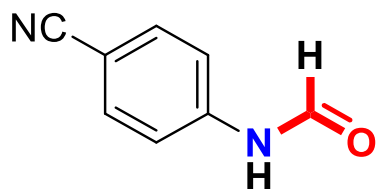

**B20:**

The title compound was prepared according to the general procedure and purified by column chromatography to give a white solid, 1.3729 gram, 94% yield.

**<sup>1</sup>H NMR** (400 MHz, DMSO-*d*<sub>6</sub>) δ 10.64 (s, 1H), 8.99 (s, 1H), 8.37 (s, 1H), 7.84 – 7.70 (m, 2H), 7.38 (d, *J* = 8.4 Hz, 1H).

**<sup>13</sup>C NMR** (101 MHz, DMSO-*d*<sub>6</sub>) δ 163.14, 160.88, 143.36, 142.75, 134.25, 133.88, 119.76, 119.40, 117.52, 105.90, 105.68.

**HRMS** (ESI) calcd. for C<sub>8</sub>H<sub>7</sub>N<sub>2</sub>O [M+H]: 147.0558, found: 147.0556.

***N*-(2-cyanophenyl)formamide<sup>5</sup>**

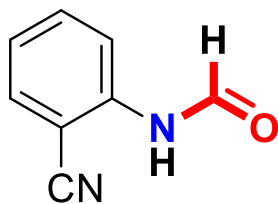

**B21:**

The title compound was prepared according to the general procedure and purified by column chromatography to give a white solid, 1.2560 gram, 86% yield.

**<sup>1</sup>H NMR** (400 MHz, CDCl<sub>3</sub>) δ 10.40 (s, 1H), 8.49 (d, *J* = 90.8 Hz, 1H), 7.94 (d, *J* = 8.4 Hz, 1H), 7.83 (dd, *J* = 7.9, 1.5 Hz, 1H), 7.72 – 7.68 (m, 1H), 7.44 (d, *J* = 15.8 Hz, 1H), 7.34 (t, *J* = 7.7 Hz, 1H).

**<sup>13</sup>C NMR** (101 MHz, CDCl<sub>3</sub>) δ 161.56, 158.87, 135.05, 134.80, 133.54, 132.39, 128.73, 128.51, 126.40, 125.68, 122.25, 118.94, 114.46, 113.01.

**HRMS** (ESI) calcd. for C<sub>8</sub>H<sub>7</sub>N<sub>2</sub>O [M+H]: 147.0558, found: 147.0559.

***N*-(4-(dimethylamino)phenyl)formamide<sup>6</sup>**

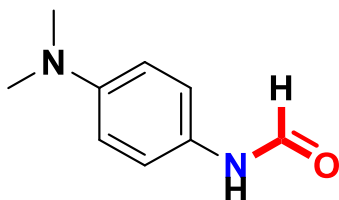

**B22:**

The title compound was prepared according to the general procedure and purified by column chromatography to give a white solid, 1.2301 gram, 75% yield.

**<sup>1</sup>H NMR** (400 MHz, DMSO-*d*<sub>6</sub>) δ 10.04 – 9.58 (m, 1H), 8.50 (d, *J* = 11.3 Hz, 1H), 8.15 (d, *J* = 2.0 Hz, 1H), 7.53 – 7.30 (m, 2H), 7.11 – 6.91 (m, 1H), 6.83 – 6.57 (m, 2H), 2.84 (s, 6H).

**<sup>13</sup>C NMR** (101 MHz, DMSO-*d*<sub>6</sub>) δ 162.96, 159.16, 148.31, 147.70, 128.55, 128.06, 120.92, 120.48, 113.80, 113.13, 40.95, 40.90.

**HRMS** (ESI) calcd. for C<sub>9</sub>H<sub>13</sub>N<sub>2</sub>O [M+H]: 165.1028, found: 165.1026.

***N*-(benzo[d][1,3]dioxol-5-yl)formamide<sup>8</sup>**

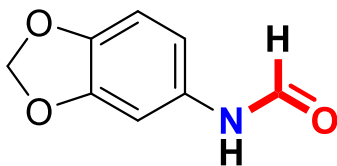

**B23:**

The title compound was prepared according to the general procedure and purified by column chromatography to give a white solid, 1.5514 gram, 94% yield.

**<sup>1</sup>H NMR** (400 MHz, DMSO-*d*<sub>6</sub>)  $\delta$  10.16 – 9.93 (m, 1H), 8.61 (d, *J* = 10.9 Hz, 1H), 8.20 (d, *J* = 1.8 Hz, 1H), 7.30 (d, *J* = 2.1 Hz, 1H), 6.97 (dd, *J* = 8.4, 2.1 Hz, 1H), 6.87 (dd, *J* = 9.9, 5.3 Hz, 1H), 6.61 (dd, *J* = 8.3, 2.2 Hz, 1H), 5.99 (d, *J* = 2.1 Hz, 1H).

**<sup>13</sup>C NMR** (101 MHz, DMSO-*d*<sub>6</sub>)  $\delta$  163.08, 159.64, 148.31, 147.54, 144.16, 143.57, 133.11, 133.08, 112.36, 111.34, 108.97, 108.58, 101.73, 101.62, 101.47, 100.60.

**HRMS** (ESI) calcd. for C<sub>8</sub>H<sub>8</sub>NO<sub>3</sub> [M+H]: 166.0505, found: 166.0509.

**methyl 4-formamidobenzoate<sup>5</sup>**

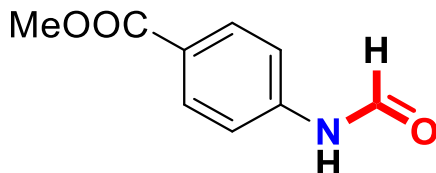

**B24:**

The title compound was prepared according to the general procedure and purified by column chromatography to give a white solid, 1.7190 gram, 96% yield.

**<sup>1</sup>H NMR** (400 MHz, DMSO-*d*<sub>6</sub>)  $\delta$  10.71 – 10.42 (m, 1H), 8.97 (d, *J* = 10.5 Hz, 1H), 8.35 (s, 1H), 8.06 – 7.86 (m, 2H), 7.72 (d, *J* = 8.7 Hz, 2H), 7.32 (d, *J* = 8.6 Hz, 1H), 3.82 (s, 3H).

**<sup>13</sup>C NMR** (101 MHz, DMSO-*d*<sub>6</sub>)  $\delta$  166.20, 163.04, 160.63, 143.44, 142.95, 131.26, 130.87, 124.81, 119.11, 116.90, 52.38.

**HRMS** (ESI) calcd. for C<sub>9</sub>H<sub>10</sub>NO<sub>3</sub> [M+H]: 180.0661, found: 180.0663.

***N*-(naphthalen-1-yl)formamide<sup>1</sup>**

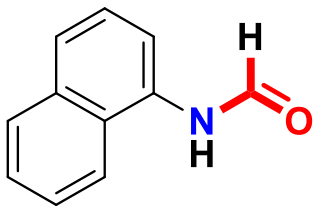

**B25:**

The title compound was prepared according to the general procedure and purified by column chromatography to give a white solid, 1.5567 gram, 91% yield.

**<sup>1</sup>H NMR** (400 MHz, DMSO-*d*<sub>6</sub>) δ 8.67 (d, *J* = 10.9 Hz, 1H), 8.37 (d, *J* = 1.1 Hz, 1H), 7.90 (s, 1H), 7.52 – 7.38 (m, 5H), 7.00 (t, *J* = 5.7 Hz, 1H).

**<sup>13</sup>C NMR** (101 MHz, DMSO-*d*<sub>6</sub>) δ 162.83, 160.56, 144.22, 142.52, 125.43, 125.10, 119.02, 116.58.

**HRMS** (ESI) calcd. for C<sub>11</sub>H<sub>10</sub>NO [M+H]: 172.0762, found: 172.0765.

***N*-(naphthalen-2-yl)formamide<sup>1</sup>**

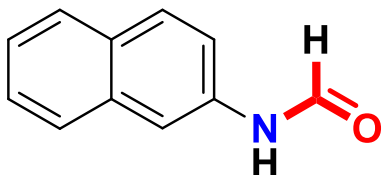

**B26:**

The title compound was prepared according to the general procedure and purified by column chromatography to give a white solid, 1.6594 gram, 97% yield.

**<sup>1</sup>H NMR** (400 MHz, CDCl<sub>3</sub>) δ 8.77 (d, *J* = 11.3 Hz, 1H), 8.46 (s, 1H), 8.38 (d, *J* = 1.8 Hz, 1H), 8.15 (d, *J* = 2.0 Hz, 1H), 7.80 – 7.66 (m, 3H), 7.52 (s, 1H), 7.47 – 7.30 (m, 3H), 7.18 (d, *J* = 1.5 Hz, 1H).

**<sup>13</sup>C NMR** (101 MHz, CDCl<sub>3</sub>) δ 161.80, 158.18, 133.23, 133.16, 132.74, 132.68, 130.06, 129.79, 128.92, 127.90, 126.77, 126.65, 126.55, 126.20, 126.10, 125.64, 124.48, 124.26, 118.57, 117.72, 116.06, 114.15.

**HRMS** (ESI) calcd. for C<sub>11</sub>H<sub>10</sub>NO [M+H]: 172.0762, found: 172.0766.

***N*-(pyridin-4-yl)formamide<sup>5</sup>**

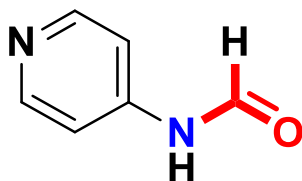

**B27:**

The title compound was prepared according to the general procedure and purified by column chromatography to give a white solid, 1.0862 gram, 89% yield.

**<sup>1</sup>H NMR** (400 MHz, DMSO-*d*<sub>6</sub>) δ 10.59 (s, 1H), 10.46 (d, *J* = 9.5 Hz, 1H), 9.06 (d, *J* = 10.5 Hz, 1H), 8.50 – 8.32 (m, 3H), 7.54 (d, *J* = 6.2 Hz, 2H), 7.20 (d, *J* = 5.8 Hz, 1H).

**<sup>13</sup>C NMR** (101 MHz, DMSO-*d*<sub>6</sub>) δ 163.00, 161.33, 151.05, 151.00, 146.03, 145.07, 113.82, 111.62.

**HRMS** (ESI) calcd. for C<sub>6</sub>H<sub>7</sub>N<sub>2</sub>O [M+H]: 123.0558, found: 123.0555.

***N*-benzylformamide<sup>1</sup>**

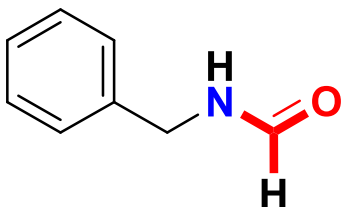

**B28:**

The title compound was prepared according to the general procedure and purified by column chromatography to give a white solid, 1.1076 gram, 82% yield.

**<sup>1</sup>H NMR** (400 MHz, CDCl<sub>3</sub>) δ 8.33 – 8.02 (m, 1H), 7.45 – 7.13 (m, 4H), 6.22 (s, 1H), 4.41 (dd, *J* = 28.1, 6.2 Hz, 2H).

**<sup>13</sup>C NMR** (101 MHz, CDCl<sub>3</sub>) δ 164.82, 161.26, 137.67, 128.74, 127.74, 126.99, 45.67, 42.10.

**HRMS** (ESI) calcd. for C<sub>8</sub>H<sub>10</sub>NO [M+H]: 136.0762, found: 136.0760.

***N*-(4-fluorobenzyl)formamide<sup>9</sup>**

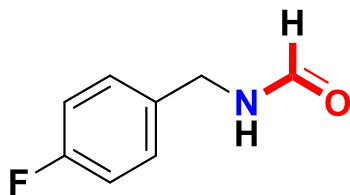

**B29:**

The title compound was prepared according to the general procedure and purified by column chromatography to give a white solid, 1.2398 gram, 82% yield.

**<sup>1</sup>H NMR** (400 MHz, DMSO-*d*<sub>6</sub>)  $\delta$  8.54 (s, 1H), 8.14 (d, *J* = 1.8 Hz, 1H), 7.31 (dd, *J* = 8.6, 5.6 Hz, 1H), 7.23 – 7.04 (m, 2H), 4.29 (d, *J* = 6.1 Hz, 1H).

**<sup>13</sup>C NMR** (101 MHz, DMSO-*d*<sub>6</sub>)  $\delta$  169.62, 165.34, 162.86, 161.52, 160.45, 136.29, 135.70, 135.67, 129.78, 129.70, 115.73, 115.60, 115.52, 115.39, 44.29, 41.84.

**<sup>19</sup>F NMR** (376 MHz, DMSO-*d*<sub>6</sub>)  $\delta$  -115.83, -116.06.

**HRMS** (ESI) calcd. for C<sub>8</sub>H<sub>9</sub>FNO [M+H]: 154.0668, found: 154.0664.

***N*-(4-chlorobenzyl)formamide<sup>9</sup>**

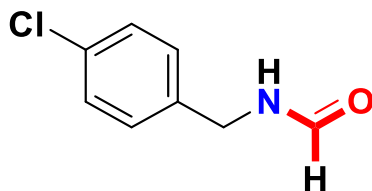

**B30:**

The title compound was prepared according to the general procedure and purified by column chromatography to give a white solid, 1.4537 gram, 86% yield.

**<sup>1</sup>H NMR** (400 MHz, DMSO-*d*<sub>6</sub>)  $\delta$  8.56 (s, 1H), 8.15 (d, *J* = 1.7 Hz, 1H), 7.45 – 7.35 (m, 1H), 7.29 (dd, *J* = 11.3, 5.2 Hz, 2H), 4.30 (d, *J* = 6.2 Hz, 1H).

**<sup>13</sup>C NMR** (101 MHz, DMSO-*d*<sub>6</sub>)  $\delta$  169.71, 165.40, 161.61, 139.16, 138.54, 131.90, 129.60, 128.72, 44.32, 41.90.

**HRMS** (ESI) calcd. for C<sub>8</sub>H<sub>9</sub>ClNO [M+H]: 170.0373, found: 170.0370.

***N*-(4-bromobenzyl)formamide<sup>10</sup>**

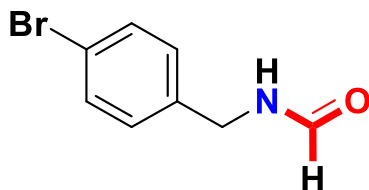

**B31:**

The title compound was prepared according to the general procedure and purified by column chromatography to give a white solid, 1.7038 gram, 80% yield.

**<sup>1</sup>H NMR** (400 MHz, DMSO-*d*<sub>6</sub>) δ 8.50 (t, *J* = 33.1 Hz, 1H), 8.26 – 8.07 (m, 1H), 7.57 – 7.48 (m, 1H), 7.22 (t, *J* = 8.2 Hz, 2H), 4.28 (d, *J* = 6.2 Hz, 1H).

**<sup>13</sup>C NMR** (101 MHz, DMSO-*d*<sub>6</sub>) δ 169.71, 165.41, 161.62, 139.58, 138.97, 131.64, 129.97, 120.36, 44.38, 41.96.

**HRMS** (ESI) calcd. for C<sub>8</sub>H<sub>9</sub>BrNO [M+H]: 213.9868, found: 213.9864.

***N*-cyclohexylformamide<sup>11</sup>**

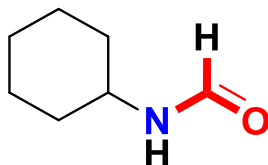

**B32:**

The title compound was prepared according to the general procedure and purified by column chromatography to give a white solid, 1.0295 gram, 82% yield.

**<sup>1</sup>H NMR** (400 MHz, CDCl<sub>3</sub>) δ 8.11 (t, *J* = 7.4 Hz, 1H), 6.06 (d, *J* = 78.7 Hz, 1H), 4.01 – 3.75 (m, 1H), 3.42 – 3.18 (m, 1H), 2.08 – 1.83 (m, 2H), 1.75 – 1.69 (m, 1H), 1.67 – 1.56 (m, 1H), 1.39 – 1.31 (m, 2H), 1.22 – 1.16 (m, 2H).

**<sup>13</sup>C NMR** (101 MHz, CDCl<sub>3</sub>) δ 163.68, 160.42, 77.42, 77.10, 76.78, 51.04, 47.06, 34.64, 32.98, 25.40, 25.00, 24.74, 24.71.

**HRMS** (ESI) calcd. for C<sub>7</sub>H<sub>14</sub>NO [M+H]: 128.1075, found: 128.1077.

### Morpholine-4-carbaldehyde<sup>11</sup>

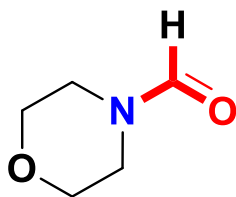

#### B33:

The title compound was prepared according to the general procedure and purified by column chromatography to give a white solid, 1.0125 gram, 82% yield.

<sup>1</sup>H NMR (400 MHz, CDCl<sub>3</sub>) δ 8.07 (s, 1H), 3.81 – 3.63 (m, 4H), 3.63 – 3.51 (m, 2H), 3.47 – 3.33 (m, 2H).

<sup>13</sup>C NMR (101 MHz, CDCl<sub>3</sub>) δ 160.84, 67.23, 66.43, 45.79, 40.59.

HRMS (ESI) calcd. for C<sub>5</sub>H<sub>10</sub>NO<sub>2</sub> [M+H]: 116.0712, found: 116.0717.

### N,N'-(1,4-phenylene)diformamide<sup>6</sup>

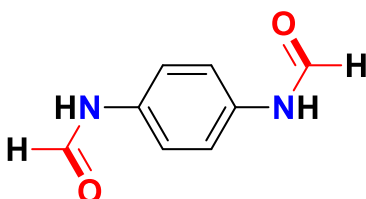

#### B34:

The title compound was prepared according to the general procedure and purified by column chromatography to give a white solid, 1.3461 gram, 82% yield.

<sup>1</sup>H NMR (400 MHz, DMSO-*d*<sub>6</sub>) δ 10.14 (s, 1H), 10.08 (d, *J* = 11.3 Hz, 1H), 8.69 (dd, *J* = 11.1, 2.0 Hz, 1H), 8.23 (d, *J* = 2.0 Hz, 1H), 7.59 – 7.46 (m, 2H), 7.15 (t, *J* = 4.4 Hz, 1H).

<sup>13</sup>C NMR (101 MHz, DMSO-*d*<sub>6</sub>) δ 162.90, 159.74, 134.82, 134.45, 120.64, 120.06, 119.32, 118.72, 40.60, 40.40, 40.19, 39.98, 39.77, 39.56, 39.35.

HRMS (ESI) calcd. for C<sub>8</sub>H<sub>9</sub>N<sub>2</sub>O<sub>2</sub> [M+H]: 165.0664, found: 165.0666.

***N,N'*-(naphthalene-1,8-diyl)diformamide**

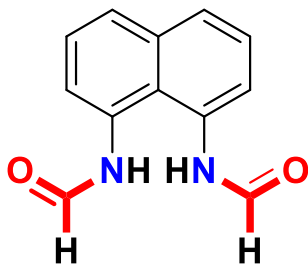

**B35:**

The title compound was prepared according to the general procedure and purified by column chromatography to give a white solid, 1.5627 gram, 73% yield.

**<sup>1</sup>H NMR** (400 MHz, CDCl<sub>3</sub>) δ 8.73 – 8.53 (m, 2H), 8.02 (d, *J* = 7.8 Hz, 1H), 7.91 – 7.85 (m, 1H), 7.79 (d, *J* = 8.3 Hz, 1H), 7.72 (d, *J* = 8.2 Hz, 1H), 7.62 – 7.44 (m, 3H), 7.32 (d, *J* = 7.3 Hz, 1H), 7.26 (s, 1H).

**<sup>13</sup>C NMR** (101 MHz, CDCl<sub>3</sub>) δ 164.11, 159.65, 134.29, 134.08, 132.13, 131.00, 128.85, 128.55, 127.77, 127.04, 126.81, 126.52, 126.23, 126.14, 125.71, 125.52, 121.32, 120.90, 120.38, 119.07.

**HRMS** (ESI) calcd. for C<sub>12</sub>H<sub>11</sub>N<sub>2</sub>O<sub>2</sub> [M+H]: 215.0821, found: 215.0823.

***N*-(4-formamidobenzyl)formamide<sup>6</sup>**

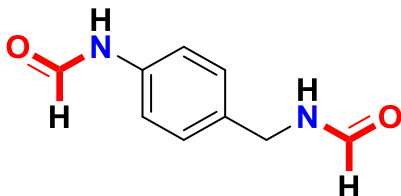

**B36:**

The title compound was prepared according to the general procedure and purified by column chromatography to give a white solid, 1.3533 gram, 76% yield.

**<sup>1</sup>H NMR** (400 MHz, DMSO-*d*<sub>6</sub>) δ 10.30 – 10.01 (m, 1H), 8.75 (d, *J* = 11.0 Hz, 1H), 8.47 (s, 1H), 8.26 (t, *J* = 2.0 Hz, 1H), 8.11 (t, *J* = 7.5 Hz, 1H), 7.62 – 7.48 (m, 2H), 7.26 – 7.10 (m, 3H), 4.22 (dd, *J* = 23.0, 6.0 Hz, 2H).

**<sup>13</sup>C NMR** (101 MHz, DMSO-*d*<sub>6</sub>) δ 165.30, 162.97, 161.44, 159.96, 137.49, 134.62, 128.90, 128.33, 119.55, 117.99, 40.78, 40.69.

**HRMS** (ESI) calcd. for C<sub>9</sub>H<sub>11</sub>N<sub>2</sub>O<sub>2</sub> [M+H]: 179.0821, found: 179.0824.

## 5. Control experiments.

### 5.1 Ultra-pure substrates experiment:

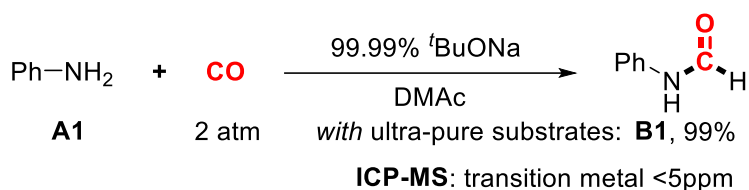

Using a nitrogen-filled glove box, an oven-dried pressure tube (10 mL) was charged with a magnetic stirring bar, 99.99% *t*BuONa (96.1 mg, 1.0 mmol), amines **A1** (91  $\mu$ L, 1.0 mmol), and DMAc (1.0 mL). Then the glass tube was placed in an autoclave which was closed tightly and removed from the glove box. Then the autoclave was purged and charged with CO (2 bar) and immersed into a pre-heated metal bath (100  $^{\circ}$ C) for 12 hours. After the reaction was finished, the autoclave was cooled to room temperature and the pressure was carefully released. Sat. aq.  $\text{NH}_4\text{Cl}$  (10 mL) was then added and the mixture was extracted with DCM ( $3 \times 10$  mL) and the combined organics were washed with brine (10 mL), dried over  $\text{Na}_2\text{SO}_4$ . A small aliquot of the organic phase was analyzed by GC, GC-MS and ICP-MS to monitor product formation. Then the solvent was evaporated under reduced pressure and the residue was purified by flash column chromatography (petroleum ether/ethyl acetate = 10:1 – 1:1, DCM 2%,  $\text{Et}_3\text{N}$  2%) on silica gel to give the corresponding products **B1**.

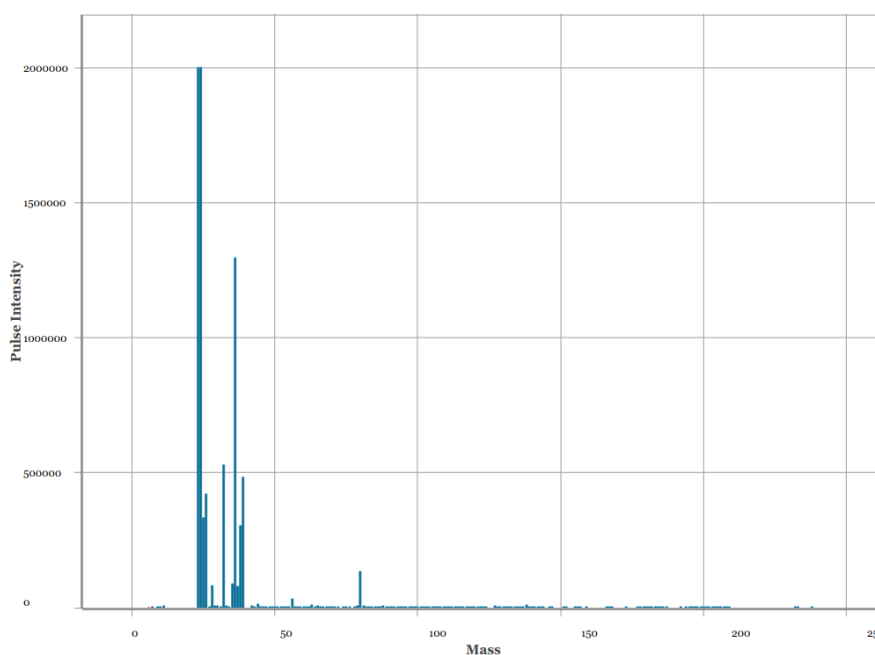

**Figure R3.** The spectrum of ICP-MS

| Na<br>(ppm)         | Ca<br>(ppm)         | Fe<br>(ppm)       | K<br>(ppm)          | Mg<br>(ppm)         | Al 27/27<br>(ppb) |
|---------------------|---------------------|-------------------|---------------------|---------------------|-------------------|
| 10.39               | 0.26                | 0                 | 0.56                | 4.47                | 0                 |
| Pd 106/106<br>(ppb) | Rh 103/103<br>(ppb) | Cr 52/52<br>(ppb) | Pb 208/208<br>(ppb) | V 51/51<br>(ppb)    | Zn 66/66<br>(ppb) |
| 0.06                | 0.00                | 0.00              | 0.00                | 0.03                | 4.04              |
| Cu 63/63<br>(ppb)   | Mn 55/55<br>(ppb)   | Ti 48/48<br>(ppb) | Ba 138/138<br>(ppb) | Cd 111/111<br>(ppb) | Co 59/59<br>(ppb) |
| 1.69                | 0.09                | 0.21              | 0.32                | 0.01                | 0.01              |
| Ni 60/60<br>(ppb)   |                     |                   |                     |                     |                   |
| 0.26                |                     |                   |                     |                     |                   |

**Table R1** The data of ICP-MS

## 5.2 Control experiment with 15-crown-5:

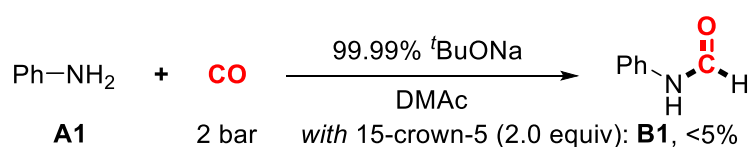

Using a nitrogen-filled glove box, an oven-dried pressure tube (10 mL) was charged with a magnetic stirring bar, <sup>t</sup>BuONa (96.1 mg, 1.0 mmol), amines **A1** (91 μL, 1.0 mmol), 15-crown-5 (2 mmol), and DMAc (1.0 mL). Then the glass tube was placed in an autoclave which was closed tightly and removed from the glove box. Then the autoclave was purged and charged with CO (2 bar) and immersed into a pre-heated metal bath (100 °C) for 12 hours. After the reaction was finished, the autoclave was cooled to room temperature and the pressure was carefully released. Sat. aq. NH<sub>4</sub>Cl (10 mL) was then added and the mixture was extracted with DCM (3 × 10 mL) and the combined organics were washed with brine (10 mL), dried over Na<sub>2</sub>SO<sub>4</sub>. A small aliquot of the organic phase was analyzed by GC and GC-MS to monitor product formation. Then the solvent was evaporated under reduced pressure and the residue was purified by flash column chromatography (petroleum ether/ethyl acetate = 10:1 – 1:1, DCM 2%, Et<sub>3</sub>N 2%) on silica gel to give the corresponding products **B1**.

### 5.3 Control experiment with 18-crown-6:

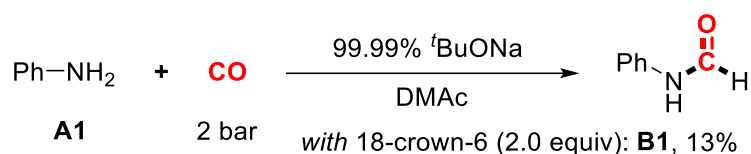

Using a nitrogen-filled glove box, an oven-dried pressure tube (10 mL) was charged with a magnetic stirring bar, <sup>t</sup>BuONa (96.1 mg, 1.0 mmol), amines **A1** (91 μL, 1.0 mmol), 18-crown-6 (2 mmol), and DMAc (1.0 mL). Then the glass tube was placed in an autoclave which was closed tightly and removed from the glove box. Then the autoclave was purged and charged with CO (2 bar) and immersed into a pre-heated metal bath (100 °C) for 12 hours. After the reaction was finished, the autoclave was cooled to room temperature and the pressure was carefully released. Sat. aq. NH<sub>4</sub>Cl (10 mL) was then added and the mixture was extracted with DCM (3 × 10 mL) and the combined organics were washed with brine (10 mL), dried over Na<sub>2</sub>SO<sub>4</sub>. A small aliquot of the organic phase was analyzed by GC and GC-MS to monitor product formation. Then the solvent was evaporated under reduced pressure and the residue was purified by flash column chromatography (petroleum ether/ethyl acetate = 10:1 – 1:1, DCM 2%, Et<sub>3</sub>N 2%) on silica gel to give the corresponding products **B1**.

### 5.4 Radical capture experiment with TMEPO:

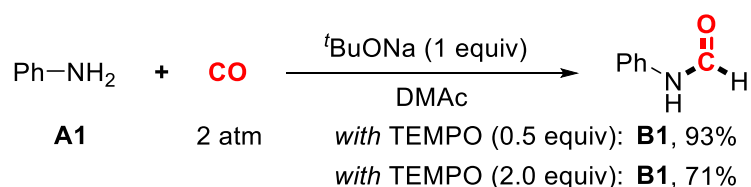

Using a nitrogen-filled glove box, an oven-dried pressure tube (10 mL) was charged with a magnetic stirring bar, <sup>t</sup>BuONa (96.1 mg, 1.0 mmol), amines **A1** (91 μL, 1.0 mmol), TMEPO (0.5 mmol or 2 mmol), and DMAc (1.0 mL). Then the glass tube was placed in an autoclave which was closed tightly and removed from the glove box. Then the autoclave was purged and charged with CO (2 bar) and immersed into a pre-heated metal bath (100 °C) for 12 hours. After the reaction was finished, the autoclave was cooled to room temperature and the pressure was carefully released. Sat. aq. NH<sub>4</sub>Cl (10 mL) was then added and the mixture was extracted with DCM (3 × 10 mL) and the combined organics were washed with brine (10 mL), dried over Na<sub>2</sub>SO<sub>4</sub>. A small aliquot of the organic phase was analyzed by GC and GC-MS to monitor product

formation. Then the solvent was evaporated under reduced pressure and the residue was purified by flash column chromatography (petroleum ether/ethyl acetate = 10:1 – 1:1, DCM 2%, Et<sub>3</sub>N 2%) on silica gel to give the corresponding products **B1**.

### 5.5 Radical capture experiment with Ph<sub>2</sub>C=CH<sub>2</sub>:

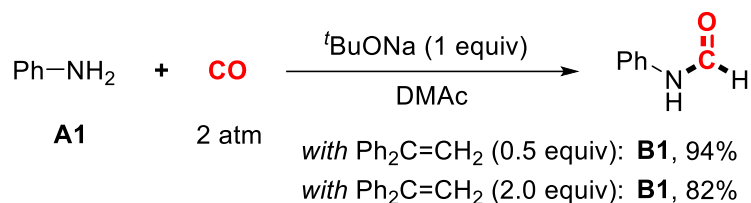

Using a nitrogen-filled glove box, an oven-dried pressure tube (10 mL) was charged with a magnetic stirring bar, <sup>t</sup>BuONa (96.1 mg, 1.0 mmol), amines **A1** (91 μL, 1.0 mmol), Ph<sub>2</sub>C=CH<sub>2</sub> (0.5 mmol or 2 mmol), and DMAc (1.0 mL). Then the glass tube was placed in an autoclave which was closed tightly and removed from the glove box. Then the autoclave was purged and charged with CO (2 bar) and immersed into a pre-heated metal bath (100 °C) for 12 hours. After the reaction was finished, the autoclave was cooled to room temperature and the pressure was carefully released. Sat. aq. NH<sub>4</sub>Cl (10 mL) was then added and the mixture was extracted with DCM (3 × 10 mL) and the combined organics were washed with brine (10 mL), dried over Na<sub>2</sub>SO<sub>4</sub>. A small aliquot of the organic phase was analyzed by GC and GC-MS to monitor product formation. Then the solvent was evaporated under reduced pressure and the residue was purified by flash column chromatography (petroleum ether/ethyl acetate = 10:1 – 1:1, DCM 2%, Et<sub>3</sub>N 2%) on silica gel to give the corresponding products **B1**.

## 6 Mechanism investigations

### 6.1 Mechanism investigations for 60 minutes:

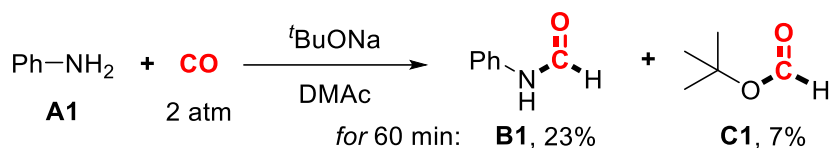

Using a nitrogen-filled glove box, an oven-dried pressure tube (10 mL) was charged with a magnetic stirring bar,  $t\text{BuONa}$  (96.1 mg, 1.0 mmol), amines **A1** (91  $\mu\text{L}$ , 1.0 mmol), and DMAc (1.0 mL). Then the glass tube was placed in an autoclave which was closed tightly and removed from the glove box. Then the autoclave was purged and charged with CO (2 bar) and immersed into a pre-heated metal bath (100  $^{\circ}\text{C}$ ) for 30 minutes. After the reaction was finished, the autoclave was cooled to room temperature and the pressure was carefully released. Sat. aq.  $\text{NH}_4\text{Cl}$  (10 mL) was then added and the mixture was extracted with ethyl acetate ( $3 \times 10$  mL) and the combined organics were washed with brine (10 mL), dried over  $\text{Na}_2\text{SO}_4$ . A small aliquot of the organic phase was analyzed by GC and GC-MS to monitor products formation.

### 6.2 Synthesis of C1:

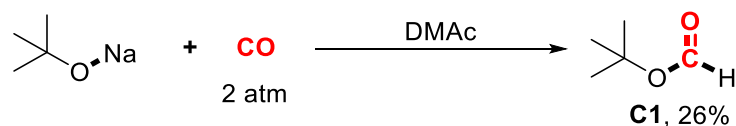

Using a nitrogen-filled glove box, an oven-dried pressure tube (50 mL) was charged with a magnetic stirring bar,  $t\text{BuONa}$  (96.1 mg, 10 mmol), and DMAc (10 mL). Then the glass tube was placed in an autoclave which was closed tightly and removed from the glove box. Then the autoclave was purged and charged with CO (2 bar) and immersed into a pre-heated metal bath (100  $^{\circ}\text{C}$ ) for 12 hours. After the reaction was finished, the autoclave was cooled to room temperature and the pressure was carefully released. Sat. aq.  $\text{NH}_4\text{Cl}$  (10 mL) was then added and the mixture was extracted with  $\text{Et}_2\text{O}$  ( $3 \times 10$  mL) and the combined organics were washed with brine (10 mL), dried over  $\text{Na}_2\text{SO}_4$ . A small aliquot of the organic phase was analyzed by GC and GC-MS to monitor product **C1** formation. The solvent was evaporated under reduced pressure for giving the **C1** (163 mg, 16% yield) as colorless oil.

$^1\text{H}$  NMR (400 MHz,  $\text{CDCl}_3$ ): 7.99 (s, 1H), 1.48 (s, 9H).  $^{13}\text{C}$  NMR (100 MHz,  $\text{CDCl}_3$ ): 160.7, 81.4, 28.3. HRMS (ESI) calcd. for  $\text{C}_5\text{H}_{11}\text{O}_2$  [ $\text{M}+\text{H}$ ]: 103.0759, found: 103.0758.

### 6.3 Mechanism investigations with C1 in absence of base:

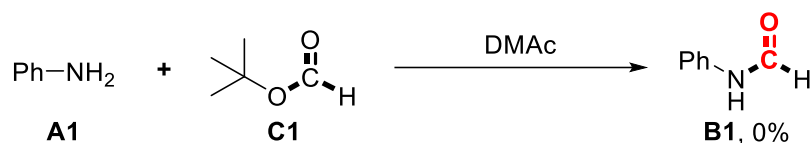

Using a nitrogen-filled glove box, an oven-dried pressure tube (10 mL) was charged with a magnetic stirring bar, **C1** (2.0 mmol), amines **A1** (91  $\mu$ L, 1.0 mmol), and DMAc (1.0 mL). Then the glass tube was placed in an autoclave which was closed tightly and removed from the glove box. Then the tube immersed into a pre-heated metal bath (100  $^{\circ}$ C) for 12 hours. After the reaction was finished, the mixture was cooled to room temperature and the pressure was carefully released. Sat. aq. NH<sub>4</sub>Cl (10 mL) was then added and the mixture was extracted with ethyl acetate (3  $\times$  10 mL) and the combined organics were washed with brine (10 mL), dried over Na<sub>2</sub>SO<sub>4</sub>. A small aliquot of the organic phase was analyzed by GC and GC-MS to monitor product **B1** formation.

### 6.4 Mechanism investigations with C1 in presence of base:

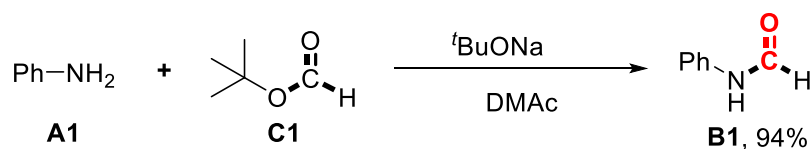

Using a nitrogen-filled glove box, an oven-dried pressure tube (10 mL) was charged with a magnetic stirring bar, <sup>t</sup>BuONa (96.1 mg, 1.0 mmol), **C1** (2.0 mmol), amines **A1** (91  $\mu$ L, 1.0 mmol), and DMAc (1.0 mL). Then the glass tube was placed in an autoclave which was closed tightly and removed from the glove box. Then the tube immersed into a pre-heated metal bath (100  $^{\circ}$ C) for 12 hours. After the reaction was finished, the mixture was cooled to room temperature and the pressure was carefully released. Sat. aq. NH<sub>4</sub>Cl (10 mL) was then added and the mixture was extracted with ethyl acetate (3  $\times$  10 mL) and the combined organics were washed with brine (10 mL), dried over Na<sub>2</sub>SO<sub>4</sub>. A small aliquot of the organic phase was analyzed by GC and GC-MS to monitor product **B1** formation.

## 6.5 Mechanism investigations with A1-Na and C1

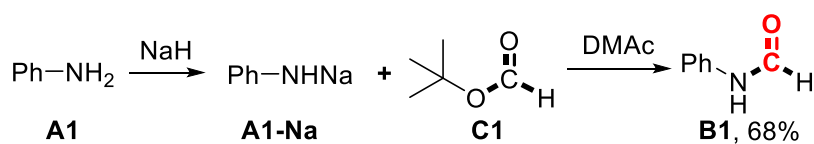

Using a nitrogen-filled glove box, an oven-dried pressure tube (10 mL) was charged with a magnetic stirring bar, NaH (26.4 mg, 1.1 mmol), amines **A1** (91  $\mu\text{L}$ , 1.0 mmol). Then the glass tube was closed tightly and removed from the glove box. Then the mixture immersed into a pre-heated metal bath (100  $^{\circ}\text{C}$ ) for an hour. After the reaction was finished, the tube was cooled to room temperature and put into the glove box again. The **C1** (2.0 mmol) and DMAc (1.0 mL) were added. Then the tube closed tightly and removed from the glove box. The mixture was immersed into a pre-heated metal bath (100  $^{\circ}\text{C}$ ) for 12 hours. After the reaction was finished, the mixture was cooled to room temperature and the pressure was carefully released. Sat. aq.  $\text{NH}_4\text{Cl}$  (10 mL) was then added and the mixture was extracted with ethyl acetate ( $3 \times 10$  mL) and the combined organics were washed with brine (10 mL), dried over  $\text{Na}_2\text{SO}_4$ . A small aliquot of the organic phase was analyzed by GC and GC-MS to monitor product **B1** formation.

## 6.6 Mechanism investigations for the competition experiment:

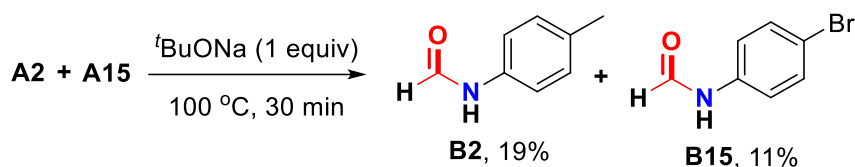

Using a nitrogen-filled glove box, an oven-dried pressure tube (10 mL) was charged with a magnetic stirring bar,  $t\text{BuONa}$  (0.96 g, 10.0 mmol), amines **A2** (5.0 mmol) and **A15** (5.0 mmol), and DMAc (10.0 mL). Then the glass tube was placed in an autoclave which was closed tightly and removed from the glove box. Then the autoclave was purged and charged with  $\text{CO}$  (2 bar) and immersed into a pre-heated metal bath (100  $^{\circ}\text{C}$ ) for 30 minutes. After the reaction was finished, the autoclave was cooled to room temperature and the pressure was carefully released. Sat. aq.  $\text{NH}_4\text{Cl}$  (10 mL) was then added and the mixture was extracted with ethyl acetate ( $3 \times 10$  mL) and the combined organics were washed with brine (10 mL), dried over  $\text{Na}_2\text{SO}_4$ . A small aliquot of the organic phase was analyzed by GC or GC-MS to monitor products formation. Then the solvent was evaporated under reduced pressure and the residue was

purified by flash column chromatography (petroleum ether/ethyl acetate = 10:1 – 1:1, DCM 2%, Et<sub>3</sub>N 2%) on silica gel to give the corresponding products **B2**, 128.0 mg, 19% yield. **B15**, 110.1 mg, 11% yield.

### 6.7 Mechanism investigations for the competition experiment:

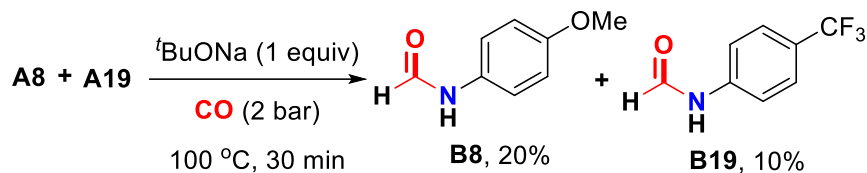

Using a nitrogen-filled glove box, an oven-dried pressure tube (10 mL) was charged with a magnetic stirring bar,  $t\text{BuONa}$  (0.96 g, 10.0 mmol), amines **A8** (5.0 mmol) and **A19** (5.0 mmol), and DMAc (10.0 mL). Then the glass tube was placed in an autoclave which was closed tightly and removed from the glove box. Then the autoclave was purged and charged with  $\text{CO}$  (2 bar) and immersed into a pre-heated metal bath ( $100\text{ }^{\circ}\text{C}$ ) for 30 minutes. After the reaction was finished, the autoclave was cooled to room temperature and the pressure was carefully released. Sat. aq.  $\text{NH}_4\text{Cl}$  (10 mL) was then added and the mixture was extracted with ethyl acetate ( $3 \times 10\text{ mL}$ ) and the combined organics were washed with brine (10 mL), dried over  $\text{Na}_2\text{SO}_4$ . A small aliquot of the organic phase was analyzed by GC or GC-MS to monitor products formation. Then the solvent was evaporated under reduced pressure and the residue was purified by flash column chromatography (petroleum ether/ethyl acetate = 10:1 – 1:1, DCM 2%, Et<sub>3</sub>N 2%) on silica gel to give the corresponding products **B8**, 151.1 mg, 20% yield. **B19**, 94.6 mg, 10% yield.

## 7 Deuterium-labeled investigations

### 7.1 Deuterium-labeled investigations with A1-D:

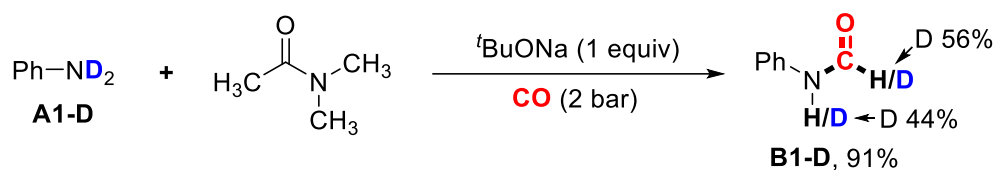

Using a nitrogen-filled glove box, an oven-dried pressure tube (10 mL) was charged with a magnetic stirring bar, 99.99% <sup>t</sup>BuONa (96.1 mg, 1.0 mmol), amines **A1-D** (93 μL, 1.0 mmol), and DMAc (1.0 mL). Then the glass tube was placed in an autoclave which was closed tightly and removed from the glove box. Then the autoclave was purged and charged with CO (2 bar) and immersed into a pre-heated metal bath (100 °C) for 12 hours. After the reaction was finished, the autoclave was cooled to room temperature and the pressure was carefully released. Sat. aq. NH<sub>4</sub>Cl (10 mL) was then added and the mixture was extracted with DCM (3 × 10 mL) and the combined organics were washed with brine (10 mL), dried over Na<sub>2</sub>SO<sub>4</sub>. A small aliquot of the organic phase was analyzed by GC, GC-MS and ICP-MS to monitor product formation. Then the solvent was evaporated under reduced pressure and the residue was purified by flash column chromatography (petroleum ether/ethyl acetate = 10:1 – 1:1, DCM 2%, Et<sub>3</sub>N 2%) on silica gel to give the corresponding products **B1-D**. HRMS (ESI) calcd. for C<sub>7</sub>H<sub>6</sub>D<sub>2</sub>NO [M+H]: 124.0731, found: 124.0733.

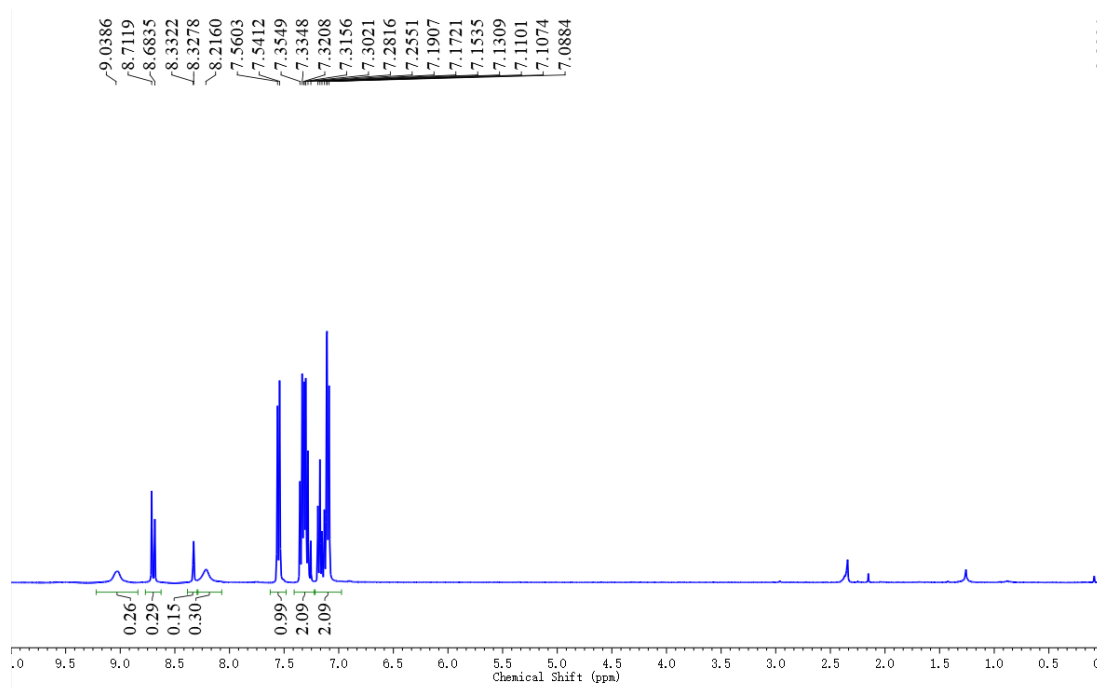

Figure S1

## 7.2 Deuterium-labeled investigations with DMAc-*d*<sub>9</sub>:

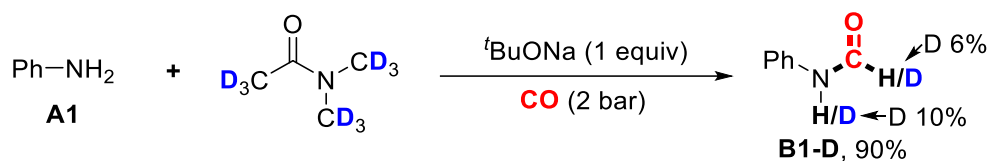

Using a nitrogen-filled glove box, an oven-dried pressure tube (10 mL) was charged with a magnetic stirring bar, 99.99% *t*BuONa (96.1 mg, 1.0 mmol), amines **A1** (91  $\mu$ L, 1.0 mmol), and DMAc-*d*<sub>9</sub> (1.0 mL). Then the glass tube was placed in an autoclave which was closed tightly and removed from the glove box. Then the autoclave was purged and charged with CO (2 bar) and immersed into a pre-heated metal bath (100 °C) for 12 hours. After the reaction was finished, the autoclave was cooled to room temperature and the pressure was carefully released. Sat. aq. NH<sub>4</sub>Cl (10 mL) was then added and the mixture was extracted with DCM (3  $\times$  10 mL) and the combined organics were washed with brine (10 mL), dried over Na<sub>2</sub>SO<sub>4</sub>. A small aliquot of the organic phase was analyzed by GC, GC-MS and ICP-MS to monitor product formation. Then the solvent was evaporated under reduced pressure and the residue was purified by flash column chromatography (petroleum ether/ethyl acetate = 10:1 – 1:1, DCM 2%, Et<sub>3</sub>N 2%) on silica gel to give the corresponding products **B1-D**. HRMS (ESI) calcd. for C<sub>7</sub>H<sub>8</sub>NO [M+H]<sup>+</sup>: 122.0606, found: 122.0604.

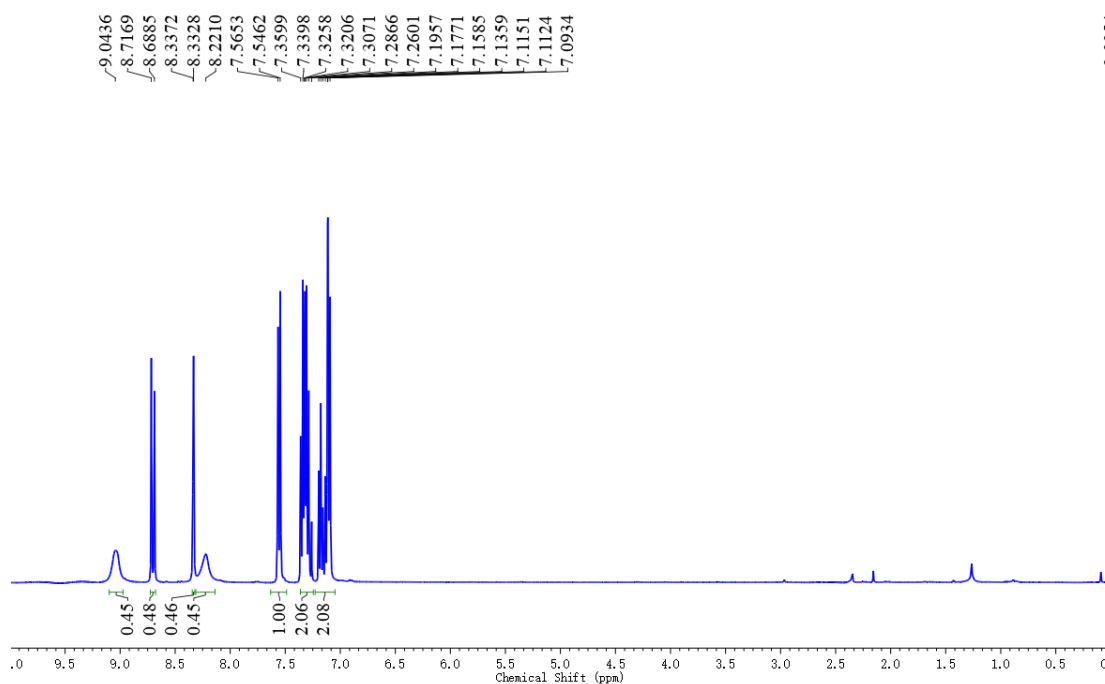

**Figure S2**

### 7.3 Deuterium-labeled investigations with A1-D and DMac-d<sub>9</sub>:

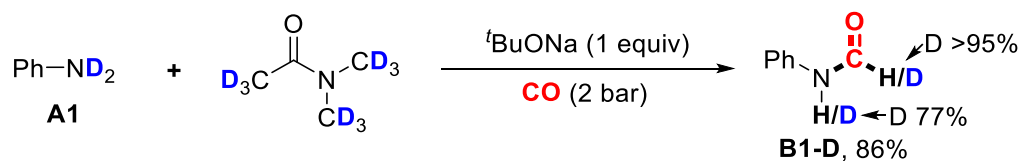

Using a nitrogen-filled glove box, an oven-dried pressure tube (10 mL) was charged with a magnetic stirring bar, 99.99% *t*BuONa (96.1 mg, 1.0 mmol), amines **A1-D** (93  $\mu\text{L}$ , 1.0 mmol), and DMac-*d*<sub>9</sub> (1.0 mL). Then the glass tube was placed in an autoclave which was closed tightly and removed from the glove box. Then the autoclave was purged and charged with CO (2 bar) and immersed into a pre-heated metal bath (100 °C) for 12 hours. After the reaction was finished, the autoclave was cooled to room temperature and the pressure was carefully released. Sat. aq. NH<sub>4</sub>Cl (10 mL) was then added and the mixture was extracted with DCM (3  $\times$  10 mL) and the combined organics were washed with brine (10 mL), dried over Na<sub>2</sub>SO<sub>4</sub>. A small aliquot of the organic phase was analyzed by GC, GC-MS and ICP-MS to monitor product formation. Then the solvent was evaporated under reduced pressure and the residue was purified by flash column chromatography (petroleum ether/ethyl acetate = 10:1 – 1:1, DCM 2%, Et<sub>3</sub>N 2%) on silica gel to give the corresponding products **B1-D**. HRMS (ESI) calcd. for C<sub>7</sub>H<sub>6</sub>D<sub>2</sub>NO [M+H]<sup>+</sup>: 124.0731, found: 124.0733.

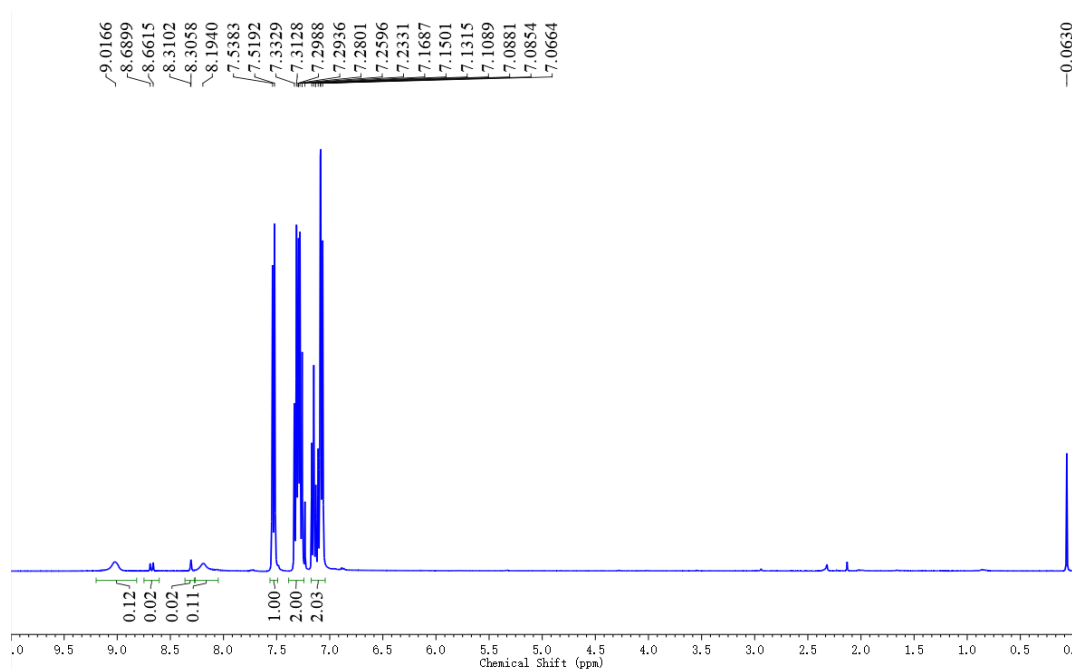

Figure S3

## 7.4 Deuterium-labeled investigations with D<sub>2</sub>O:

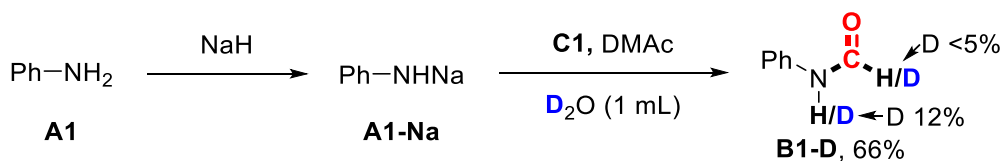

Using a nitrogen-filled glove box, an oven-dried pressure tube (10 mL) was charged with a magnetic stirring bar, NaH (26.4 mg, 1.1 mmol), amines **A1** (91  $\mu$ L, 1.0 mmol). Then the glass tube was closed tightly and removed from the glove box. Then the mixture immersed into a pre-heated metal bath (100  $^{\circ}$ C) for an hour. After the reaction was finished, the tube was cooled to room temperature and put into the glove box again. The **C1** (2.0 mmol) and DMAc (1.0 mL) were added. Then the tube closed tightly and removed from the glove box. The mixture was immersed into a pre-heated metal bath (100  $^{\circ}$ C) for 12 hours. After the reaction was finished, the mixture was cooled to room temperature and D<sub>2</sub>O (1.0 mL) was then added. Then mixture was extracted with ethyl acetate (3  $\times$  5 mL) and the combined organics were washed with brine (5 mL), dried over Na<sub>2</sub>SO<sub>4</sub>. A small aliquot of the organic phase was analyzed by GC and GC-MS to monitor product **B1-D** formation. HRMS (ESI) calcd. for C<sub>7</sub>H<sub>7</sub>DNO [M+H]<sup>+</sup>: 123.0669, found: 123.0668.

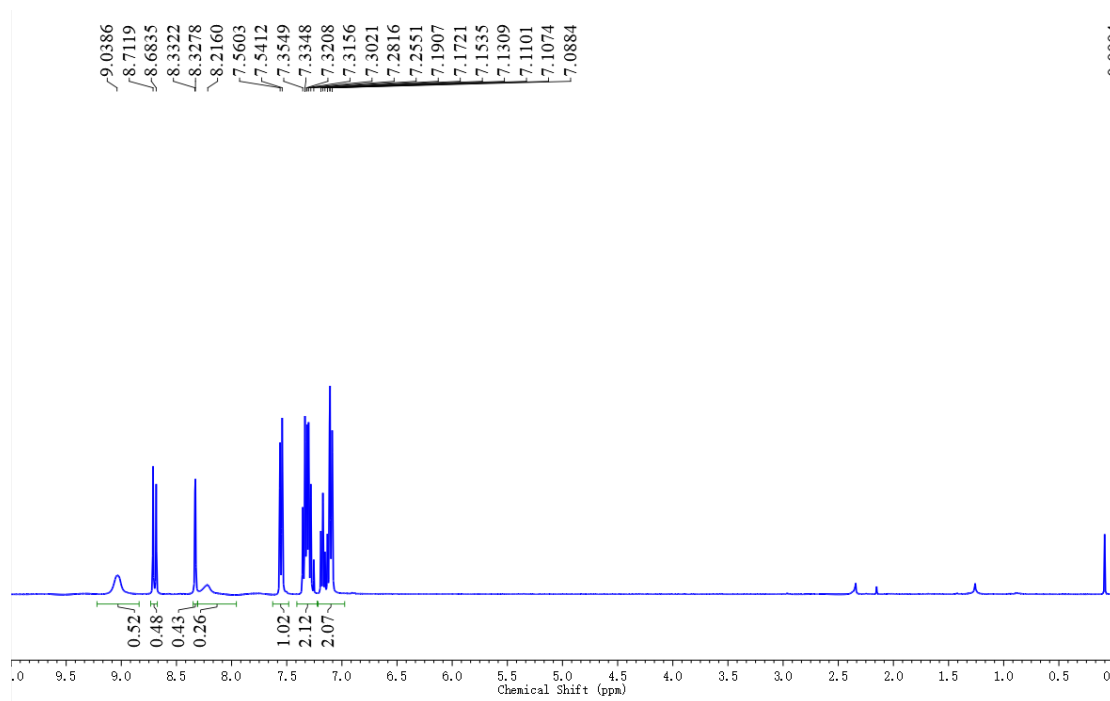

Figure S4

## 7.5 Deuterium-labeled investigations with D<sub>2</sub>O:

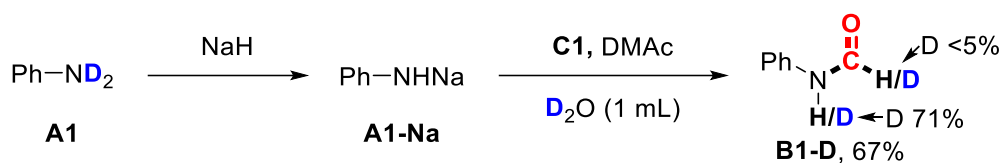

Using a nitrogen-filled glove box, an oven-dried pressure tube (10 mL) was charged with a magnetic stirring bar, NaH (26.4 mg, 1.1 mmol), amines **A1-D** (93  $\mu\text{L}$ , 1.0 mmol). Then the glass tube was closed tightly and removed from the glove box. Then the mixture immersed into a pre-heated metal bath (100  $^{\circ}\text{C}$ ) for an hour. After the reaction was finished, the tube was cooled to room temperature and put into the glove box again. The **C1** (2.0 mmol) and DMAc (1.0 mL) were added. Then the tube closed tightly and removed from the glove box. The mixture was immersed into a pre-heated metal bath (100  $^{\circ}\text{C}$ ) for 12 hours. After the reaction was finished, the mixture was cooled to room temperature and D<sub>2</sub>O (1.0 mL) was then added. Then mixture was extracted with ethyl acetate (3  $\times$  5 mL) and the combined organics were washed with brine (5 mL), dried over Na<sub>2</sub>SO<sub>4</sub>. A small aliquot of the organic phase was analyzed by GC and GC-MS to monitor product **B1-D** formation. HRMS (ESI) calcd. for C<sub>7</sub>H<sub>7</sub>DNO [M+H]<sup>+</sup>: 123.0669, found: 123.0670.

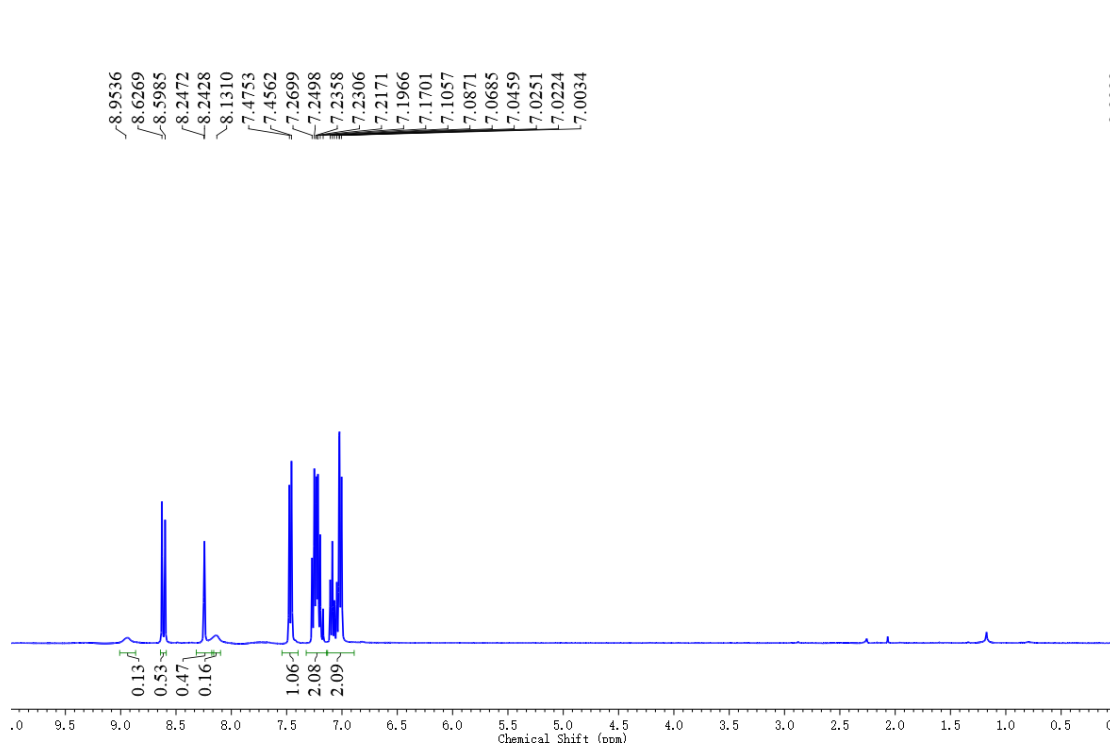

Figure S5

## 7.6 Labeled investigations with $\text{CH}_3^{13}\text{C}(\text{O})\text{N}(\text{CH}_3)_2$ :

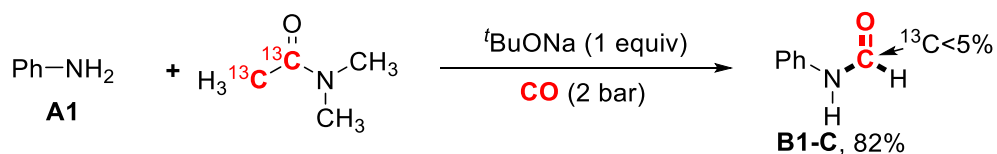

Using a nitrogen-filled glove box, an oven-dried pressure tube (10 mL) was charged with a magnetic stirring bar, 99.99% <sup>t</sup>BuONa (96.1 mg, 1.0 mmol), amines **A1** (91  $\mu$ L, 1.0 mmol), and  $\text{CH}_3^{13}\text{C}(\text{O})\text{N}(\text{CH}_3)_2$  (0.5 mL). Then the glass tube was placed in an autoclave which was closed tightly and removed from the glove box. Then the autoclave was purged and charged with CO (2 bar) and immersed into a pre-heated metal bath (100 °C) for 12 hours. After the reaction was finished, the autoclave was cooled to room temperature and the pressure was carefully released. Sat. aq.  $\text{NH}_4\text{Cl}$  (10 mL) was then added and the mixture was extracted with DCM ( $3 \times 10$  mL) and the combined organics were washed with brine (10 mL), dried over  $\text{Na}_2\text{SO}_4$ . A small aliquot of the organic phase was analyzed by GC, GC-MS and ICP-MS to monitor product formation. Then the solvent was evaporated under reduced pressure and the residue was purified by flash column chromatography (petroleum ether/ethyl acetate = 10:1 – 1:1, DCM 2%,  $\text{Et}_3\text{N}$  2%) on silica gel to give the corresponding products **B1-C**.

**<sup>1</sup>H NMR** (400 MHz,  $\text{CDCl}_3$ )  $\delta$  9.04 (br, 0.5H), 8.70 (d,  $J$  = 11.2 Hz, 0.5H), 8.33 (s, 0.5H), 8.22 (br, 0.5H), 7.56 (d,  $J$  = 7.6 Hz, 1H), 7.36 – 7.29 (m, 2H), 7.23 – 6.98 (m, 2H). **<sup>13</sup>C NMR** (101 MHz,  $\text{CDCl}_3$ )  $\delta$  162.10, 158.60, 135.99, 135.79, 128.67, 128.00, 124.20, 123.71, 119.12, 119.10, 117.72. **HRMS** (ESI) calcd. for  $\text{C}_7\text{H}_8\text{NO}$  [ $\text{M}+\text{H}$ ]: 122.0606, found: 122.0604.

## 8. Application and further transformation

### 8.1 Gram experiment for Paracetamol

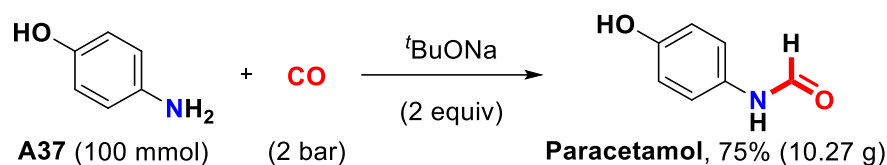

Using a nitrogen, an oven-dried tube (1.0 L) was charged with a mechanical agitator bar, *t*BuONa (19.2 g, 200 mmol), amine **A37** (10.9 g, 100 mmol), and DMAc (200 mL). Then the tube was placed in an autoclave which was closed tightly. Then the autoclave was purged and charged with CO (2 bar) and immersed into a pre-heated metal bath (100 °C) for 48 hours. After the reaction was finished, the autoclave was cooled to room temperature and the pressure was carefully released under well ventilated fume hood. Sat. aq. NH<sub>4</sub>Cl (200 mL) was then added and the mixture was extracted with DCM (3 × 200 mL) and the combined organics were washed with brine (200 mL), dried over Na<sub>2</sub>SO<sub>4</sub>. A small aliquot of the organic phase was analyzed by GC and GC-MS to monitor product formation. Then the solvent was evaporated under reduced pressure and the residue was purified by recrystallization (DCM) to give the corresponding product **Paracetamol**.

#### **Paracetamol:**<sup>6</sup>

<sup>1</sup>H NMR (400 MHz, DMSO-*d*<sub>6</sub>) δ 9.99 – 9.84 (m, 1H), 9.30 (s, 1H), 8.56 (d, *J* = 11.2 Hz, 1H), 8.21 (t, *J* = 3.0 Hz, 1H), 7.52 – 7.31 (m, 1H), 7.13 – 6.91 (m, 1H), 6.84 – 6.66 (m, 2H).

<sup>13</sup>C NMR (101 MHz, DMSO-*d*<sub>6</sub>) δ 163.01, 159.27, 154.64, 153.97, 130.43, 130.10, 121.23, 120.63, 116.24, 115.62.

HRMS (ESI) calcd. for C<sub>7</sub>H<sub>8</sub>NO<sub>2</sub> [M+H]: 138.0555, found: 138.0558.

## 8.2 Gram experiment for B2

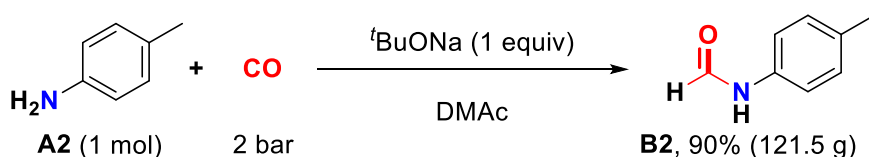

Using a nitrogen, an oven-dried tube (2.5 L) was charged with a mechanical agitator bar,  $t\text{BuONa}$  (96.1 g, 1.0 mol), amine **A2** (107.1 g, 1.0 mol), and DMAc (1.0 L). Then the tube was placed in an autoclave which was closed tightly. Then the autoclave was purged and charged with CO (2 bar) and immersed into a pre-heated metal bath (100 °C) for 48 hours. After the reaction was finished, the autoclave was cooled to room temperature and the pressure was carefully released under well ventilated fume hood. Sat. aq.  $\text{NH}_4\text{Cl}$  (1 L) was then added and the mixture was extracted with DCM ( $3 \times 1$  L) and the combined organics were washed with brine (1 L), dried over  $\text{Na}_2\text{SO}_4$ . A small aliquot of the organic phase was analyzed by GC and GC-MS to monitor product formation. Then the solvent was evaporated under reduced pressure and the residue was purified by recrystallization (DCM) to give the corresponding product **B2**.

## 8.3 Synthesis of D1

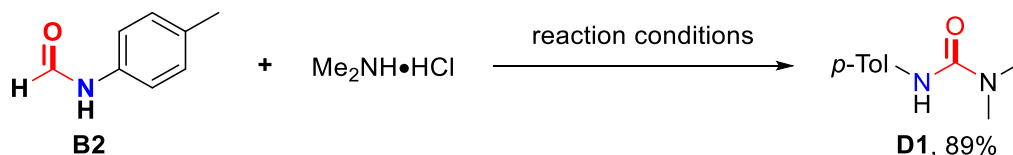

To a stirring 0 °C mixture of  $\text{Me}_2\text{NH} \cdot \text{HCl}$  (3 mmol) and **B2** (1 mmol) in DCM (5 mL), as added  $\text{Et}_3\text{N}$  (3 mmol) dropwise under argon. After 5 min at 0°C and 12 hours at room temperature, 5 mL water was added and mixed vigorously until the organic layer became clear. The mixture was extracted with DCM ( $3 \times 5$  mL) and the combined organics were washed with brine (5 mL), dried over  $\text{Na}_2\text{SO}_4$ . A small aliquot of the organic phase was analyzed by GC and GC-MS to monitor product formation. Then the solvent was evaporated under reduced pressure and the residue was purified by flash column chromatography (petroleum ether/ethyl acetate = 10:1 – 1:1, DCM 10%) on silica gel to give the corresponding products **D1**.

### 1,1-dimethyl-3-(p-tolyl)urea (**D1**): <sup>12</sup>

<sup>1</sup>H NMR (400 MHz,  $\text{CDCl}_3$ )  $\delta$  7.22-7.25 (m, 2H), 7.04-7.07 (m, 2H), 6.30 (br, 1H), 2.99 (s, 6H), 2.27 (s, 3H);

$^{13}\text{C}$  NMR (101 MHz,  $\text{CDCl}_3$ )  $\delta$  156.0, 136.6, 132.6, 129.4, 120.2, 36.5, 20.8;

HRMS (ESI) calcd. for  $\text{C}_{10}\text{H}_{15}\text{N}_2\text{O}$   $[\text{M}+\text{H}]$ : 179.1180, found: 179.1182

#### 8.4 Synthesis of D2

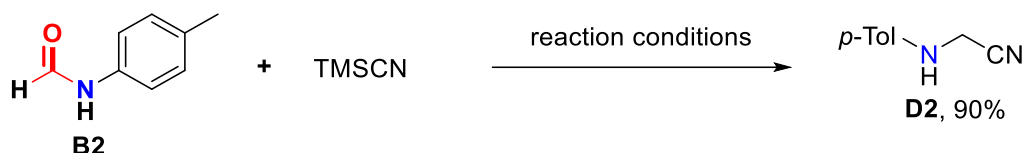

Using a nitrogen-filled glove box, an oven-dried pressure tube (38 mL volume) was charged with a magnetic stirring bar, **B2** (1 mmol),  $\text{FeI}_2$  (0.1 mmol), MeCN (3.0 mL), TMDs (2 mmol) and TMSCN (2 mmol). Then the seal tube was closed tightly with a rubber stopper, removed from the glove box and stirred at room temperature for 12 h. After the reaction was finished, sat. aq.  $\text{NH}_4\text{Cl}$  (5 mL) was then added. The mixture was extracted with DCM ( $3 \times 5$  mL) and the combined organics were washed with brine (5 mL), dried over  $\text{Na}_2\text{SO}_4$ . A small aliquot of the organic phase was analyzed by GC and GC-MS to monitor product formation. Then the solvent was evaporated under reduced pressure and the residue was purified by flash column chromatography (petroleum ether/ethyl acetate = 10:1 – 5:1, DCM 2%) on silica gel to give the corresponding products **D2**.

##### 2-(p-tolylamino)acetonitrile (**D2**):<sup>13</sup>

$^1\text{H}$  NMR (400 MHz,  $\text{CDCl}_3$ )  $\delta$  7.05 (d,  $J$  = 8.4 Hz, 2H), 6.64 – 6.58 (m, 2H), 4.01 (d,  $J$  = 7.1 Hz, 2H), 3.82 (s, 1H), 2.26 (s, 3H);

$^{13}\text{C}$  NMR (101 MHz,  $\text{CDCl}_3$ )  $\delta$  142.6, 130.0, 129.3, 117.0, 113.7, 33.0, 20.4;

HRMS (ESI) calcd. for  $\text{C}_9\text{H}_{11}\text{N}_2$   $[\text{M}+\text{H}]$ : 147.0922, found: 147.0924.

#### 8.4 Synthesis of D3

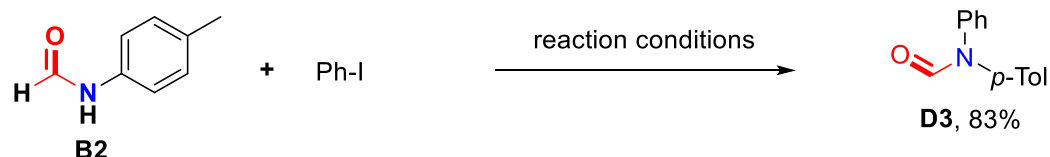

Using a nitrogen-filled glove box, an oven-dried pressure tube (38 mL volume) was charged with a magnetic stirring bar, **B2** (1.2 mmol), PhI (1 mmol), CuI (0.05 mmol), *N,N*-dimethylglycine (0.1 mmol),  $\text{K}_2\text{CO}_3$  (2 mmol), and DMF (0.5 mL). Then the seal

tube was closed tightly with a rubber stopper, removed from the glove box and immersed into a pre-heated metal bath (110 °C) for 48 hours. After the reaction was finished, the mixture was cooled to room temperature sat. aq. NH<sub>4</sub>Cl (5 mL) was then added. The mixture was extracted with DCM (3 × 5 mL) and the combined organics were washed with brine (5 mL), dried over Na<sub>2</sub>SO<sub>4</sub>. A small aliquot of the organic phase was analyzed by GC and GC-MS to monitor product formation. Then the solvent was evaporated under reduced pressure and the residue was purified by flash column chromatography (petroleum ether/ethyl acetate = 10:1 – 2:1, DCM 2%) on silica gel to give the corresponding products **D3**.

***N*-Phenyl-*N*-(*p*-tolyl)formamide (**D3**):**<sup>14</sup>

<sup>1</sup>H NMR (400 MHz, CDCl<sub>3</sub>) δ 8.68 (s, 1H), 8.63 (s, 1H), 7.46–7.35 (m, 5H), 7.35–7.27 (m, 5H), 7.23 (s, 2H), 7.20–7.13 (m, 4H), 7.13–7.06 (m, 2H), 2.38 (s, 3H), 2.36 (s, 3H);

<sup>13</sup>C NMR (101 MHz, CDCl<sub>3</sub>) δ 161.7, 141.8, 139.7, 139.1, 137.1, 136.9, 130.5, 129.7, 129.6, 129.0, 126.8, 126.5, 126.2, 125.7, 125.3, 124.6, 29.7, 21.1, 20.8;

HRMS (ESI) calcd. for C<sub>14</sub>H<sub>14</sub>NO [M+H]: 212.1075, found: 212.1078

## 8.5 Synthesis of **D4**

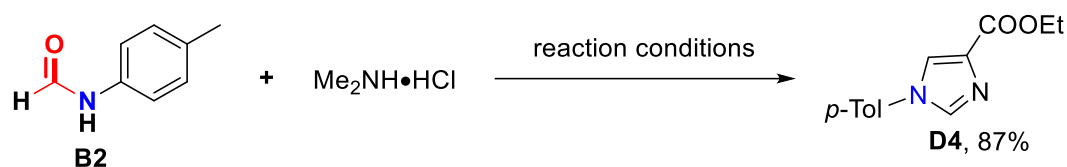

Using a nitrogen-filled glove box, an oven-dried pressure tube (38 mL volume) was charged with a magnetic stirring bar, **B2** (1.0 mmol), pyridine (1.5 mL), DPPA (2.0 mmol). Then the seal tube was closed tightly with a rubber stopper, removed from the glove box and immersed into a pre-heated metal bath (90 °C) for 24 hours. After the reaction was finished, the mixture was cooled to room temperature sat. aq. NH<sub>4</sub>Cl (5 mL) was then added. The mixture was extracted with DCM (3 × 5 mL) and the combined organics were washed with brine (5 mL), dried over Na<sub>2</sub>SO<sub>4</sub>. A small aliquot of the organic phase was analyzed by GC and GC-MS to monitor product formation. Then the solvent was evaporated under reduced pressure and the residue was purified by flash column chromatography (petroleum ether/ethyl acetate = 10:1 – 1:1, DCM 2%) on silica gel to give the corresponding products **D4**.

**ethyl 1-(*p*-tolyl)-1H-imidazole-4-carboxylate (**D4**):**<sup>15</sup>

**<sup>1</sup>H NMR** (400 MHz, CDCl<sub>3</sub>) δ 7.88 (d, *J* = 1.3 Hz, 1H), 7.78 (d, *J* = 1.2 Hz, 1H), 7.26 (s, 2H), 4.37 (q, 2H), 2.38 (s, 3H), 1.37 (t, *J* = 7.1 Hz, 3H);

**<sup>13</sup>C NMR** (101 MHz, CDCl<sub>3</sub>) δ 162.7, 138.5, 136.2, 134.9, 134.0, 130.6, 124.0, 121.6, 60.7, 21.0, 14.3;

**HRMS** (ESI) calcd. for C<sub>13</sub>H<sub>15</sub>N<sub>2</sub>O<sub>2</sub> [M+H]: 231.1134, found: 231.1133.

## 8.6 Synthesis of D5

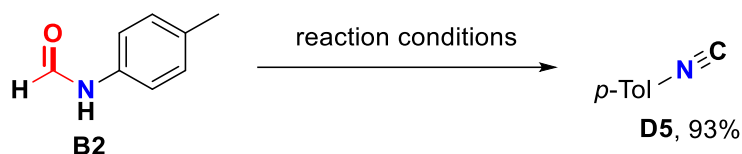

To a stirring 0 °C mixture of DIPA (2.7 equiv, 0.26 mL) and **B2** (1 mmol g) in DCM (0.9 M), as added POCl<sub>3</sub> (1.1 mmol) dropwise under argon. After 5 min at 0°C and 15 min at room temperature, 1 mL water was added and mixed vigorously until the organic layer became clear. The mixture was extracted with DCM (3 × 2 mL) and the combined organics were washed with brine (2 mL), dried over Na<sub>2</sub>SO<sub>4</sub>. A small aliquot of the organic phase was analyzed by GC and GC-MS to monitor product formation. Then the solvent was evaporated under reduced pressure and the residue was purified by flash column chromatography (petroleum ether/ethyl acetate = 10:1 – 4:1) on silica gel to give the corresponding products **D5**.

### 4-methylphenyl isocyanide (**D5**):<sup>16</sup>

**<sup>1</sup>H NMR** (400 MHz, CDCl<sub>3</sub>) δ 7.25 (d, *J* = 8.4 Hz, 2H), 7.22 (d, *J* = 8.4 Hz, 2H), 4.59 (s, 2H), 2.38 (s, 3H);

**<sup>13</sup>C NMR** (101 MHz, CDCl<sub>3</sub>) δ 157.2 (t, *J* = 5.2 Hz), 138.2, 129.5, 126.6, 45.3 (t, *J* = 7.1 Hz), 21.0;

**HRMS** (ESI) calcd. for C<sub>8</sub>H<sub>9</sub>N [M+H-HCN]: 105.0699, found: 105.0694.

## 8.7 Synthesis of D6

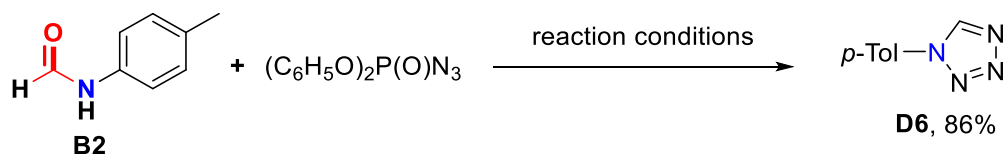

Using a nitrogen-filled glove box, an oven-dried pressure tube (38 mL volume) was charged with a magnetic stirring bar, **B2** (1.0 mmol), pyridine (1.5 mL), DPPA (2.0 mmol). Then the seal tube was closed tightly with a rubber stopper, removed from the

glove box and immersed into a pre-heated metal bath (90 °C) for 24 hours. After the reaction was finished, the mixture was cooled to room temperature sat. aq. NH<sub>4</sub>Cl (5 mL) was then added. The mixture was extracted with DCM (3 × 5 mL) and the combined organics were washed with brine (5 mL), dried over Na<sub>2</sub>SO<sub>4</sub>. A small aliquot of the organic phase was analyzed by GC and GC-MS to monitor product formation. Then the solvent was evaporated under reduced pressure and the residue was purified by flash column chromatography (petroleum ether/ethyl acetate = 10:1 – 1:1, DCM 2%) on silica gel to give the corresponding products **D6**.

**1-(*p*-Tolyl)-1H-tetrazole (D6):**<sup>15</sup>

<sup>1</sup>H NMR (400 MHz, CDCl<sub>3</sub>) δ 8.95 (s, 1H), 7.57 (d, *J* = 8.4 Hz, 2H), 7.36 (d, *J* = 8.5 Hz, 2H), 2.44 (s, 3H);

<sup>13</sup>C NMR (101 MHz, CDCl<sub>3</sub>) δ 140.4, 140.4, 130.7, 121.0, 21.2;

HRMS (ESI) calcd. for C<sub>8</sub>H<sub>9</sub>N<sub>4</sub> [M+H]: 161.0827, found: 161.0826.

## 9. References

- (1) Jia, M.; Zhang, H.; Lin, Y.; Chen, D.; Chen, Y.; Xia, Y. *Org. Biomol. Chem.* **2018**, *16*, 3615 – 3624.
- (2) Nguyen, T. V. Q.; Yoo, W.-J.; Kobayashi. *Angew. Chem., Int. Ed.* **2011**, *54*, 9209 – 9212.
- (3) Wang, C.; Wu, L.; Xu, W.; He, F.; Qu, J.; Chen, Y. *Org. Lett.* **2020**, *22*, 6954 – 6959.
- (4) Yu, Y.; Zhang, Y.; Sun, C.; Shi, L.; Wang, W.; Li, H. *J. Org. Chem.* **2020**, *85*, 2725 – 2732.
- (5) Ghosh, T.; Jana, S.; Dash, J. *Org. Lett.* **2019**, *21*, 6690 – 6694.
- (6) Yin, J.; Zhang, J.; Cai, C.; Deng, G.-J.; Gong, H. *Org. Lett.* **2019**, *21*, 387 – 392.
- (7) Tan, Z.; Li, Z.; Ma, Y.; Qin, J.; Yu, C. *Eur. J. Org. Chem.* **2019**, *28*, 4538 – 4545.
- (8) Shen, N.; Zhai, S.-J.; Cheung, C.; Ma, J.-A. *Chem. Commun.* **2020**, *56*, 9620 – 9623.
- (9) Ortega, N.; Richter, C.; Glorius, F. *Org. Lett.* **2013**, *15*, 1776 – 1779.
- (10) Kang, B.; Hong, S. H. *Adv. Synth. Catal.* **2015**, *357*, 834 – 840.
- (11) Pathare, S. P.; Jain, A. K. H.; Akamanchi, K. G. *RSC Adv.* **2013**, *3*, 7697 – 7703.
- (12) Houlden, C. E.; Bailey, C. D.; Ford, J. G.; Gagne, M. R.; Lloyd-Jones, G. C.; Booker-Milburn, K. I. *J. Am. Chem. Soc.* **2008**, *130*, 10066 – 10067.
- (13) Wang, H.; Shao, Y.; Zheng, H.; Wang, H.; Cheng, J.; Wan, X. *Chem.–Eur. J.* **2013**, *21*, 18333–18337.
- (14) Natalia, L.; Patricia, G.; Alejandro, B. *J. Org. Chem.* **2020**, *85*, 11072–11079.
- (15) Song, Q.; Wang, Y.; Zhou, Y. *Chem. Commun.* **2020**, *56*, 6106 – 6109.
- (16) Polisar, J.G.; Li, L.; Norton, J. R. *Tetrahedron Lett.* **2011**, *52*, 2933 – 2934.

## 10. NMR Spectra

2021-09-15-yy0009-616-xy-1-10.fid

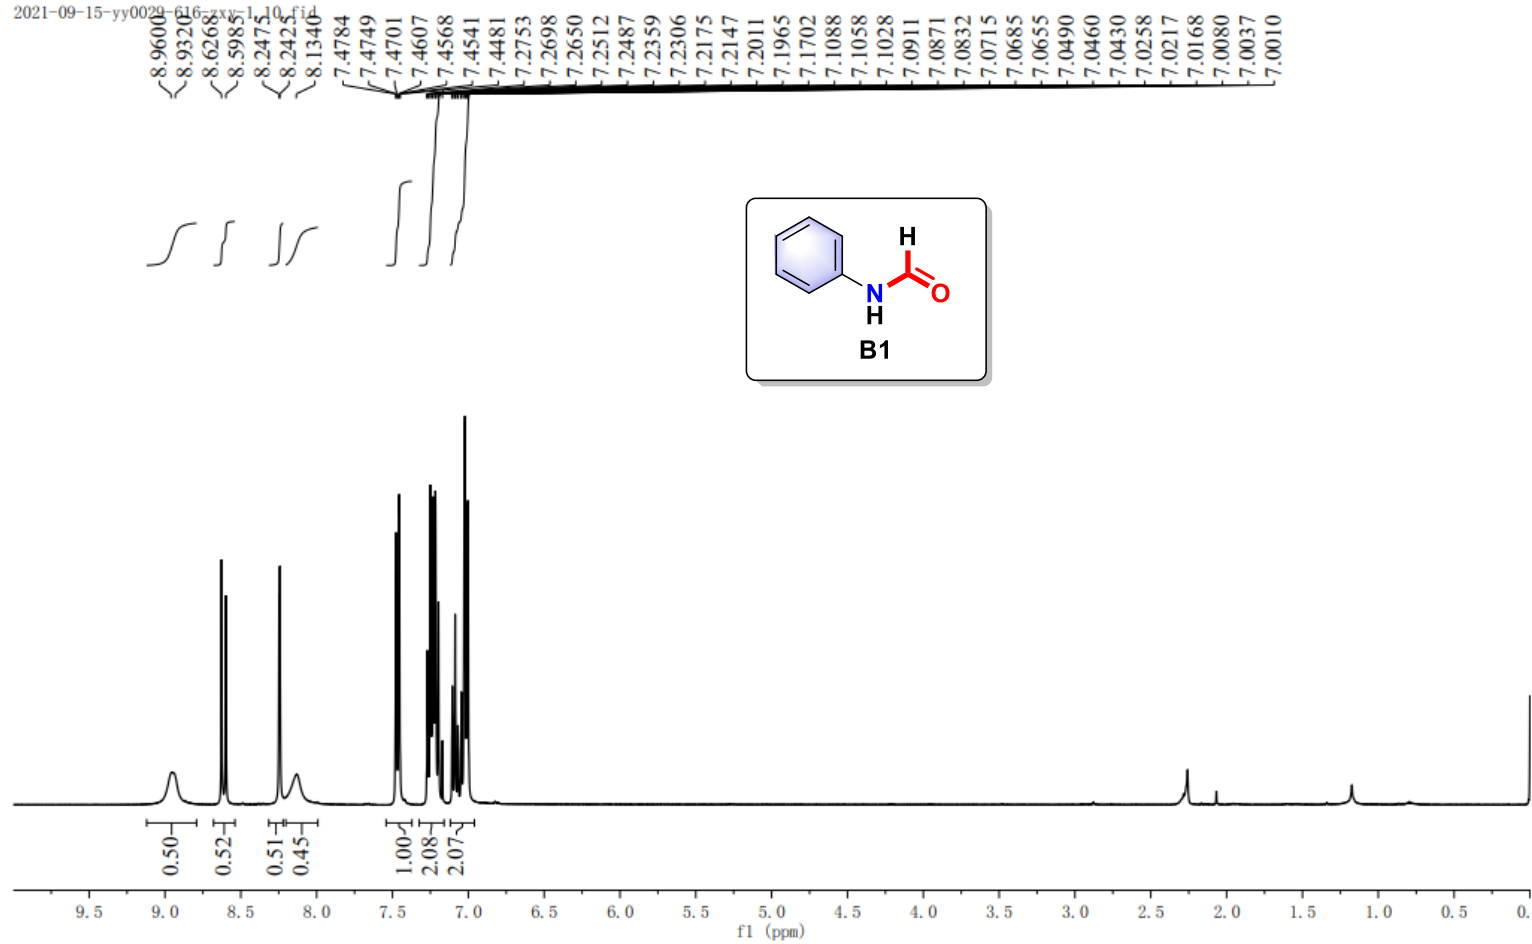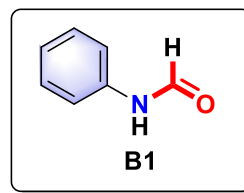

2021-09-18 YY0010-616-zys-1.10.fid

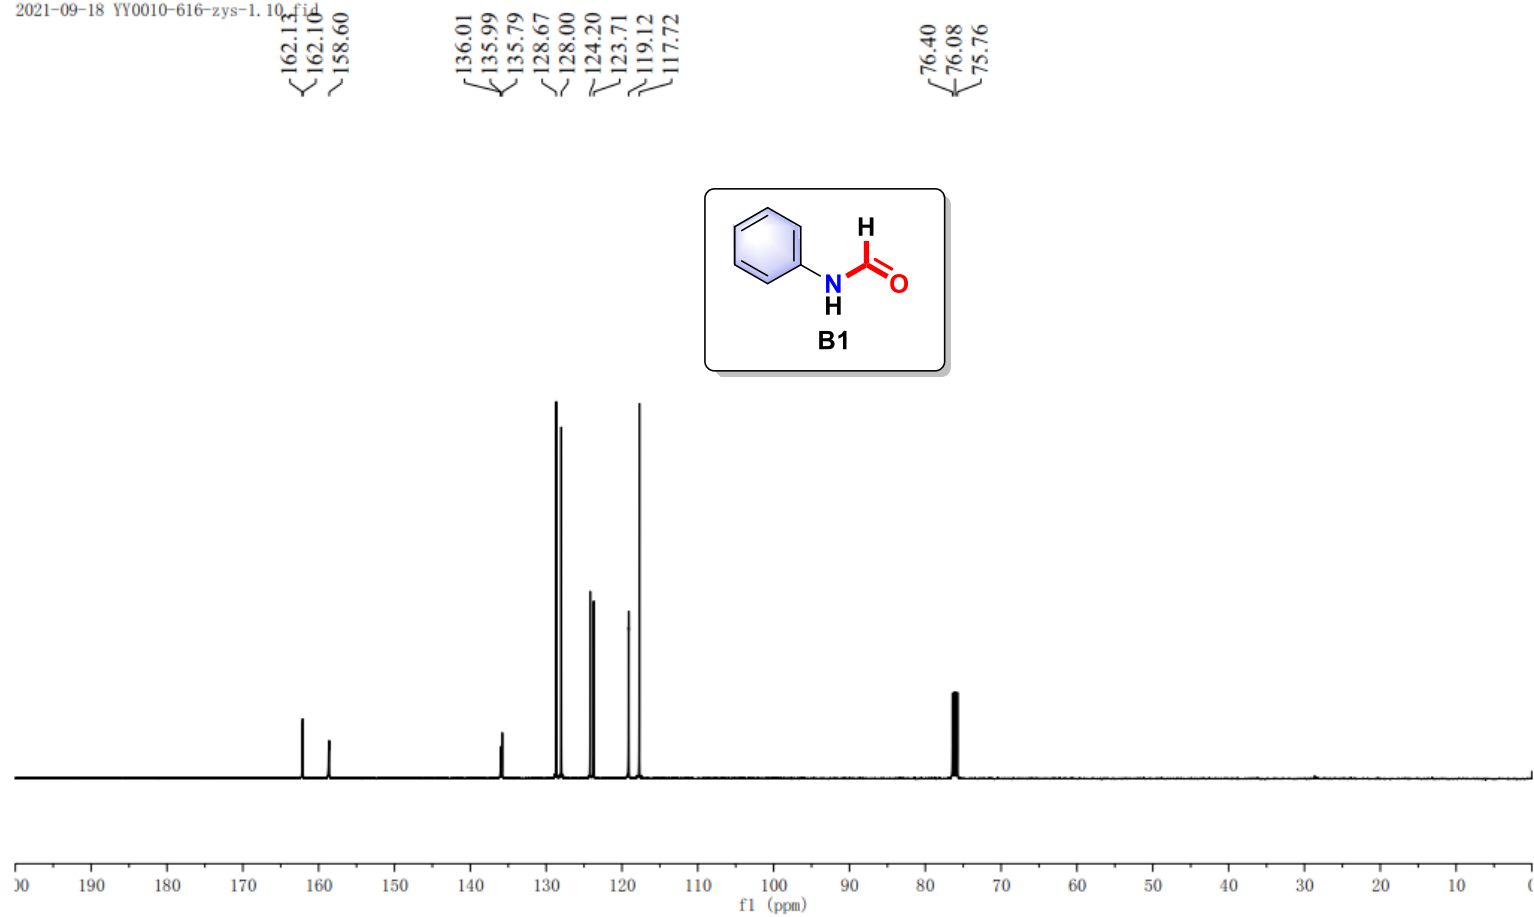

2022-05-16-YY0012-616-ZQL

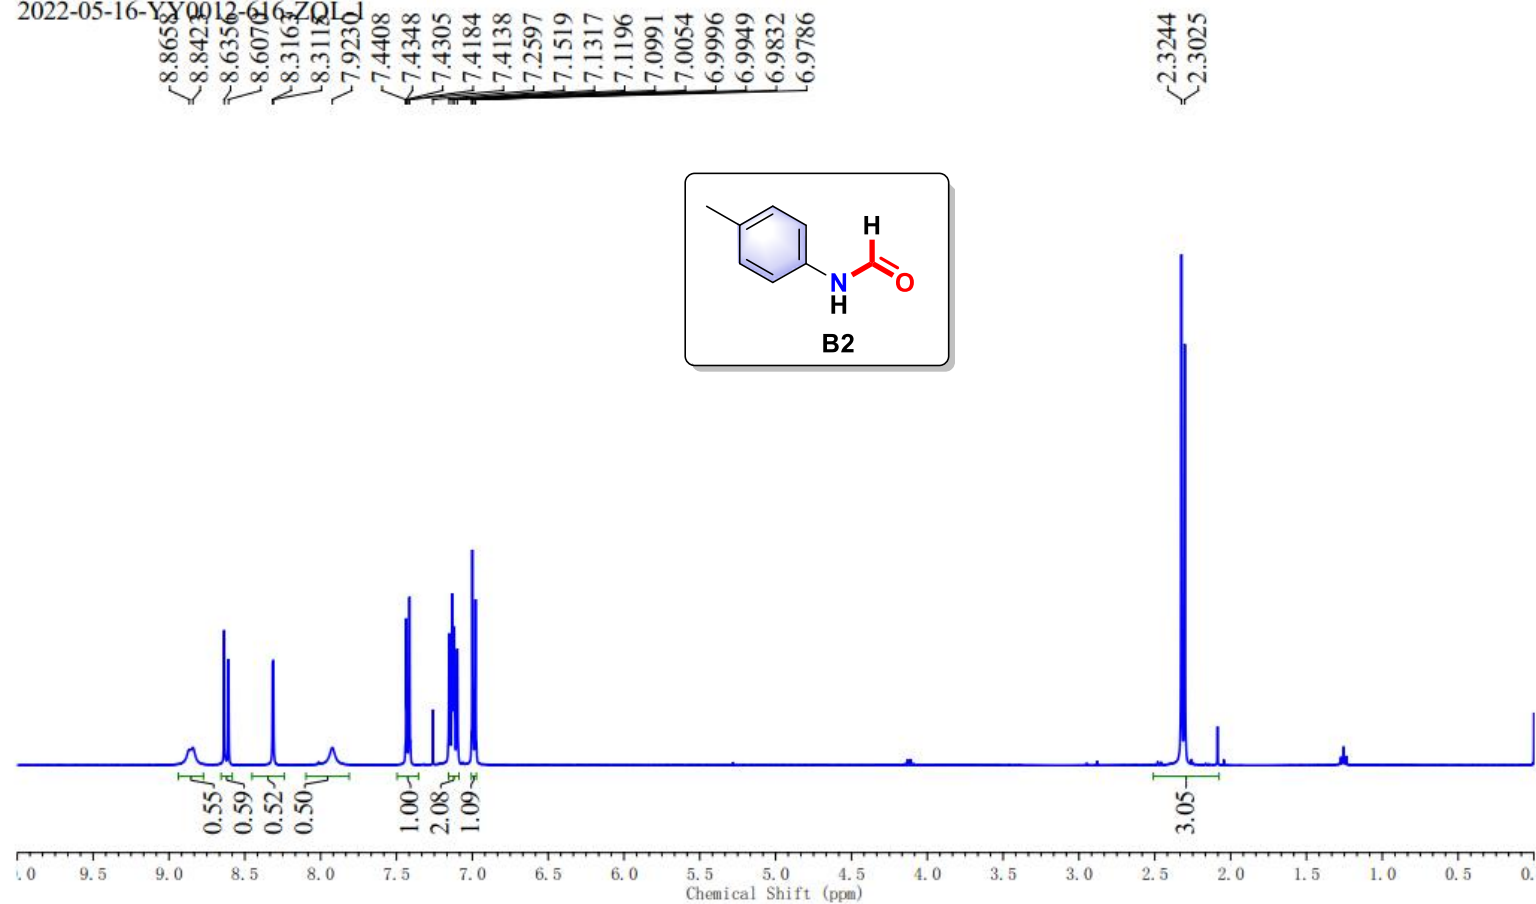

2022-05-17-yy0024-616-zq-1

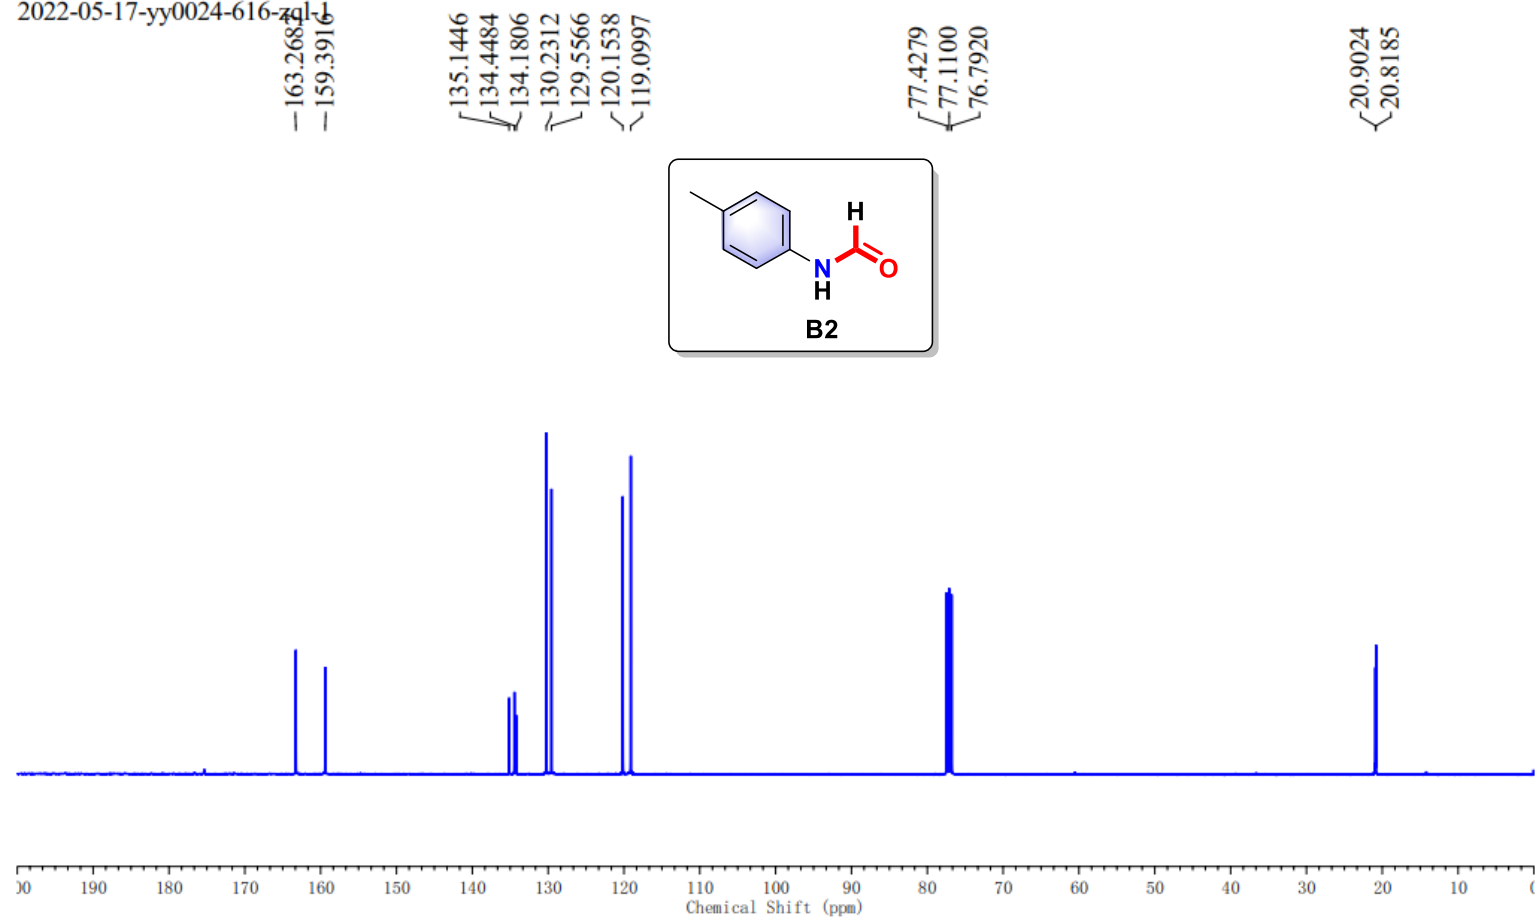

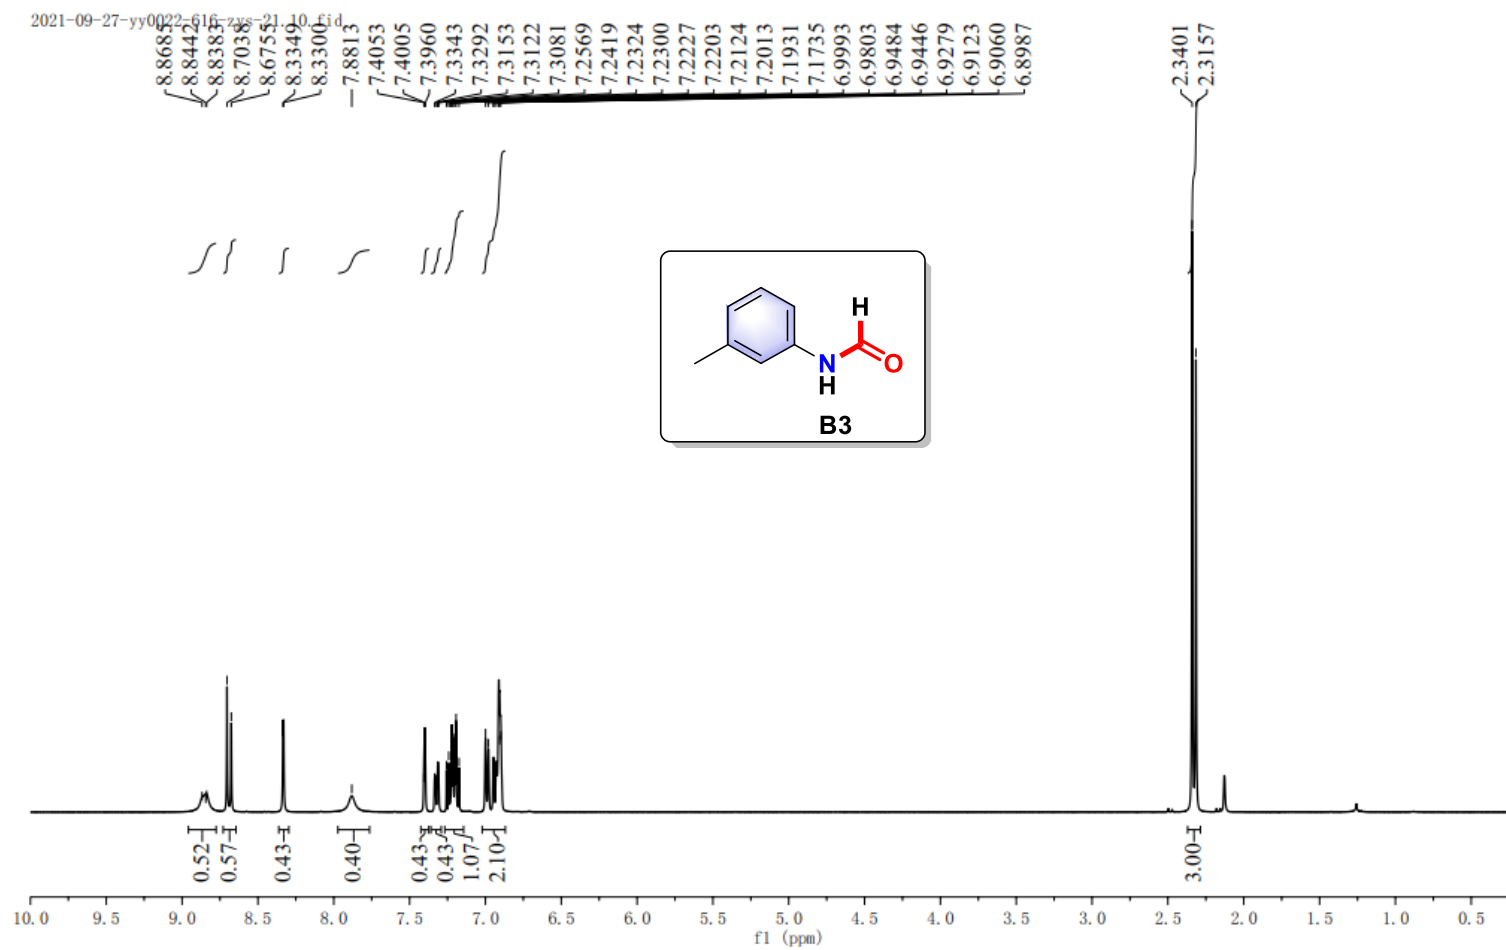

2021-09-29-yy0001-616-zys-21.10.fid

163.09  
159.42

139.84  
139.04  
136.93  
136.76  
129.53  
128.89  
126.04  
125.58  
120.72  
119.48  
117.16  
115.72

77.42  
77.11  
76.79

21.46  
21.40

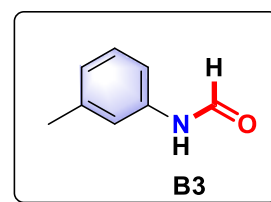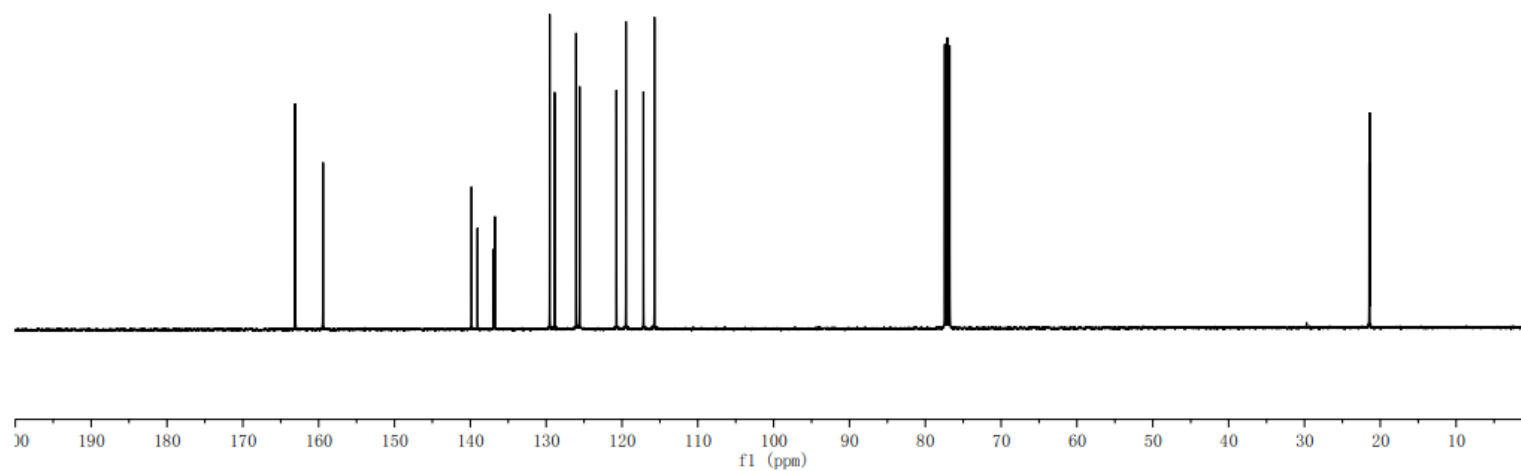

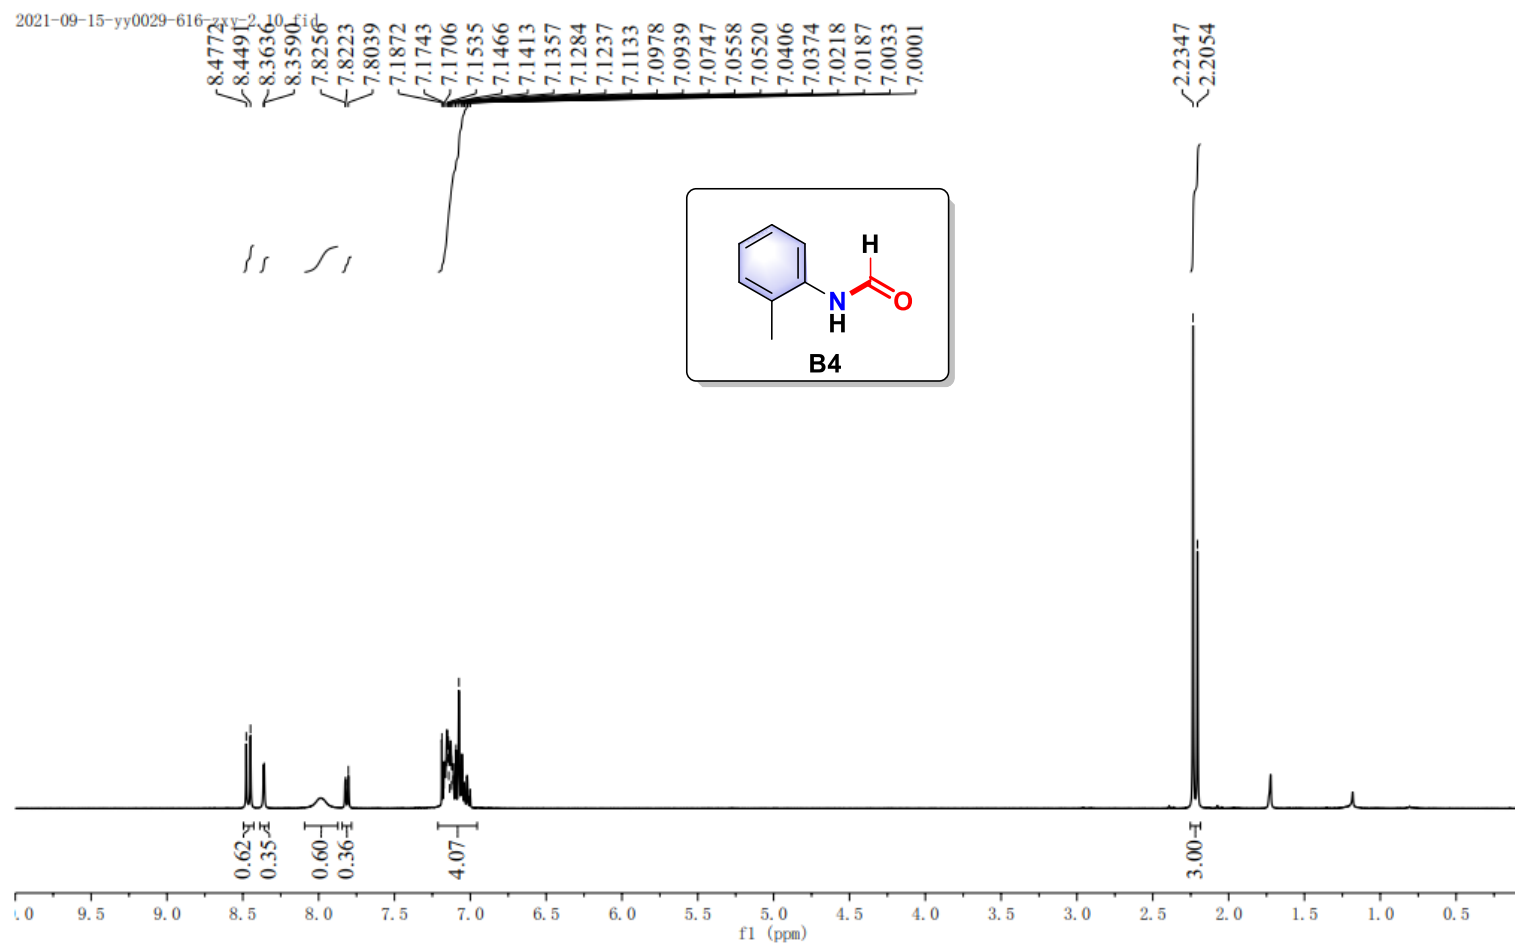

2021-09-18 YY0010-616-zys-2.10.fid

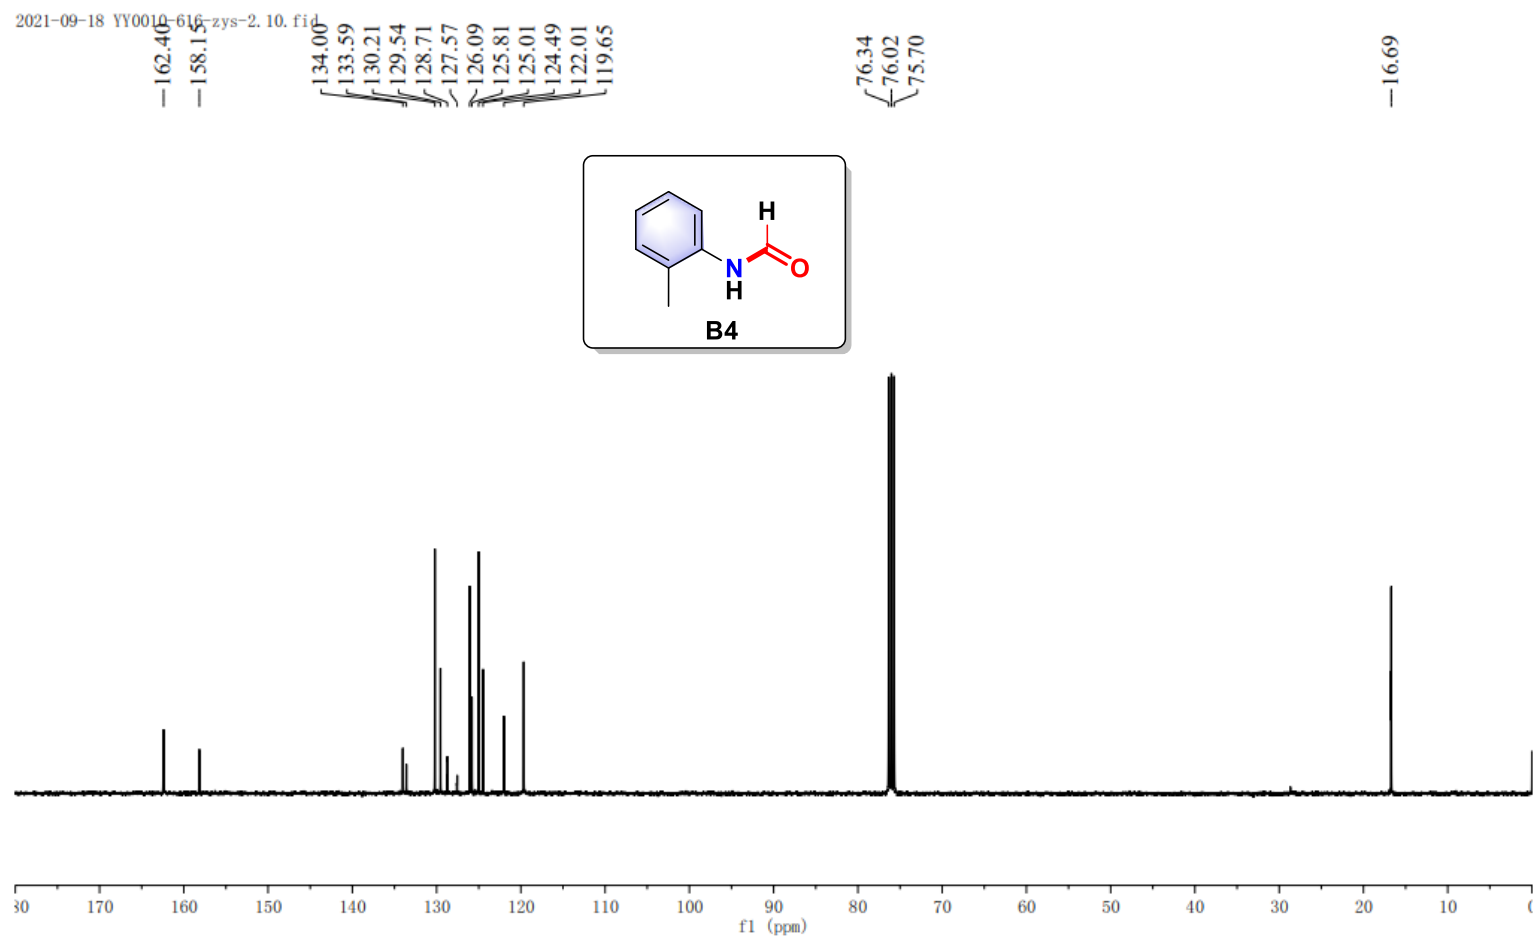

2021-09-30 YY0022 61-zys-29\_10.fid

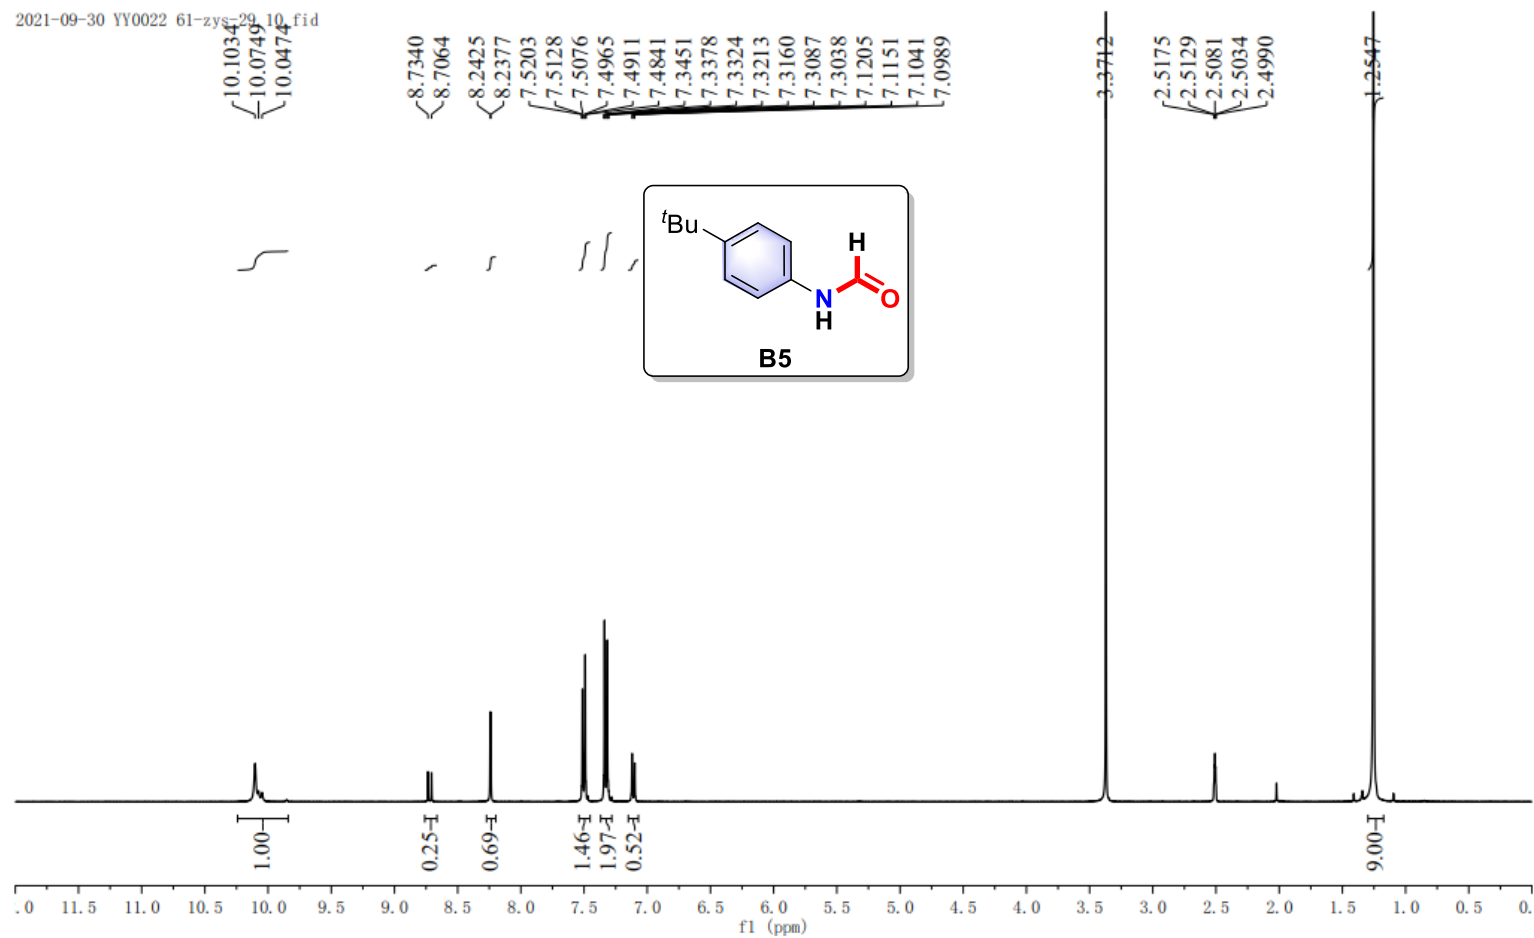

2021-10-08 YY0002 616-zys-29.10.fid

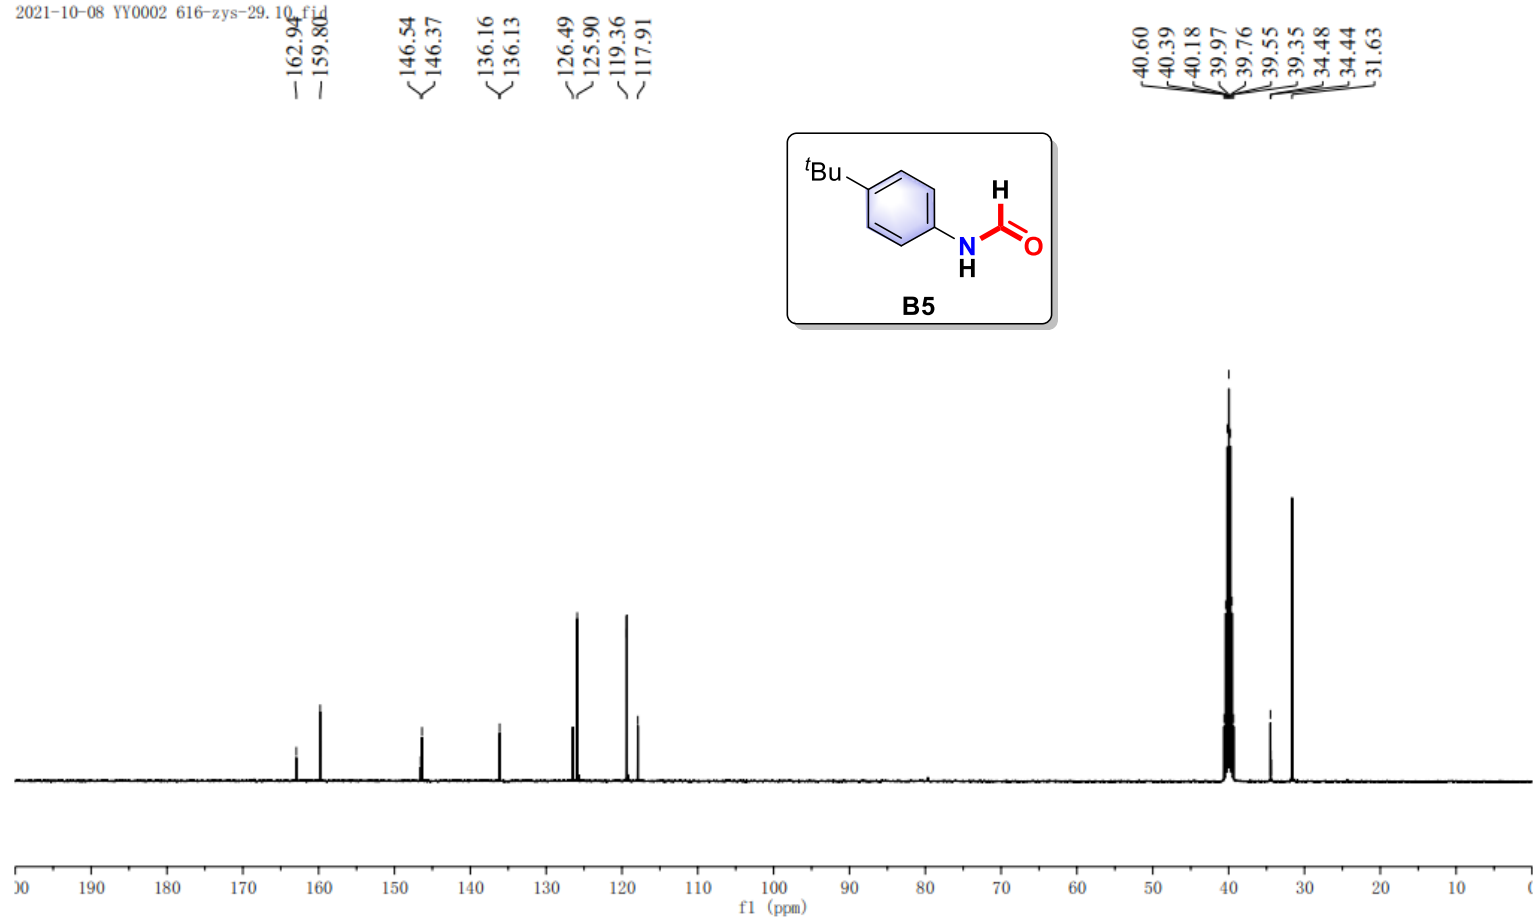

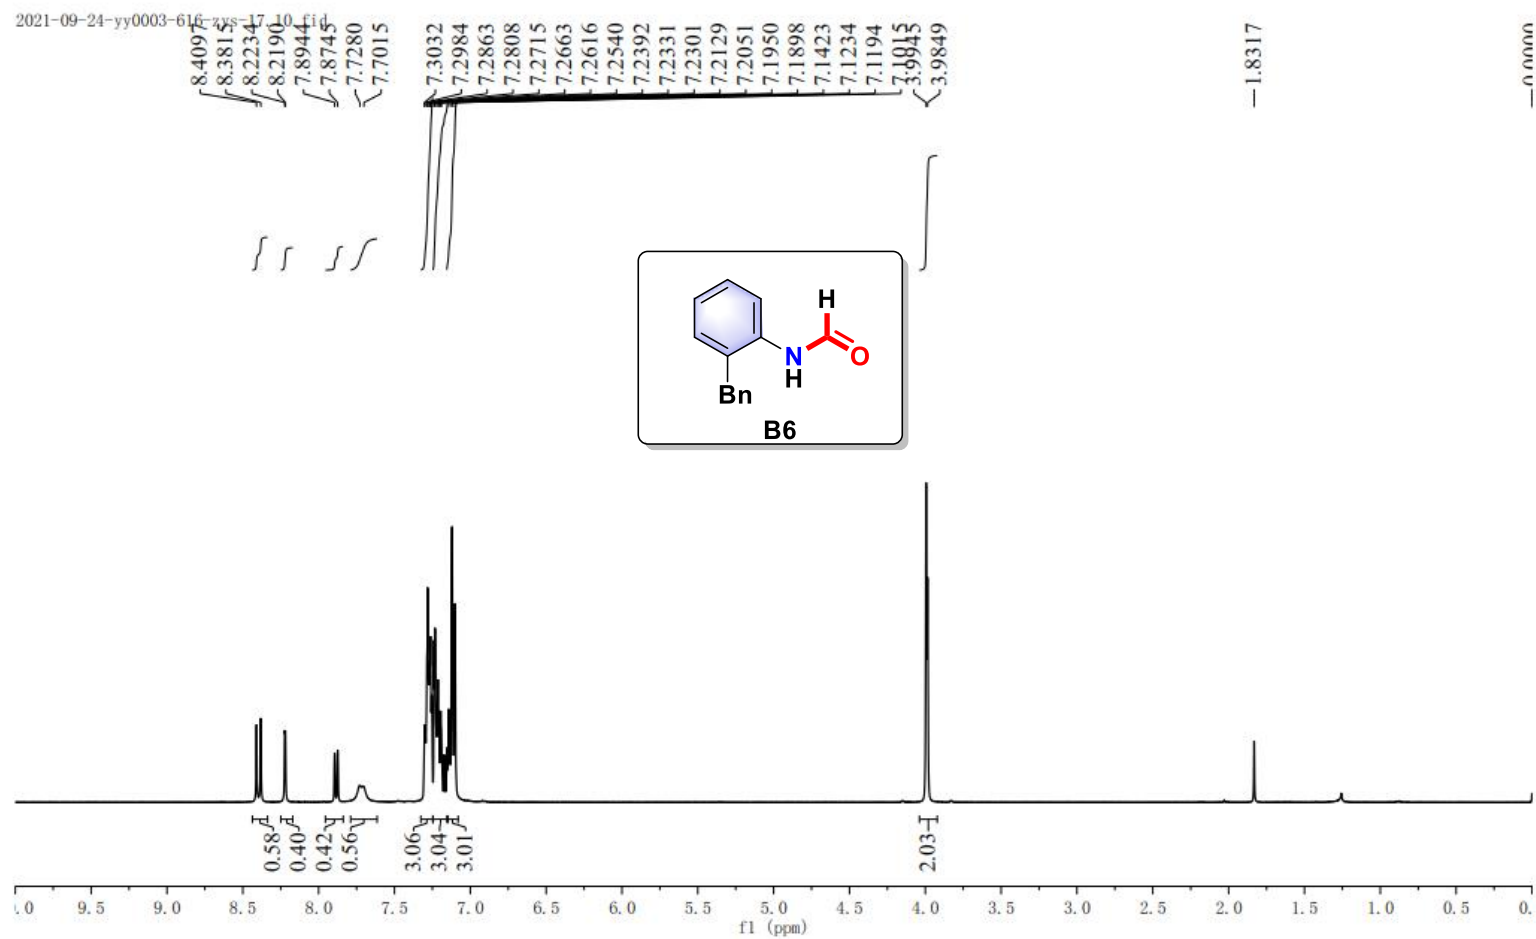

2021-09-25 YY0003 616-zys-17.10\_fid

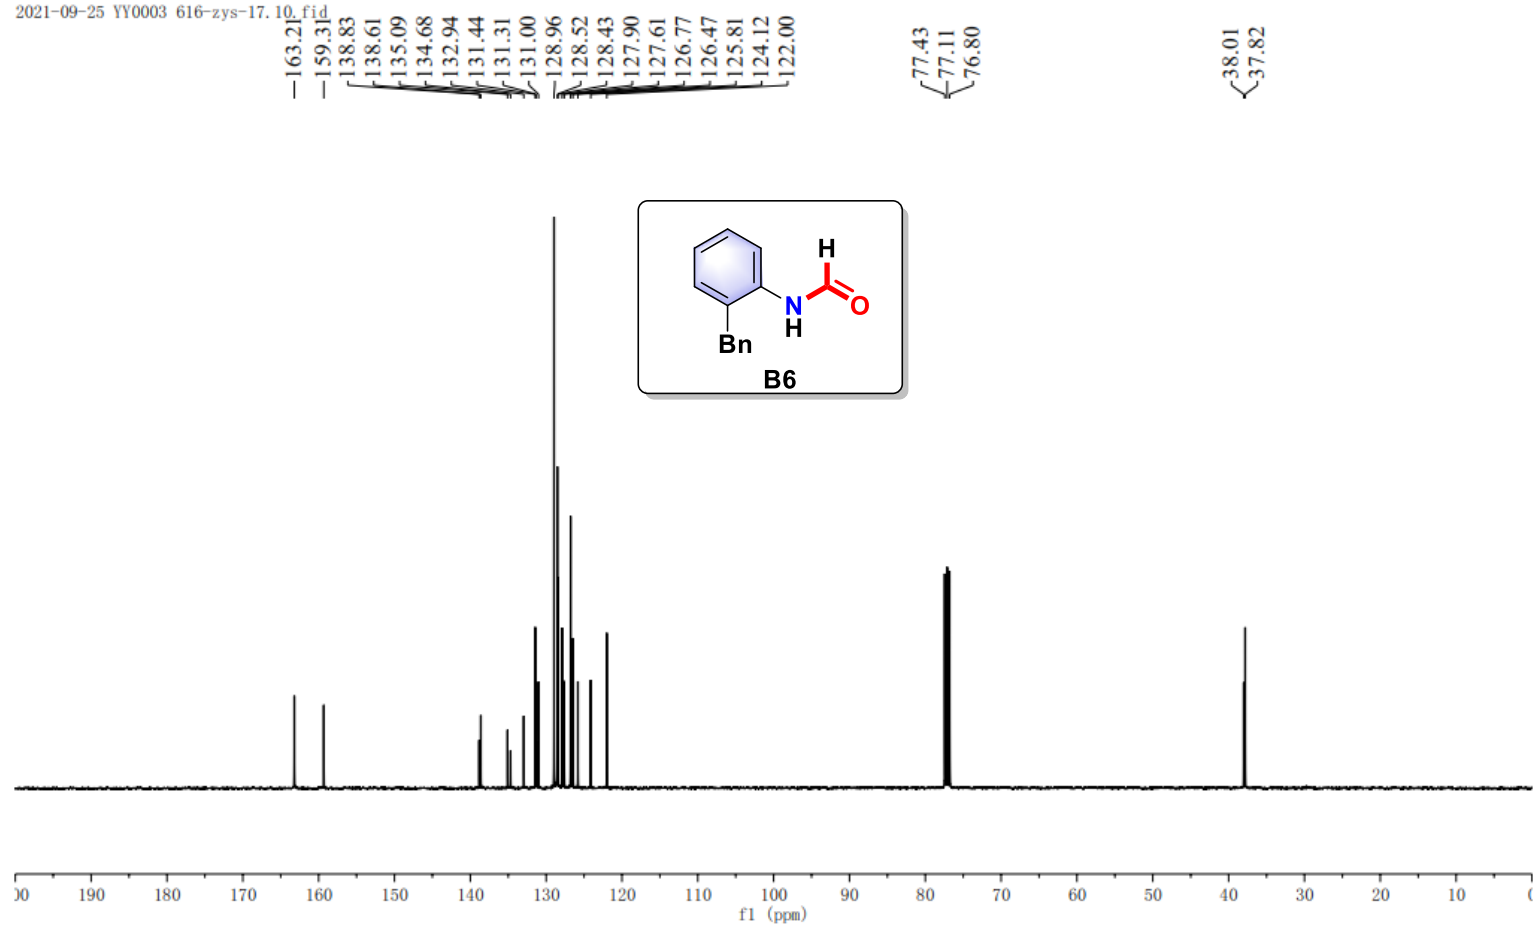

2021-09-24-yy0003-616-zyS-16 10. fid

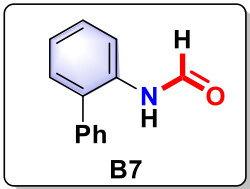

2021-09-25 YY0003 616-zys-16.10.fid

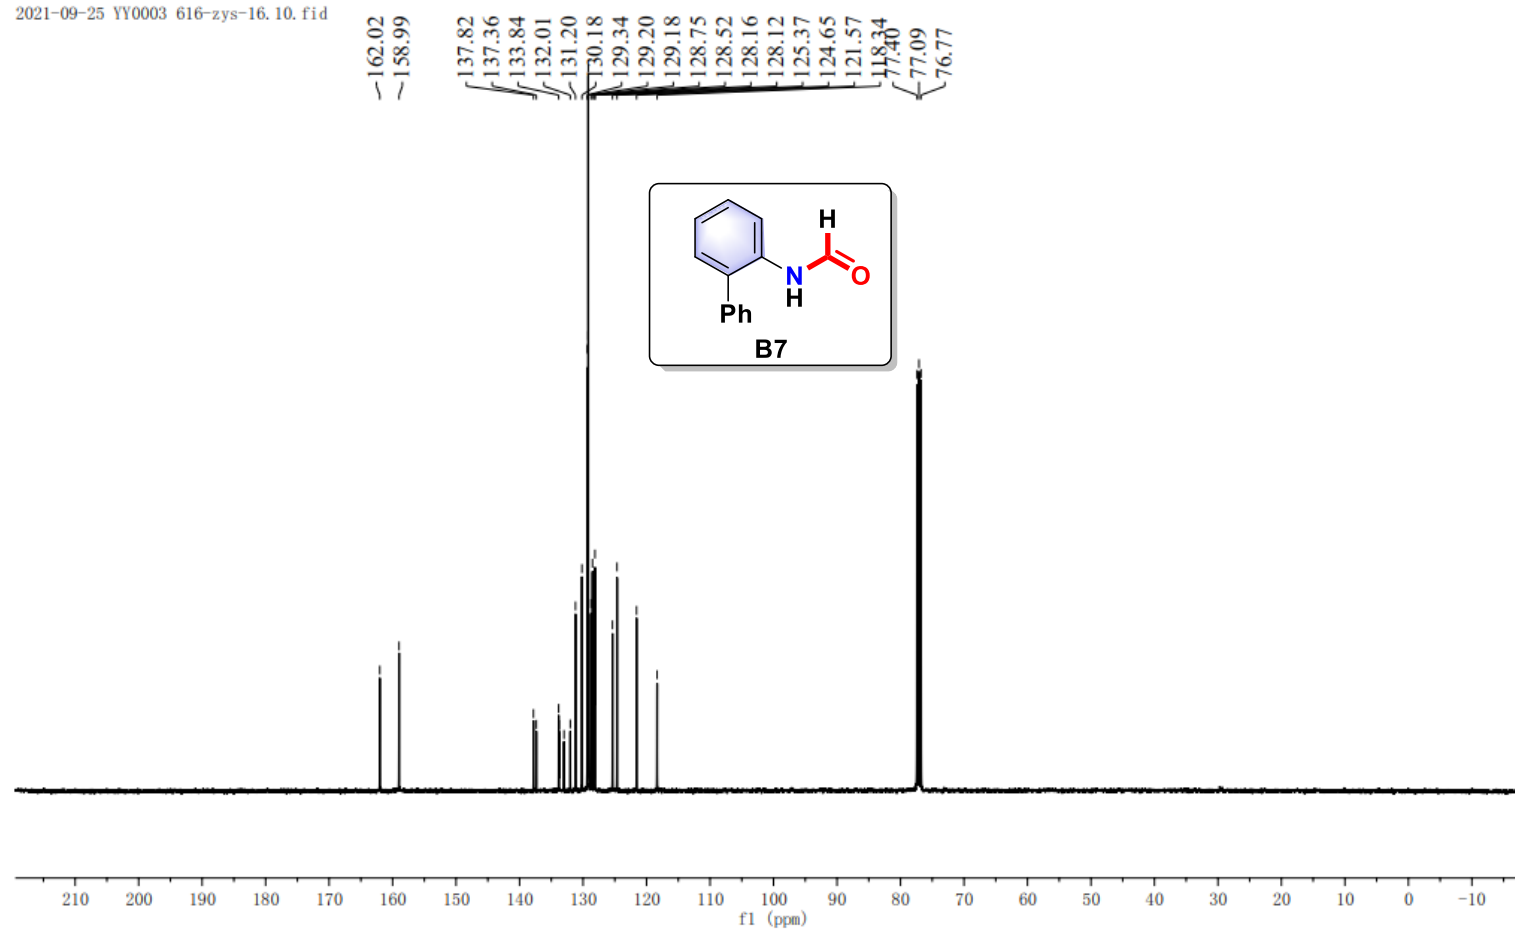

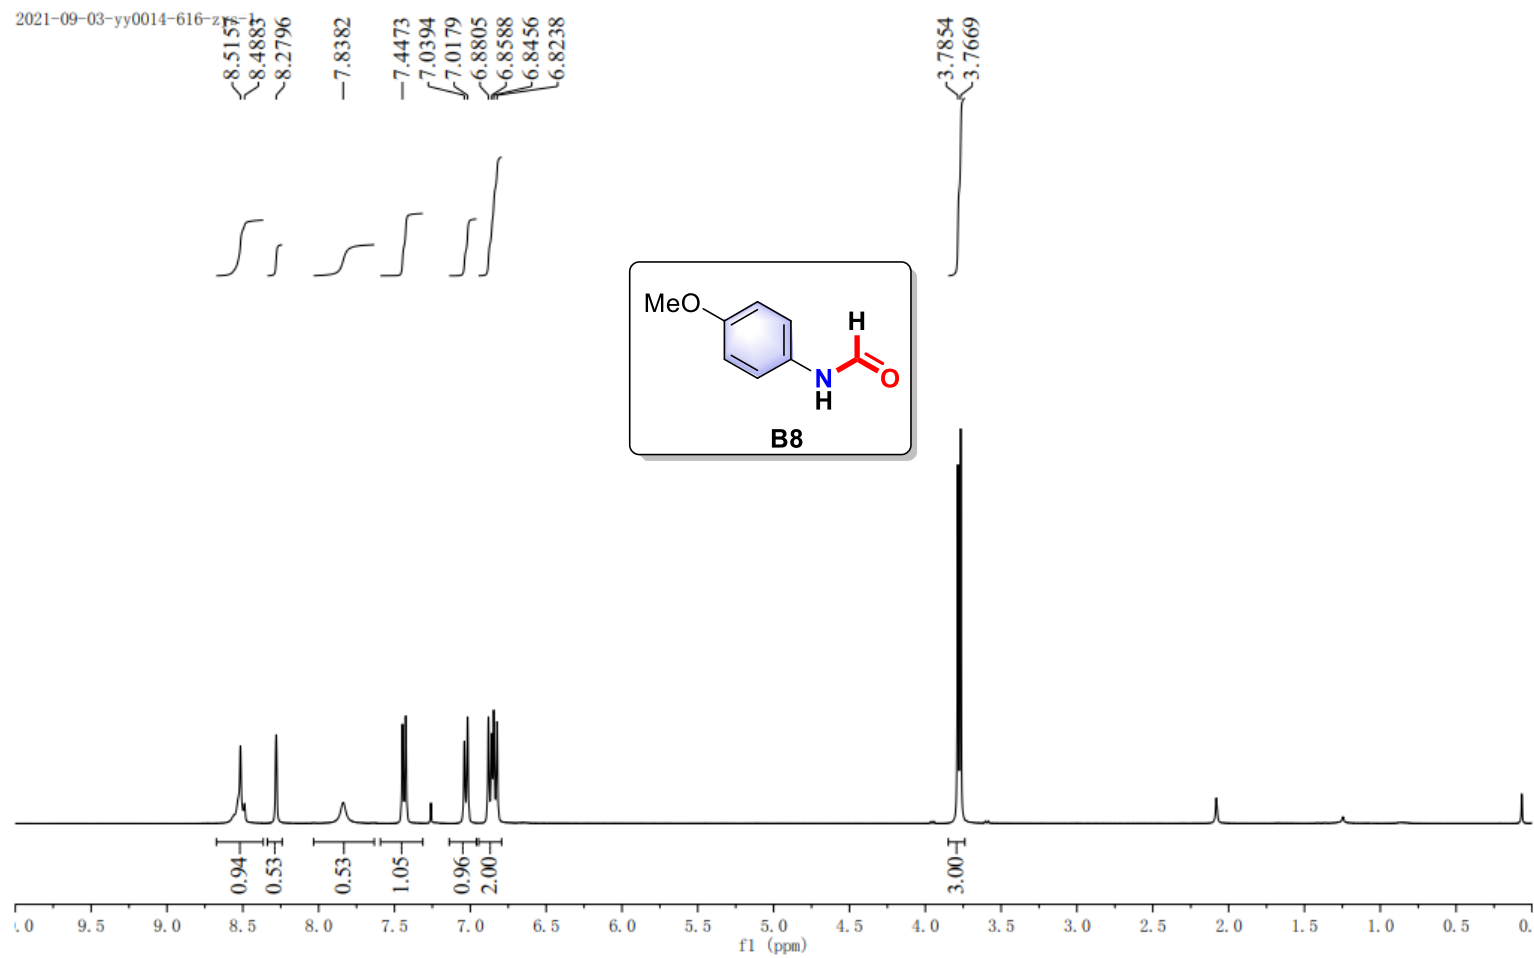

2021-09-03-yy0014-616-zys-1

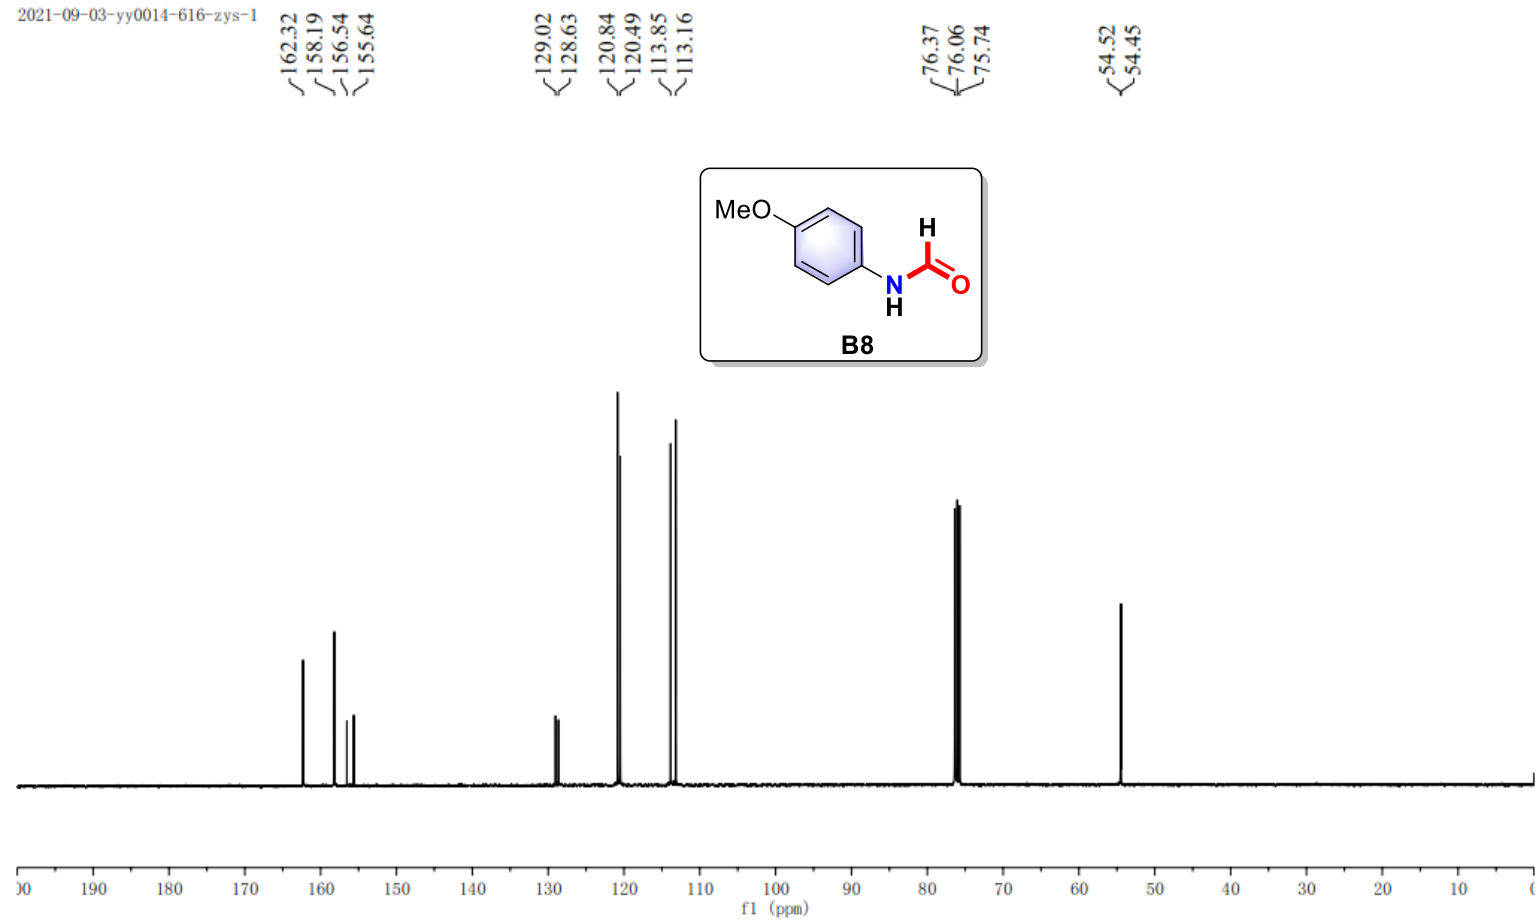

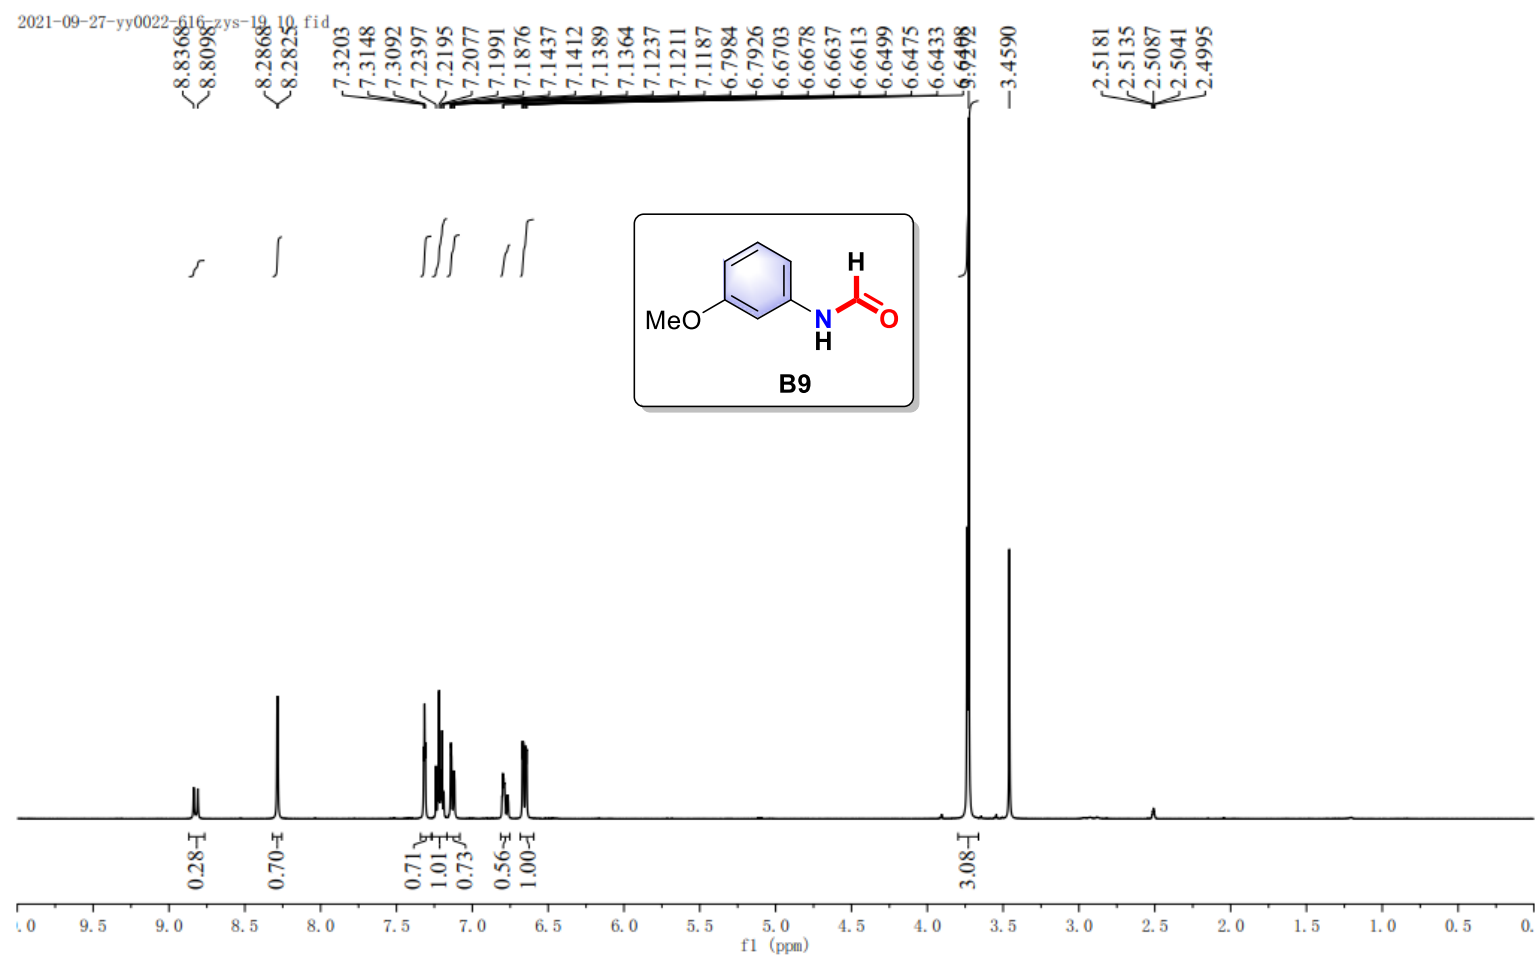

2021-09-29-yy0001-616-zys-19\_10.fid

163.02  
160.57  
160.09  
160.01

140.05  
139.82

130.69  
130.12

111.90  
110.10  
109.43  
105.55  
103.79

55.51  
55.39

40.31  
40.10  
39.89  
39.68  
39.48

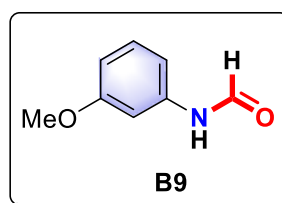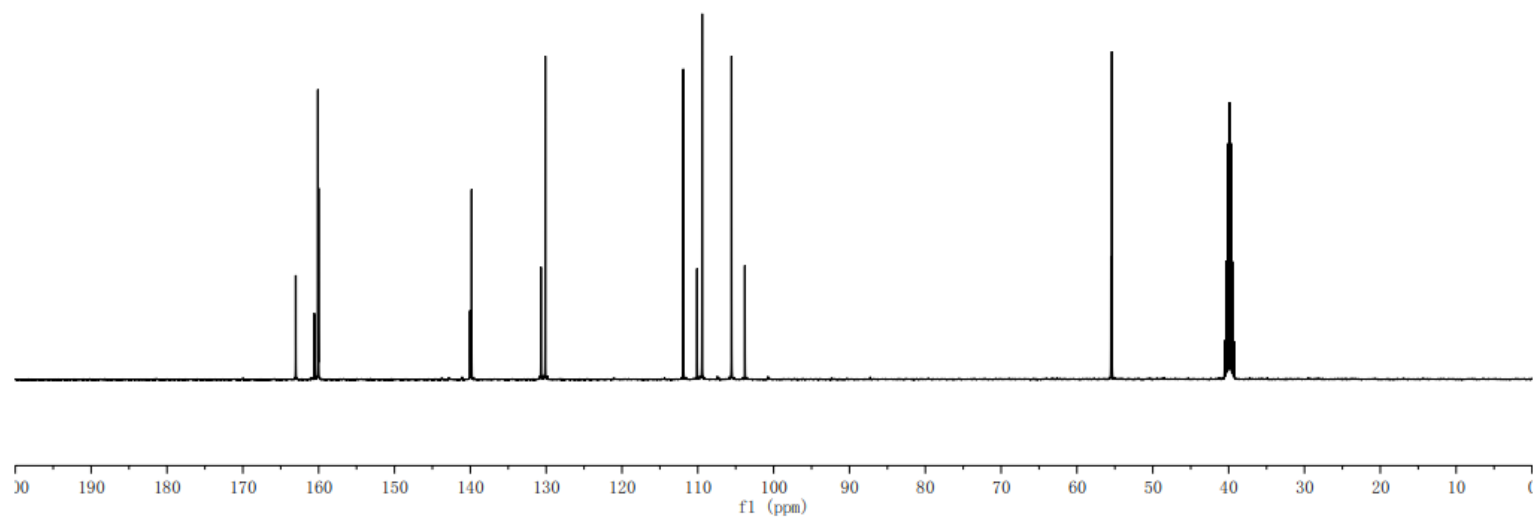

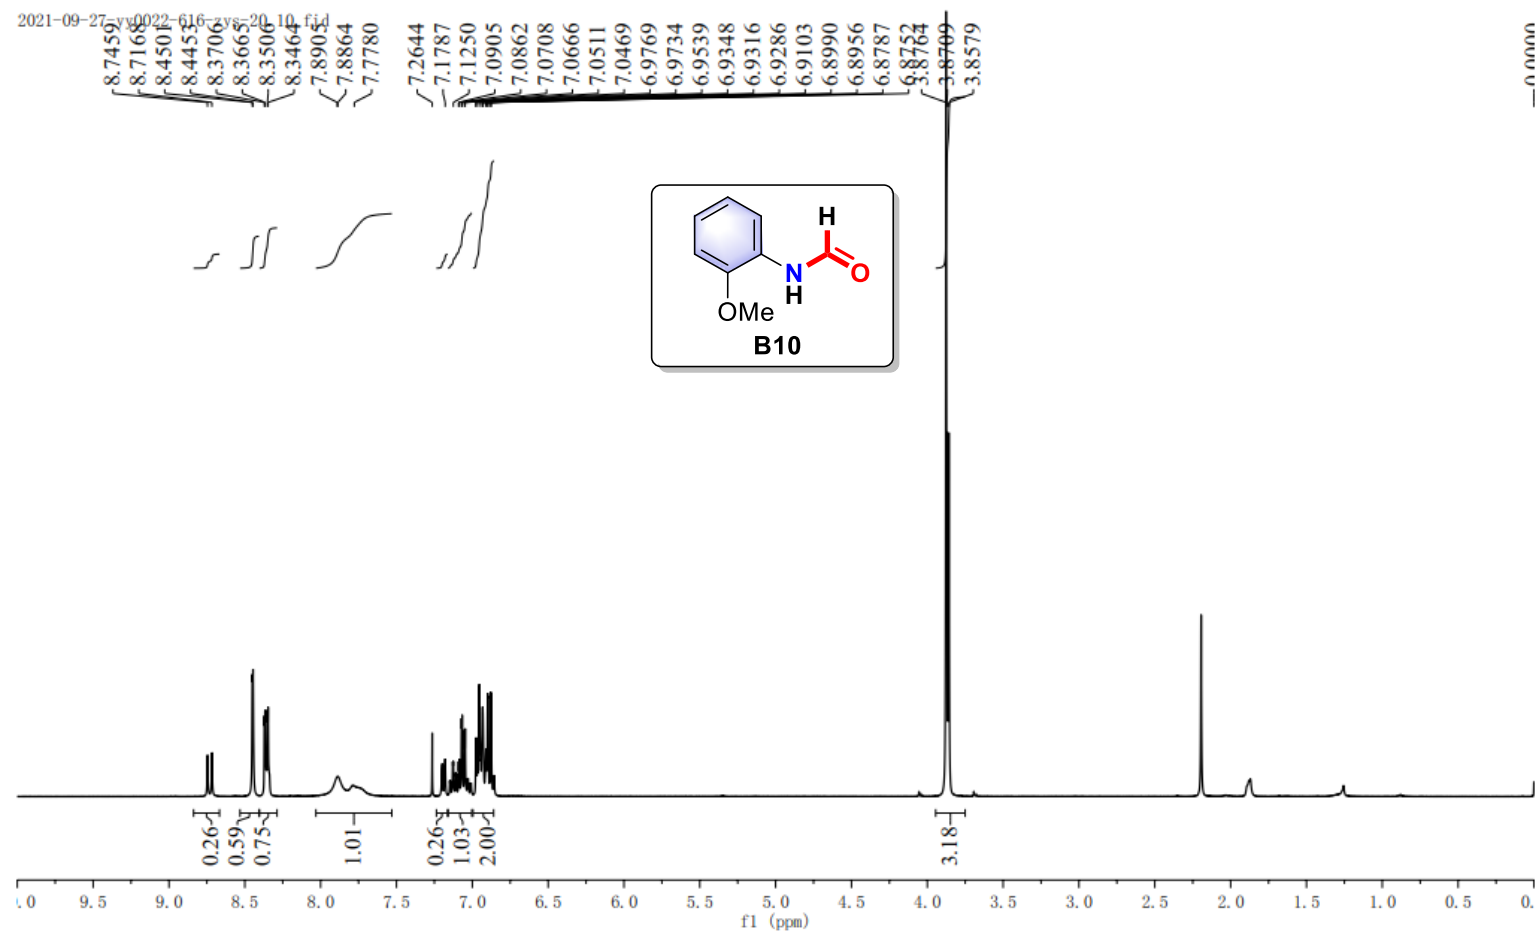

2021-09-29-yy0001-616-zys-20-10.f1

168.24  
161.53  
158.85

148.75  
147.82

127.69  
126.75  
126.17  
125.25  
124.29  
123.62  
121.06  
120.45  
119.79  
116.69  
111.29  
110.07  
109.89

77.42  
77.10  
76.78

55.72  
55.64

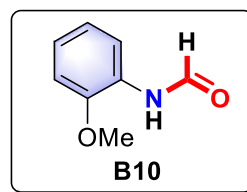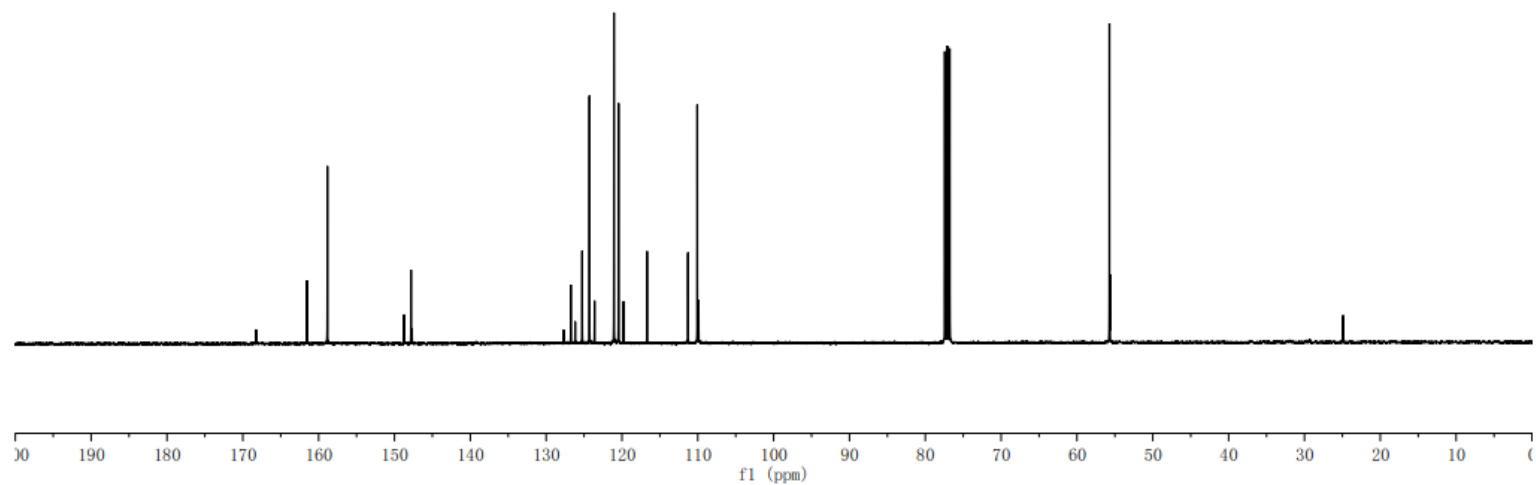

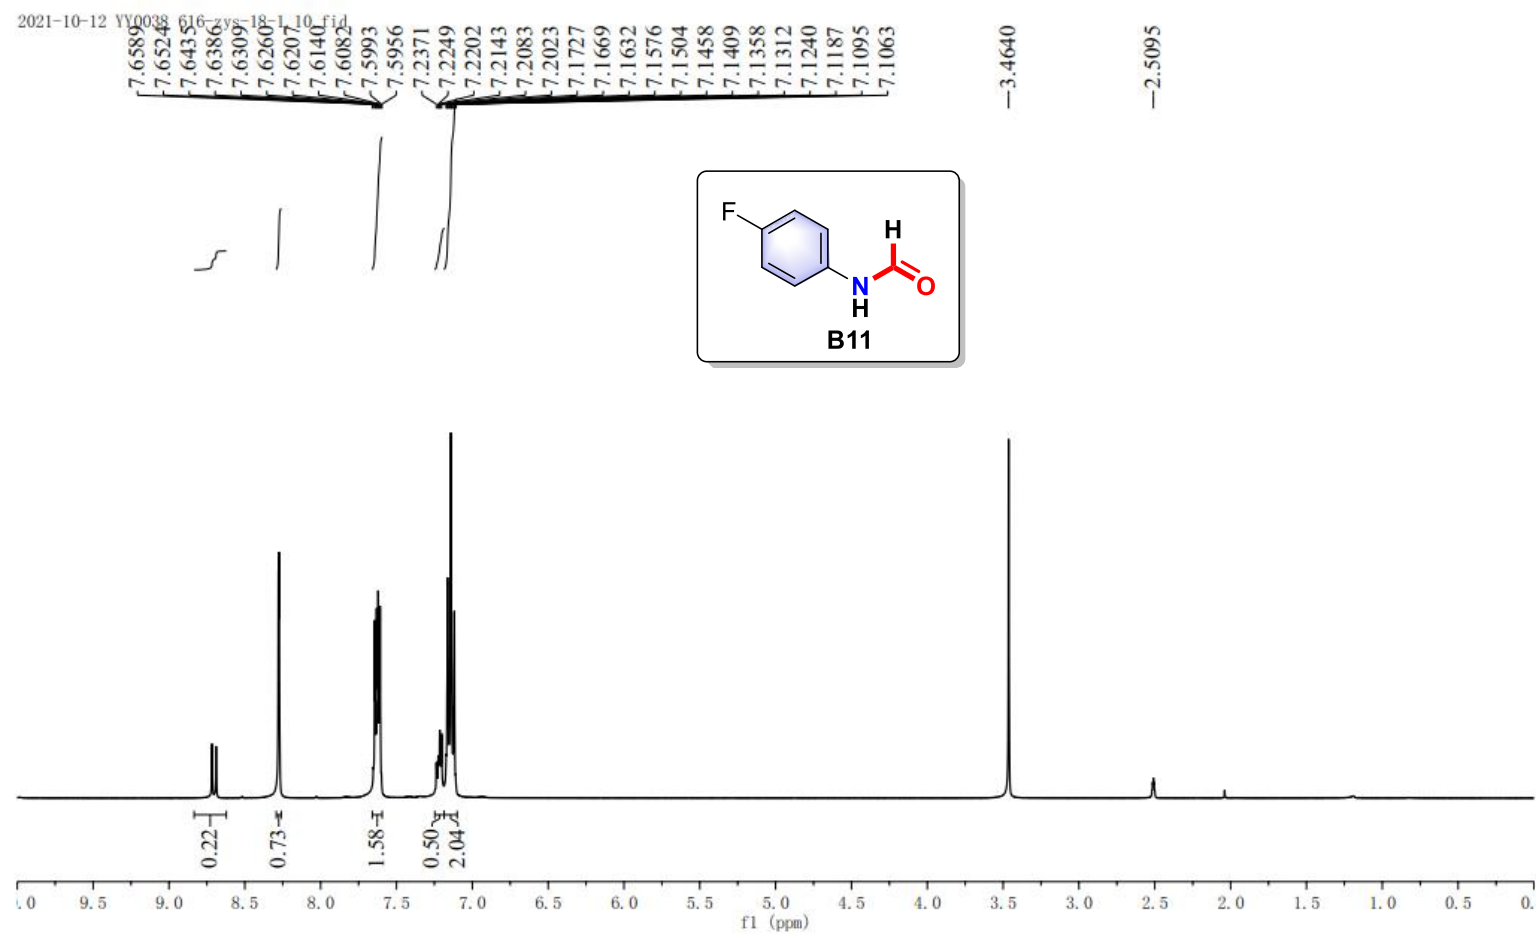

2021-10-12 YY0030 616-zys-18-1.fid

163.115  
160.421  
159.905  
159.788  
158.03  
157.40

135.18  
135.15  
135.10  
135.08  
121.39  
121.31  
120.00  
119.92  
116.52  
116.29  
115.94  
115.72

40.52  
40.31  
40.11  
39.90  
39.69  
39.48  
39.27

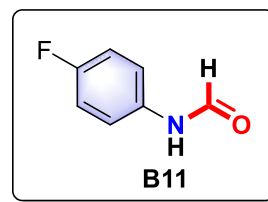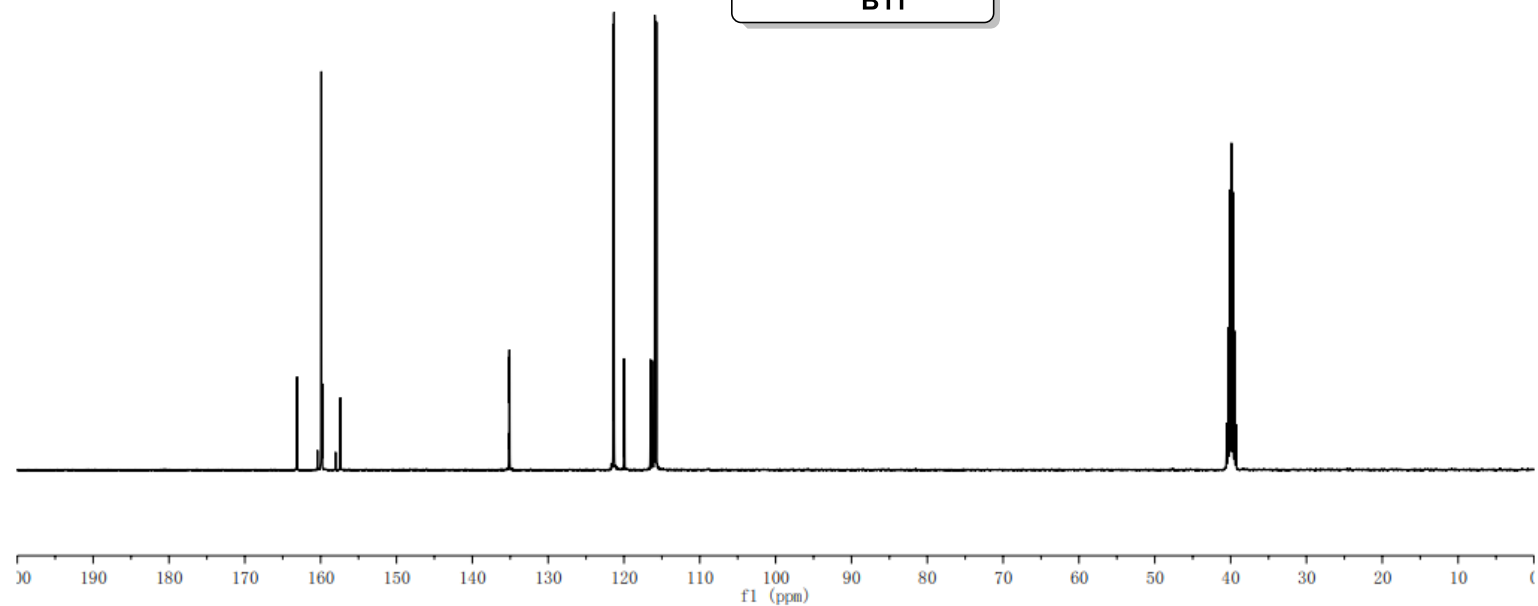

2021-10-16-15 YY0033 616-zys-18-1-F

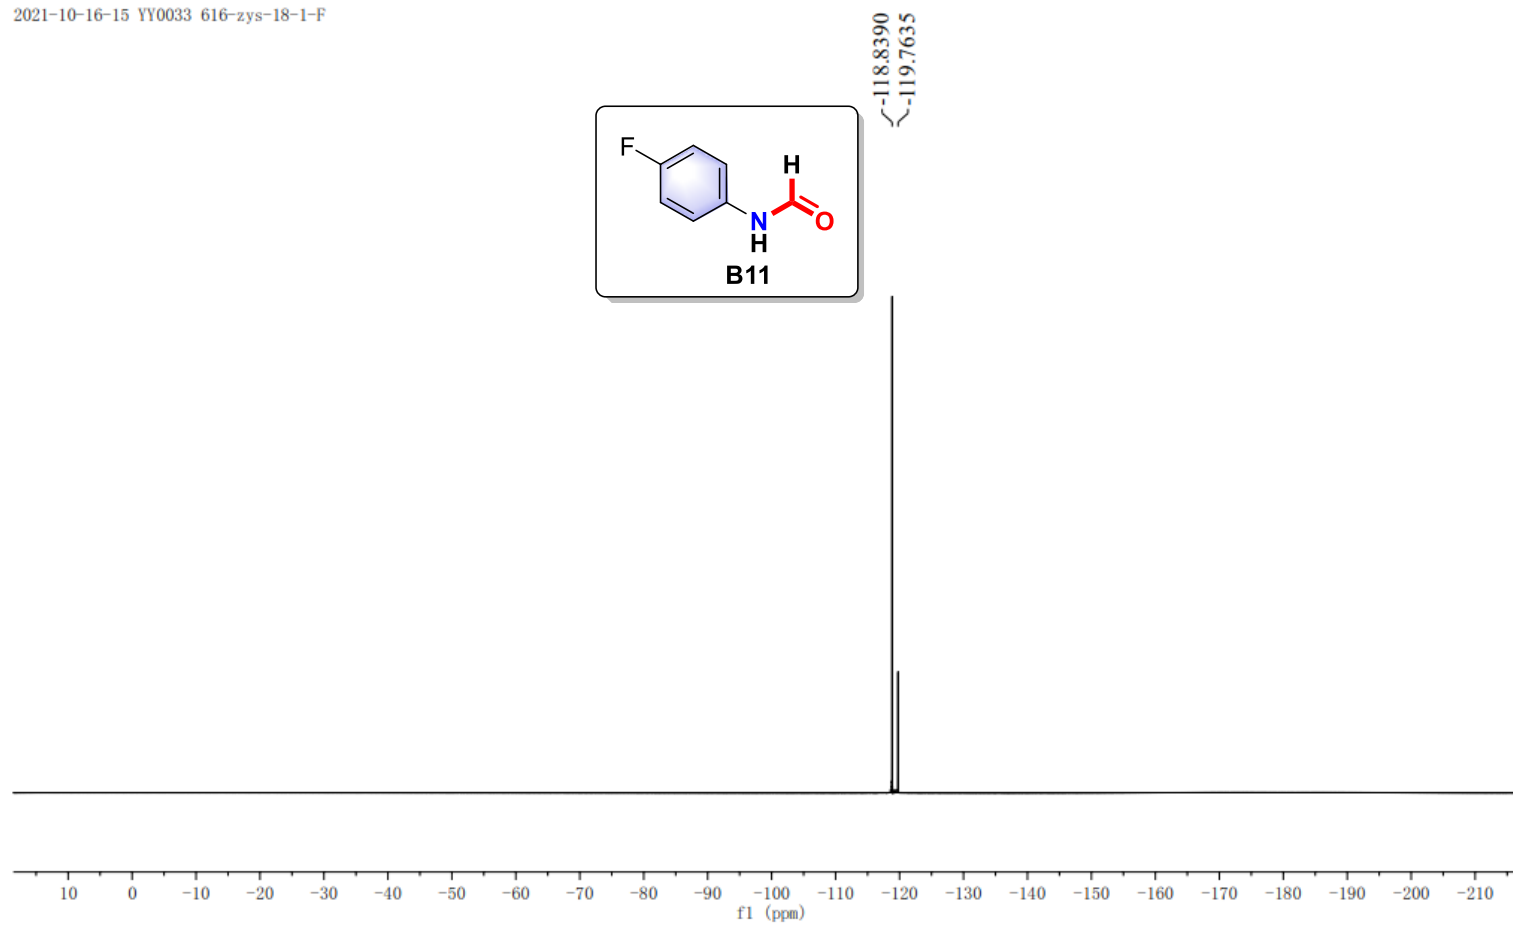

2021-10-12 YY0027 616-735-9-2.10.fid

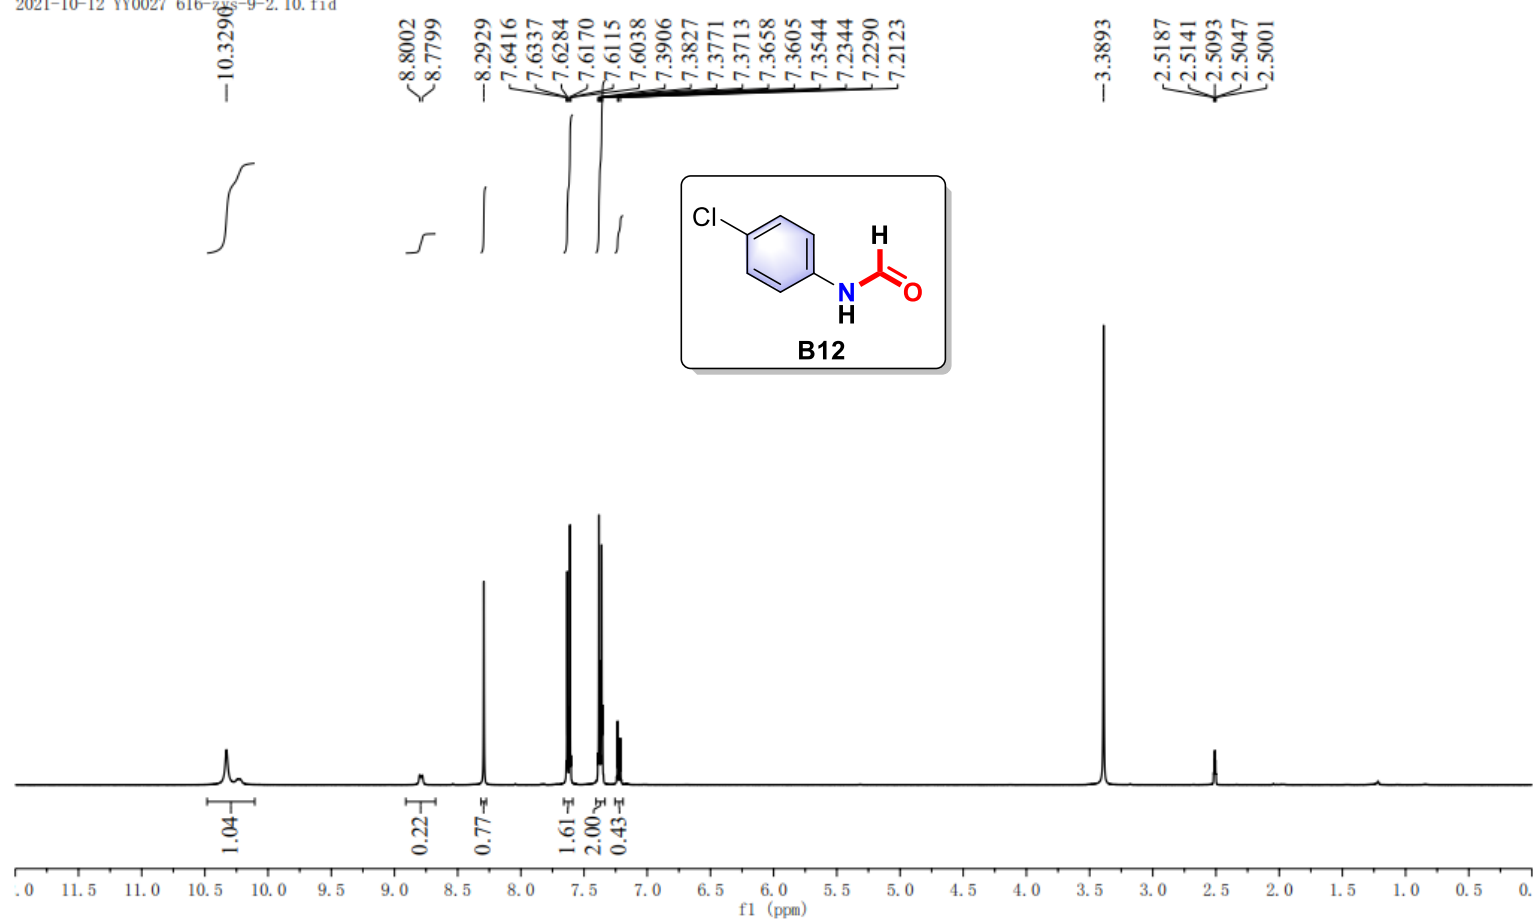

2021-10-12 YY0030 616-zys-9-2-10.fid

162.995  
160.182

137.86  
137.61  
129.69  
129.22  
127.93  
127.62  
121.17  
119.44

40.37  
40.17  
39.96  
39.75  
39.54

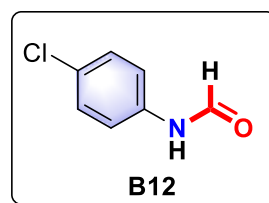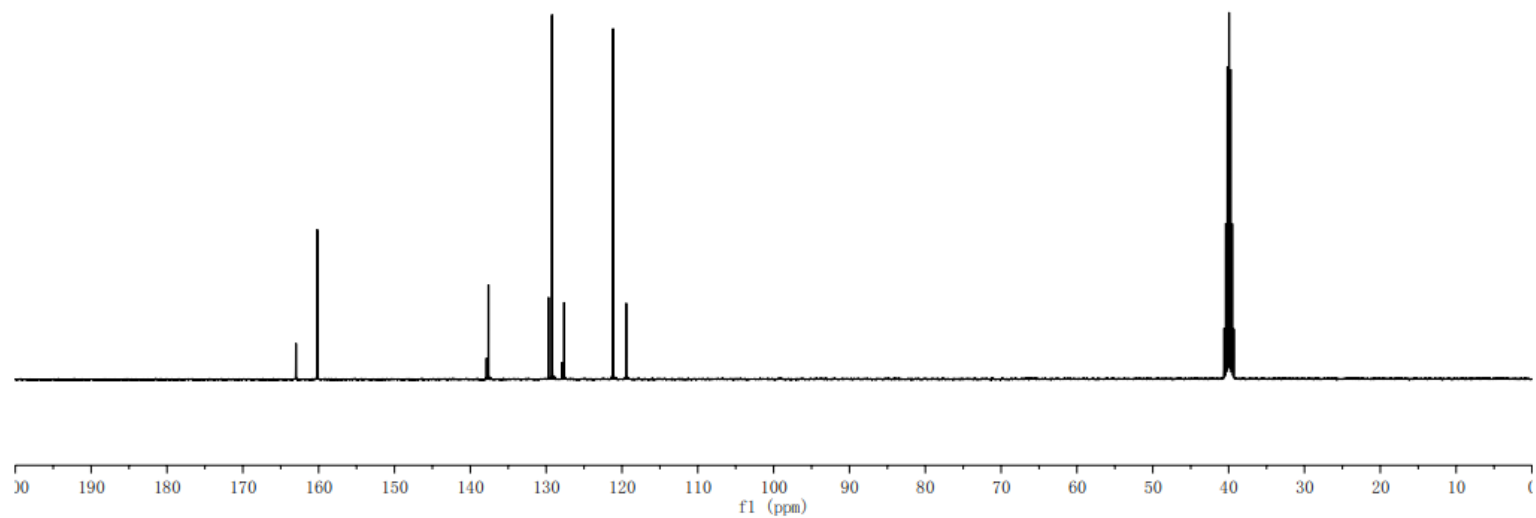

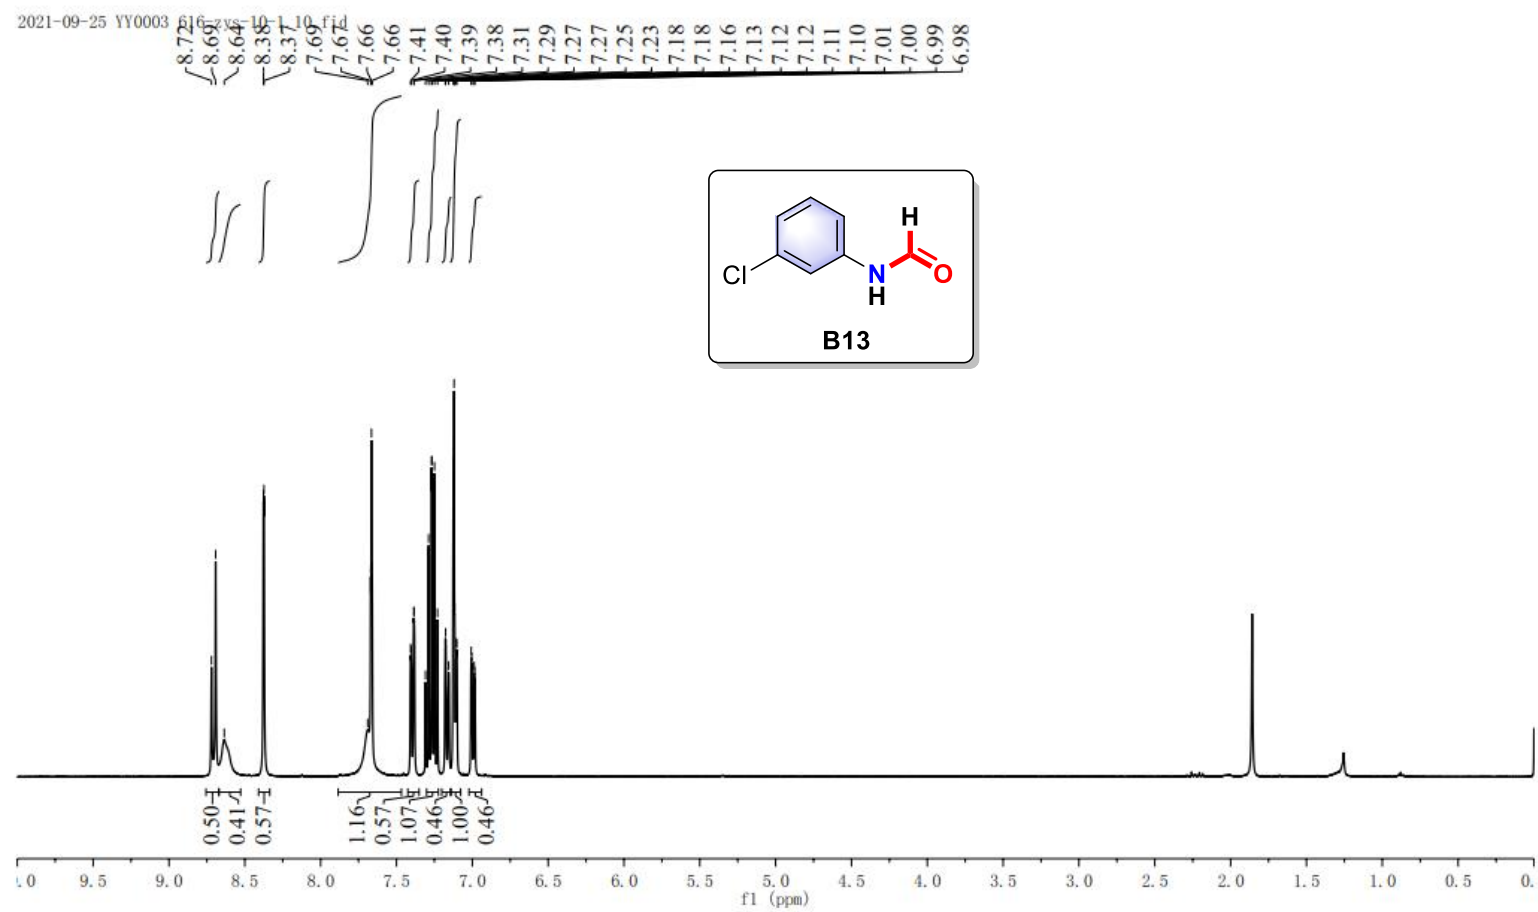

2021-09-29-yy0001-616-zys-10-1

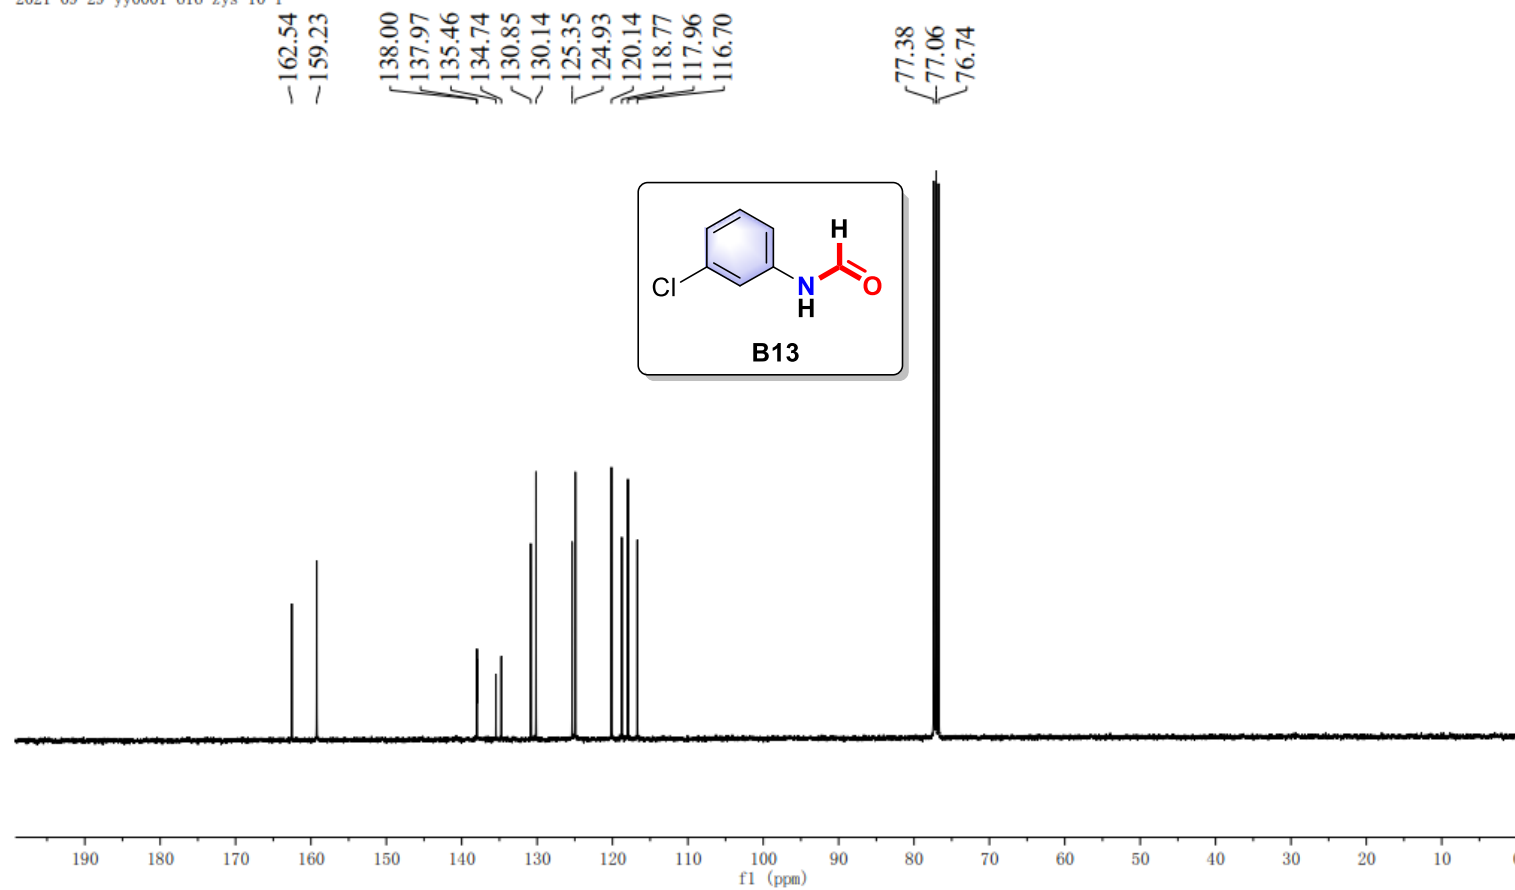

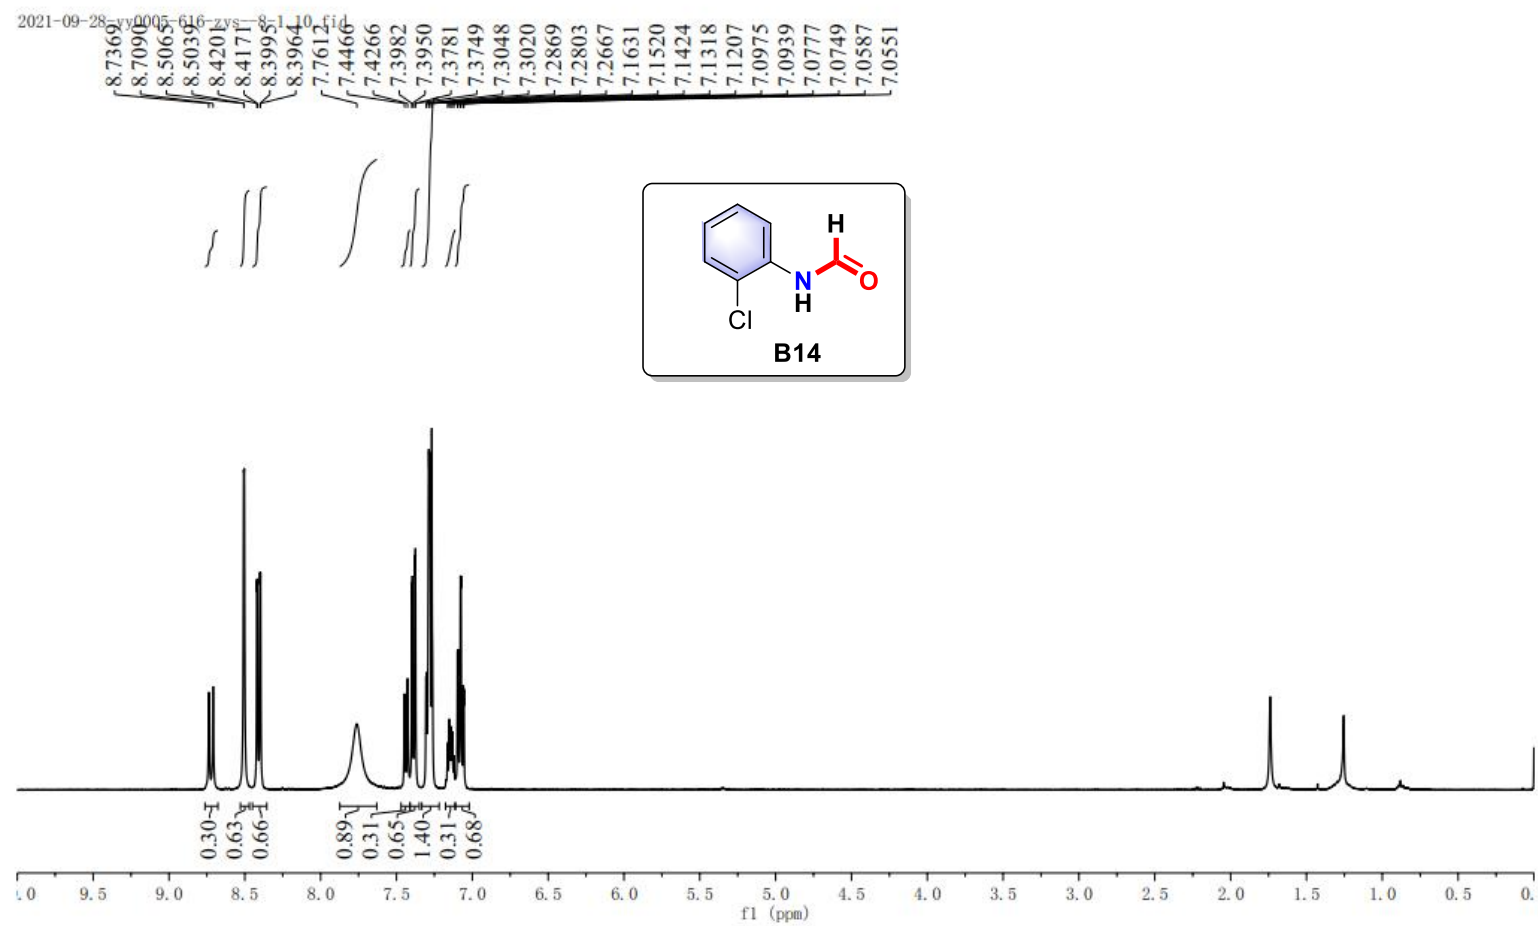

2021-10-08 YY0002 616-zys-8-1

161.55  
159.01  
158.93  
133.70  
130.32  
129.21  
129.13  
128.03  
127.89  
127.81  
125.96  
125.23  
125.15  
122.58  
122.09  
122.01  
118.78  
118.70  
77.38  
77.03  
76.74

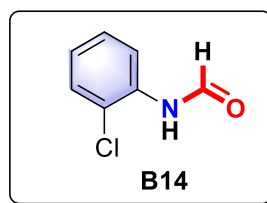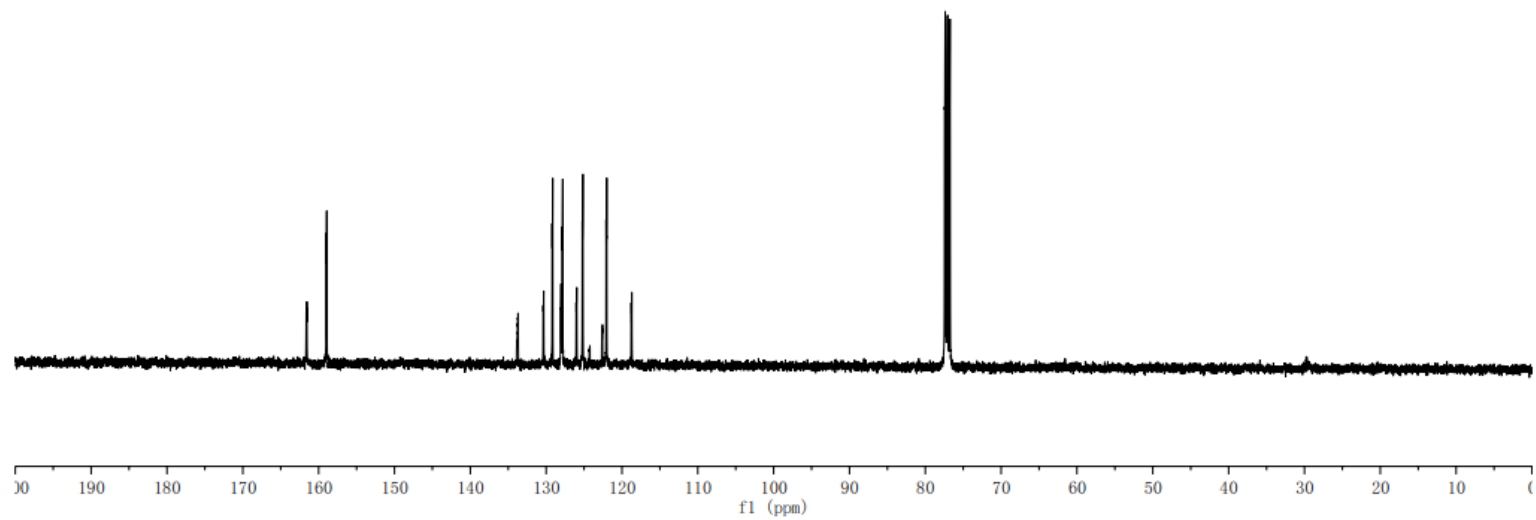

2021-09-27-yy0022-616-7ys-11-1\_10.fid

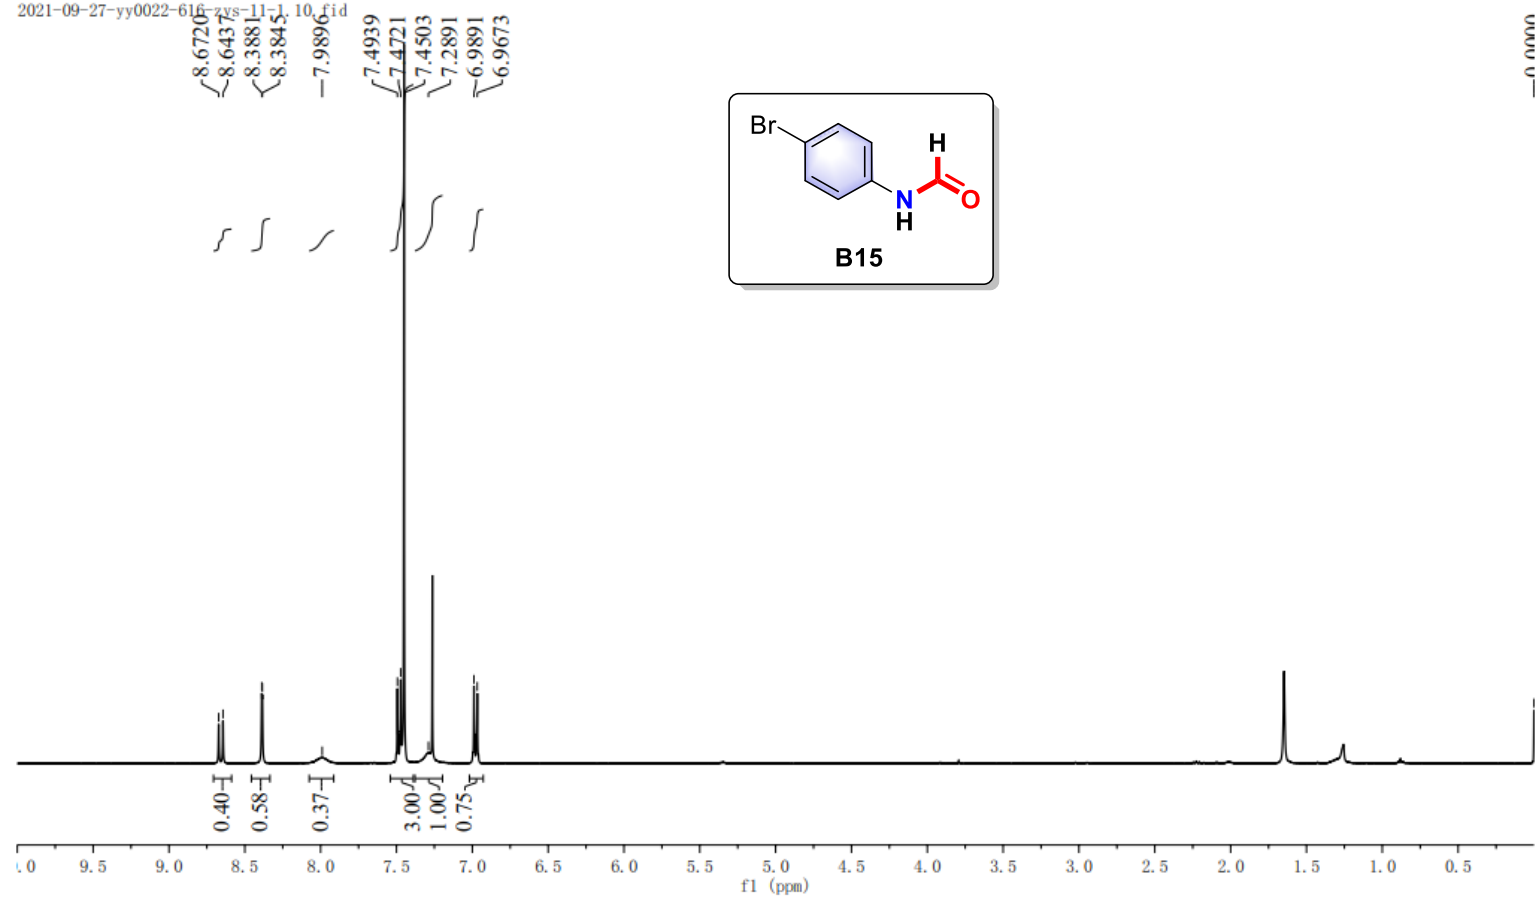

2021-09-29-yy0001-616-zys-11-1

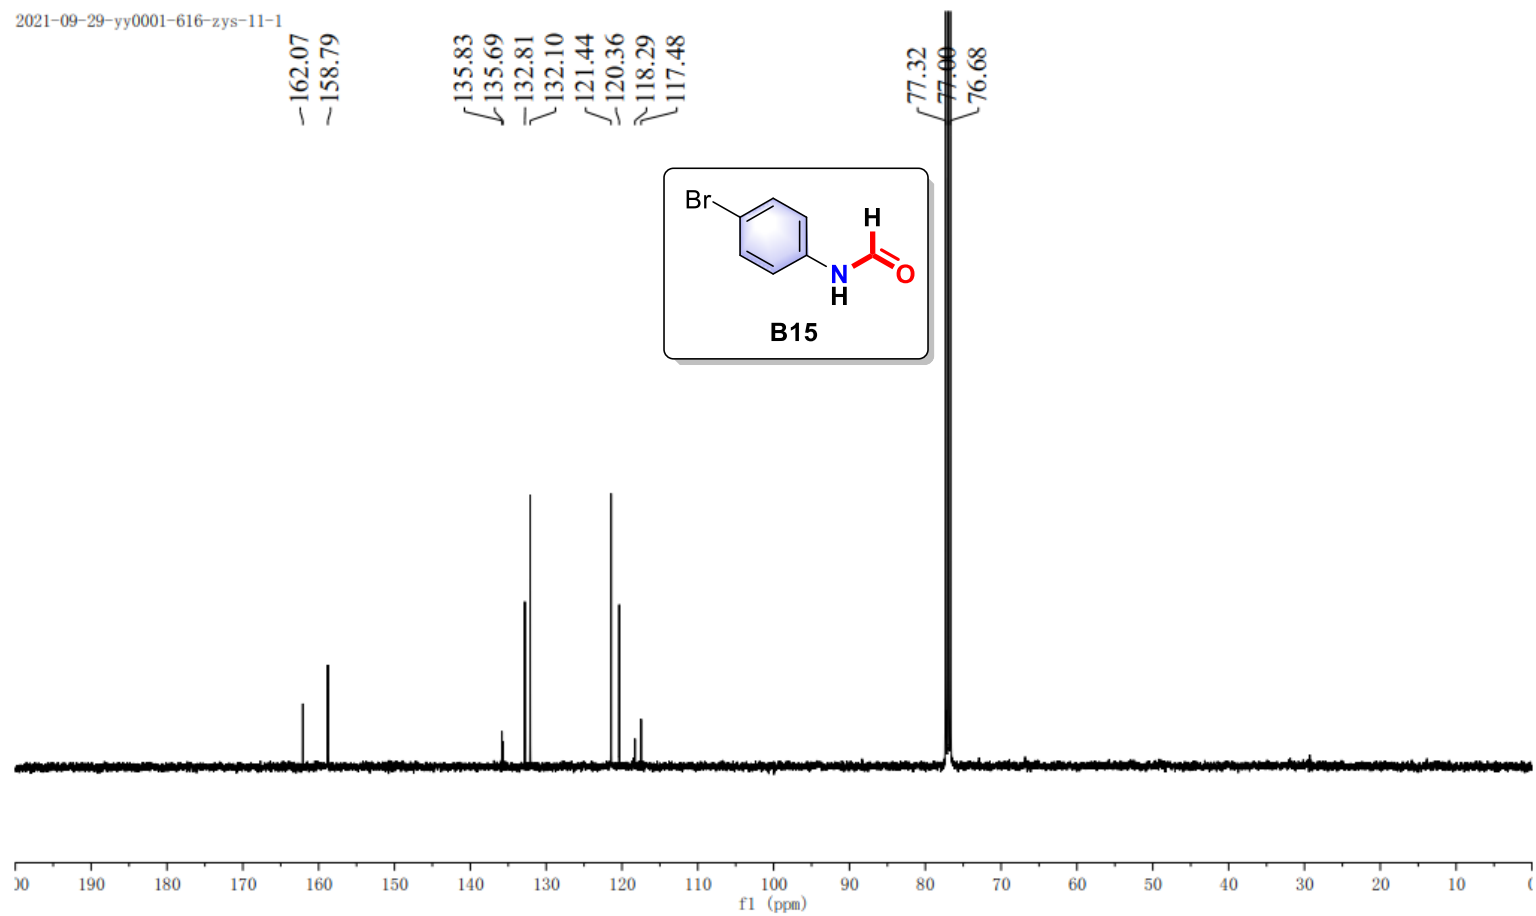

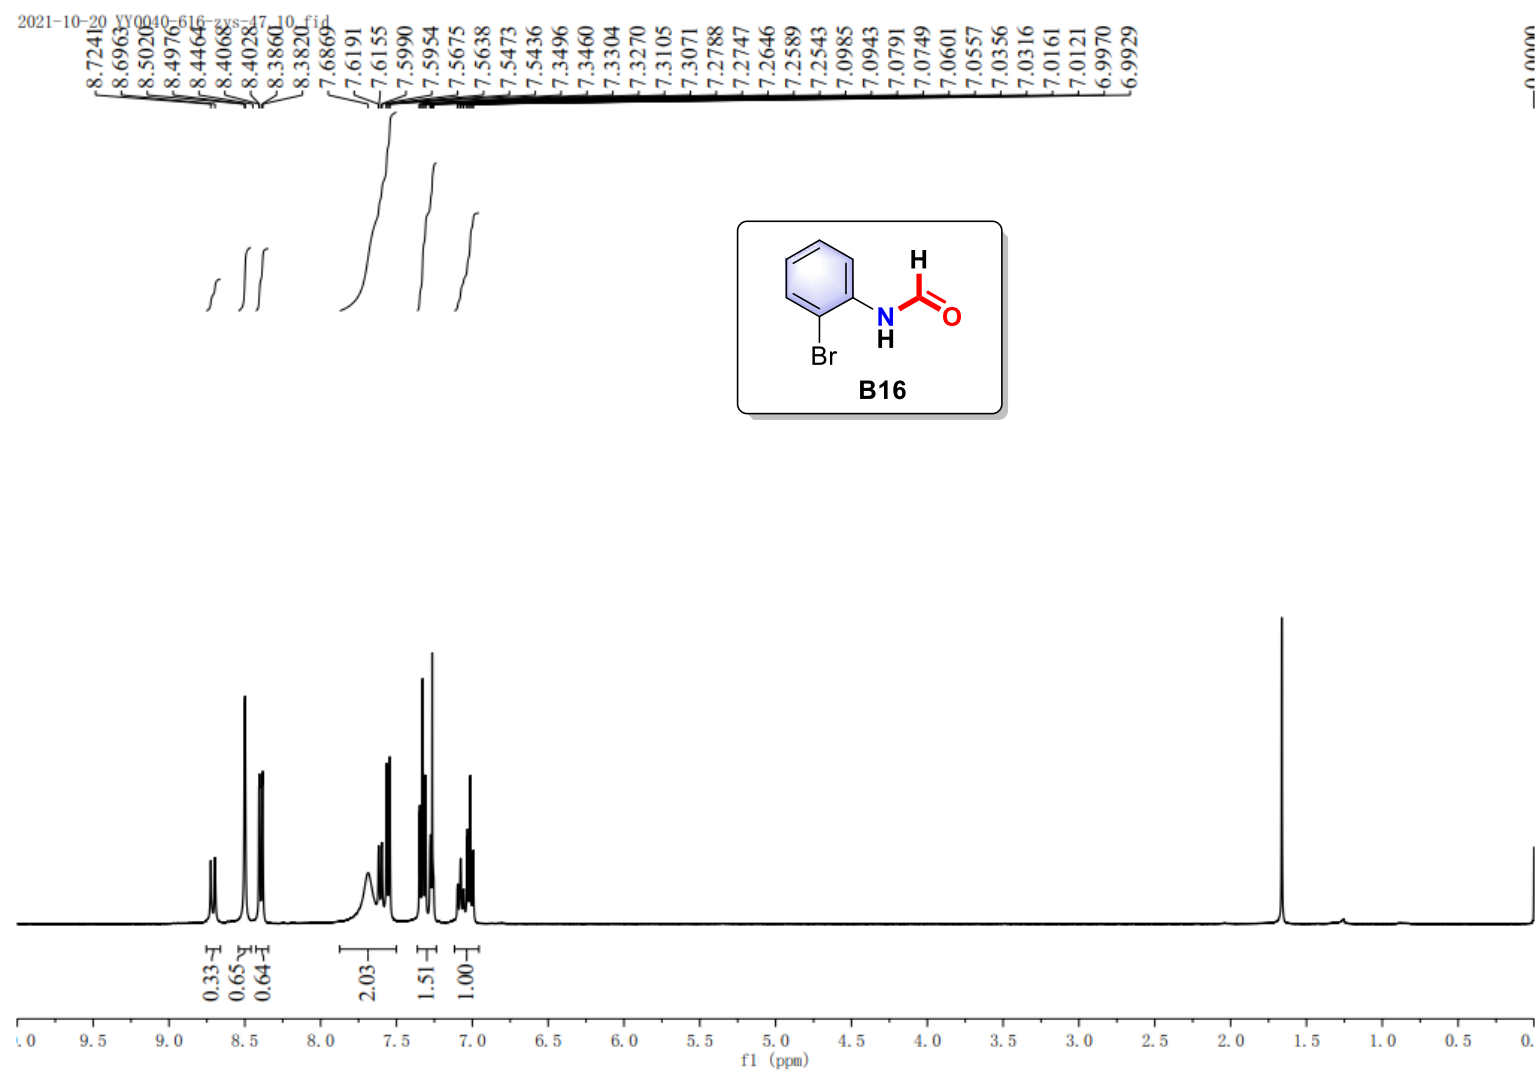

2021-10-27 YY0034-616-ZYS-47.10.fid

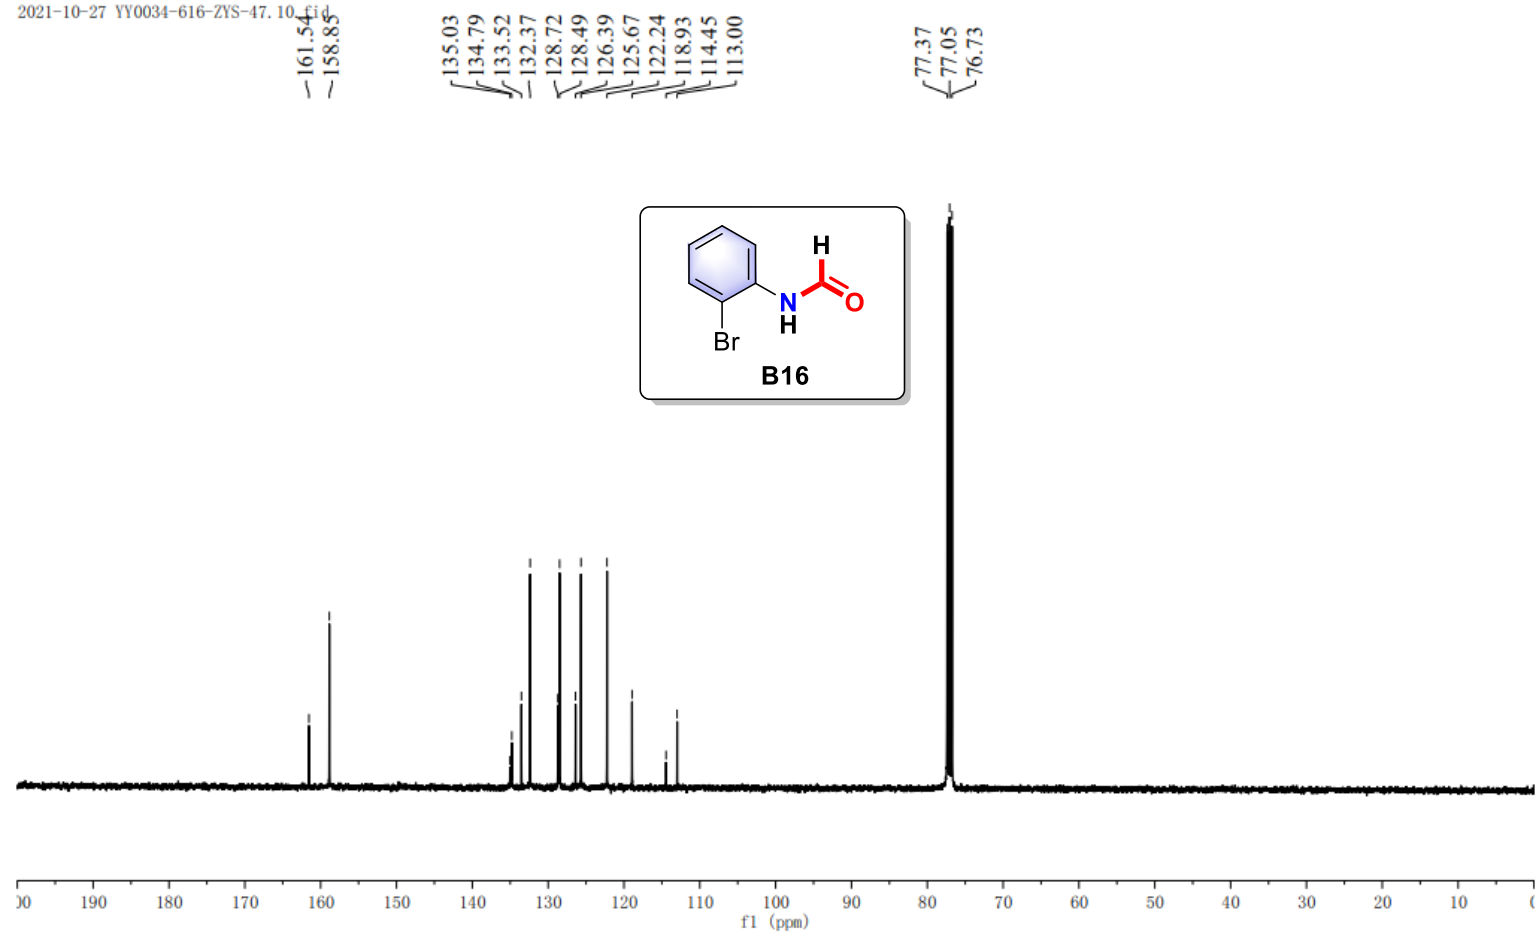

2021-09-24-yy0003-616-zy-15-10.fid

8.6859  
8.6577  
8.3899  
8.3857  
8.2026  
8.1747  
7.6471  
7.6259  
7.3414  
7.3198  
6.8796  
6.8734  
6.8575  
6.8524

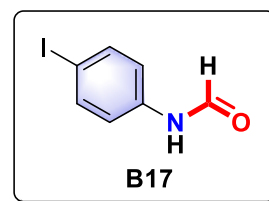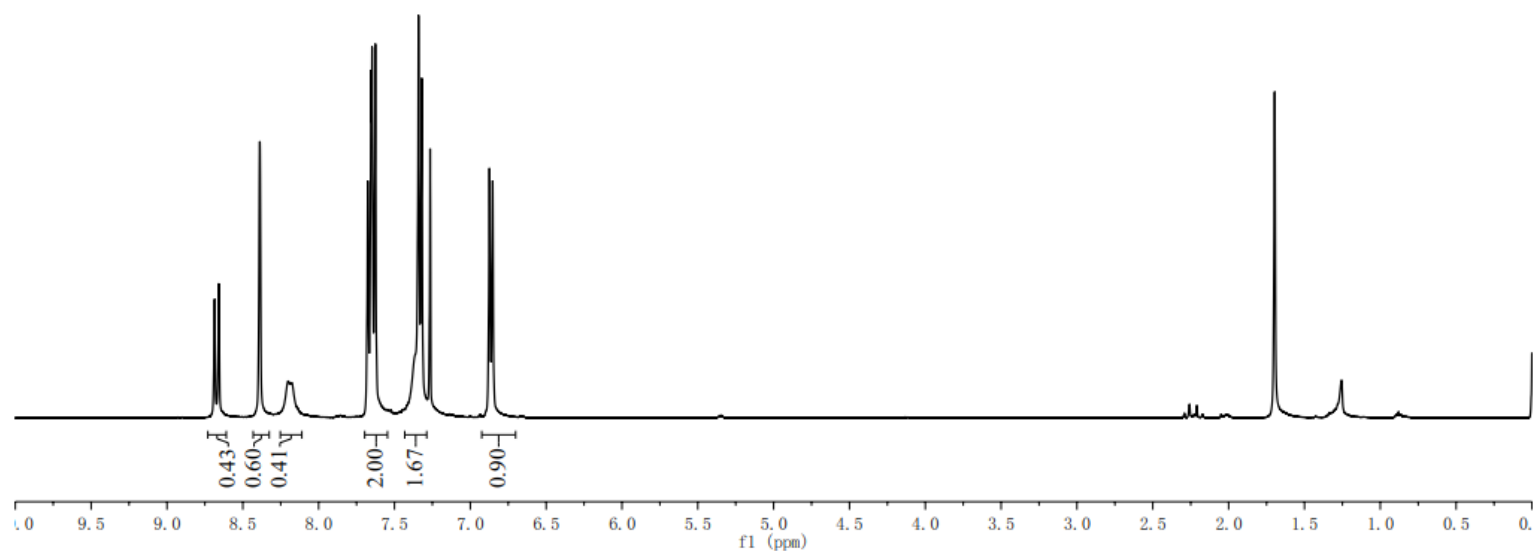

2021-09-25 YY0003 616-zys-15.10.f1

162.13  
158.90

138.74  
138.07  
136.56  
136.46

121.75  
120.51

88.71  
88.16

77.36  
77.04  
76.72

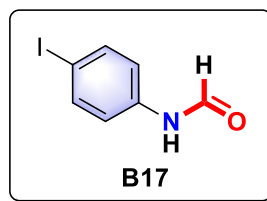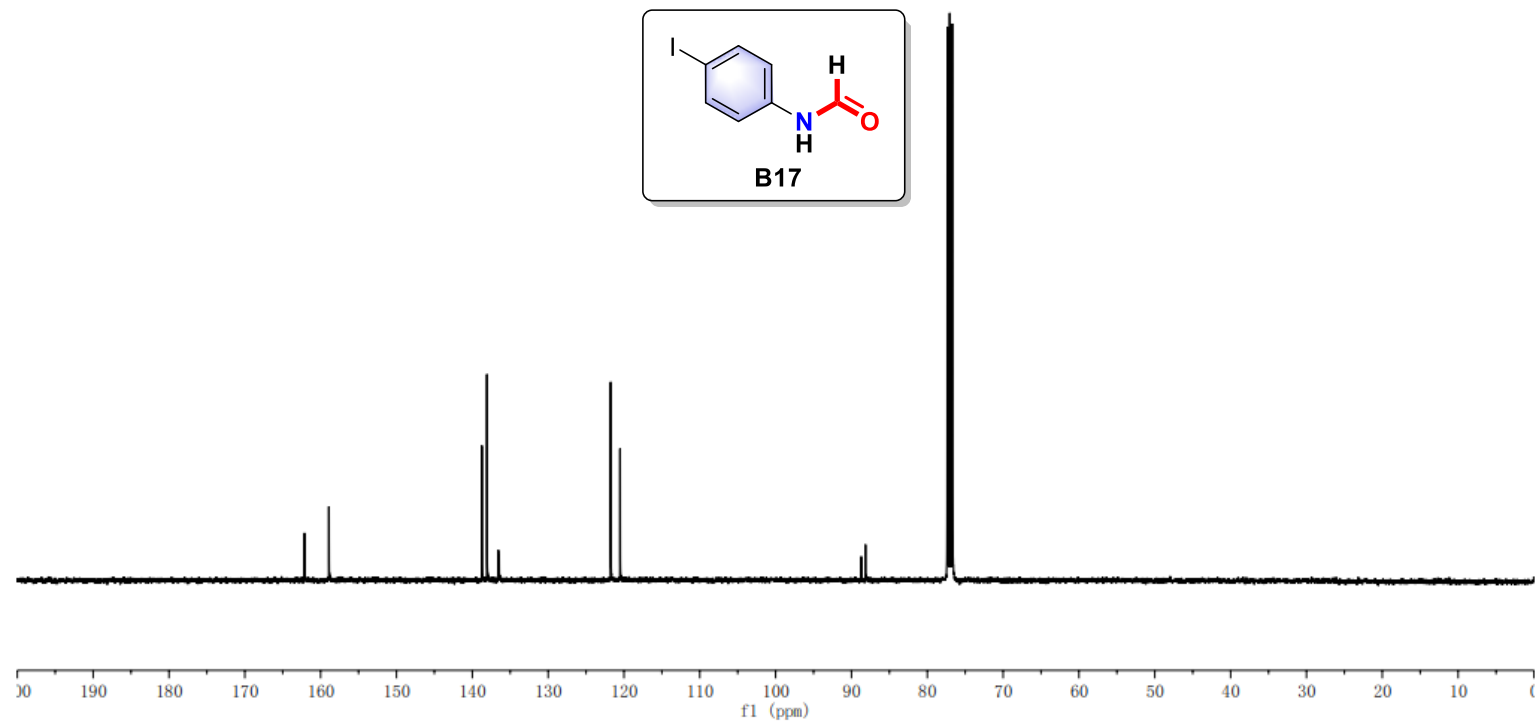

2021-10-09 YY0013 616-zys-36\_10.fid

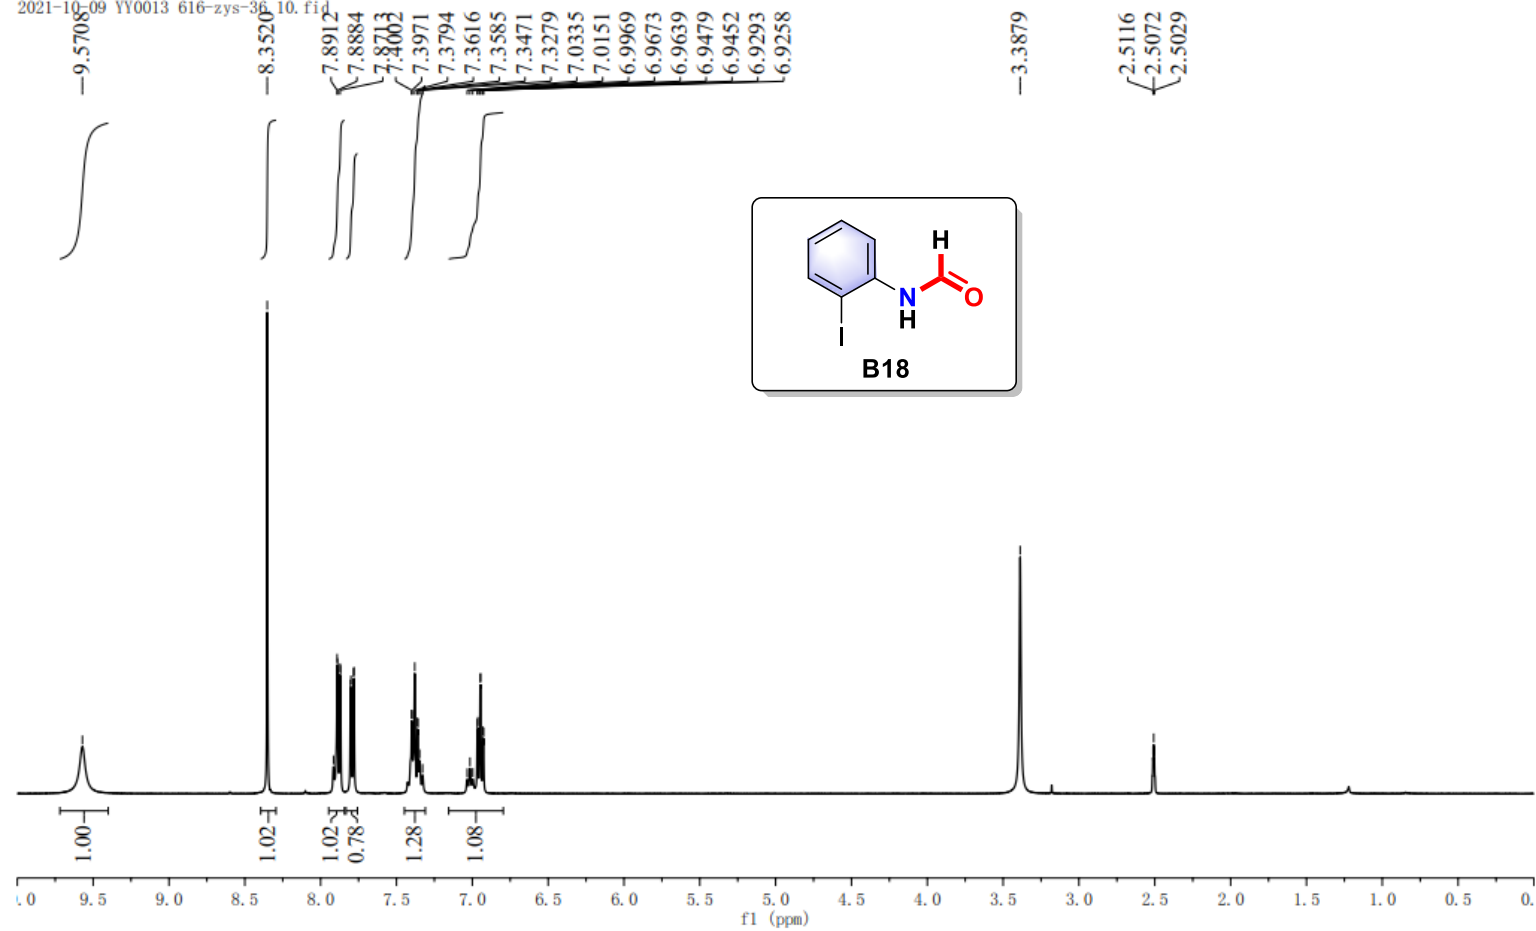

2021-10-12 YY0039 616-zys-36.10.fid

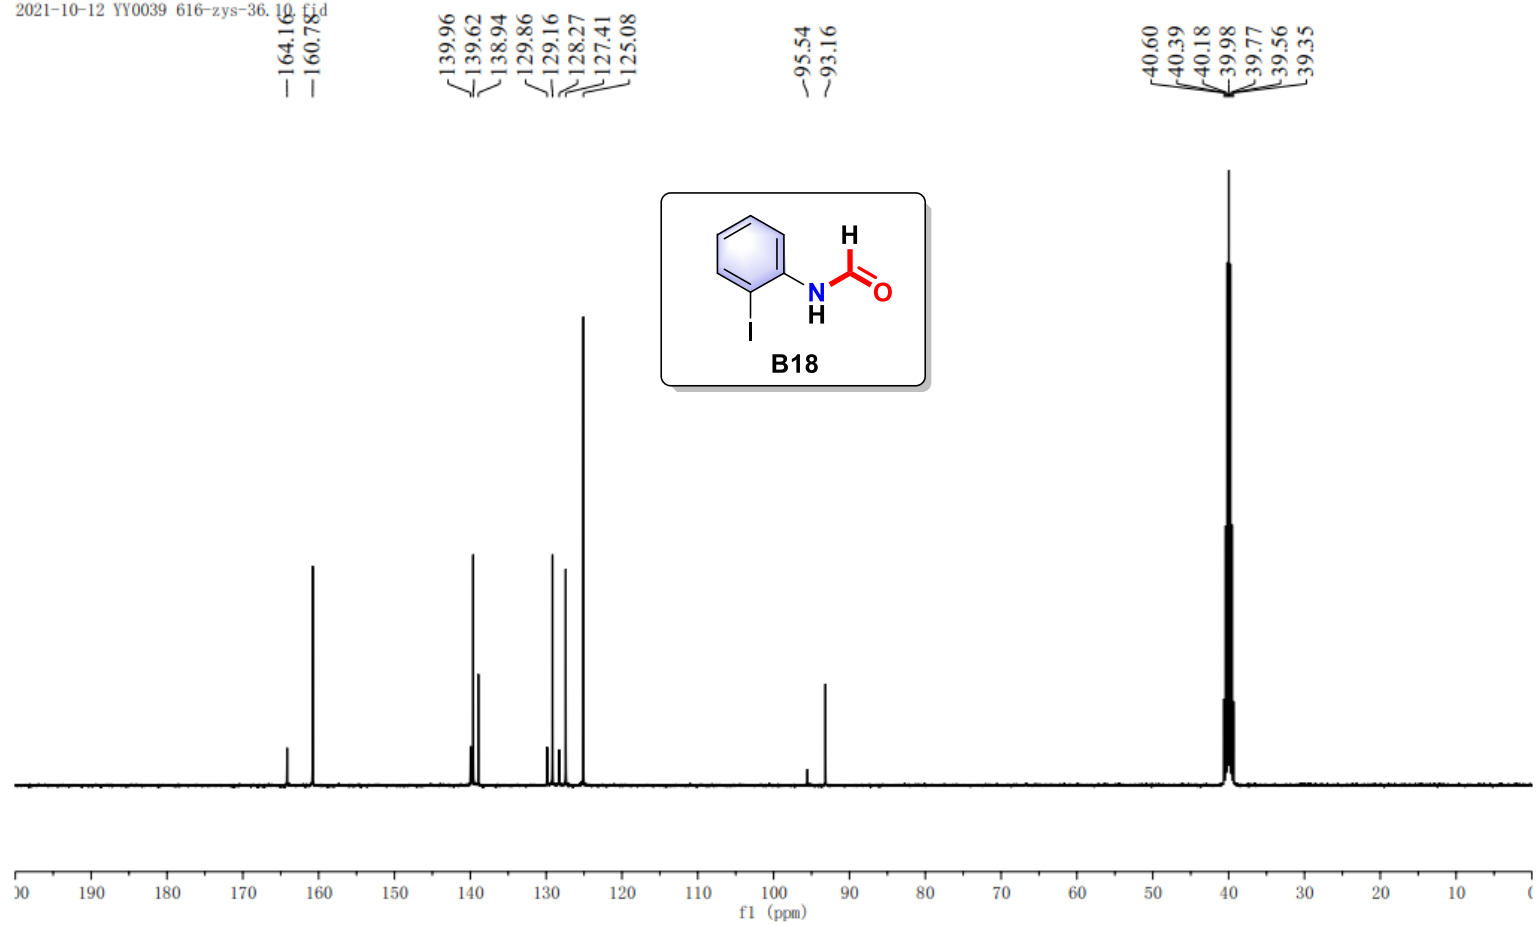

2021-10-15-14 YY002861628-43

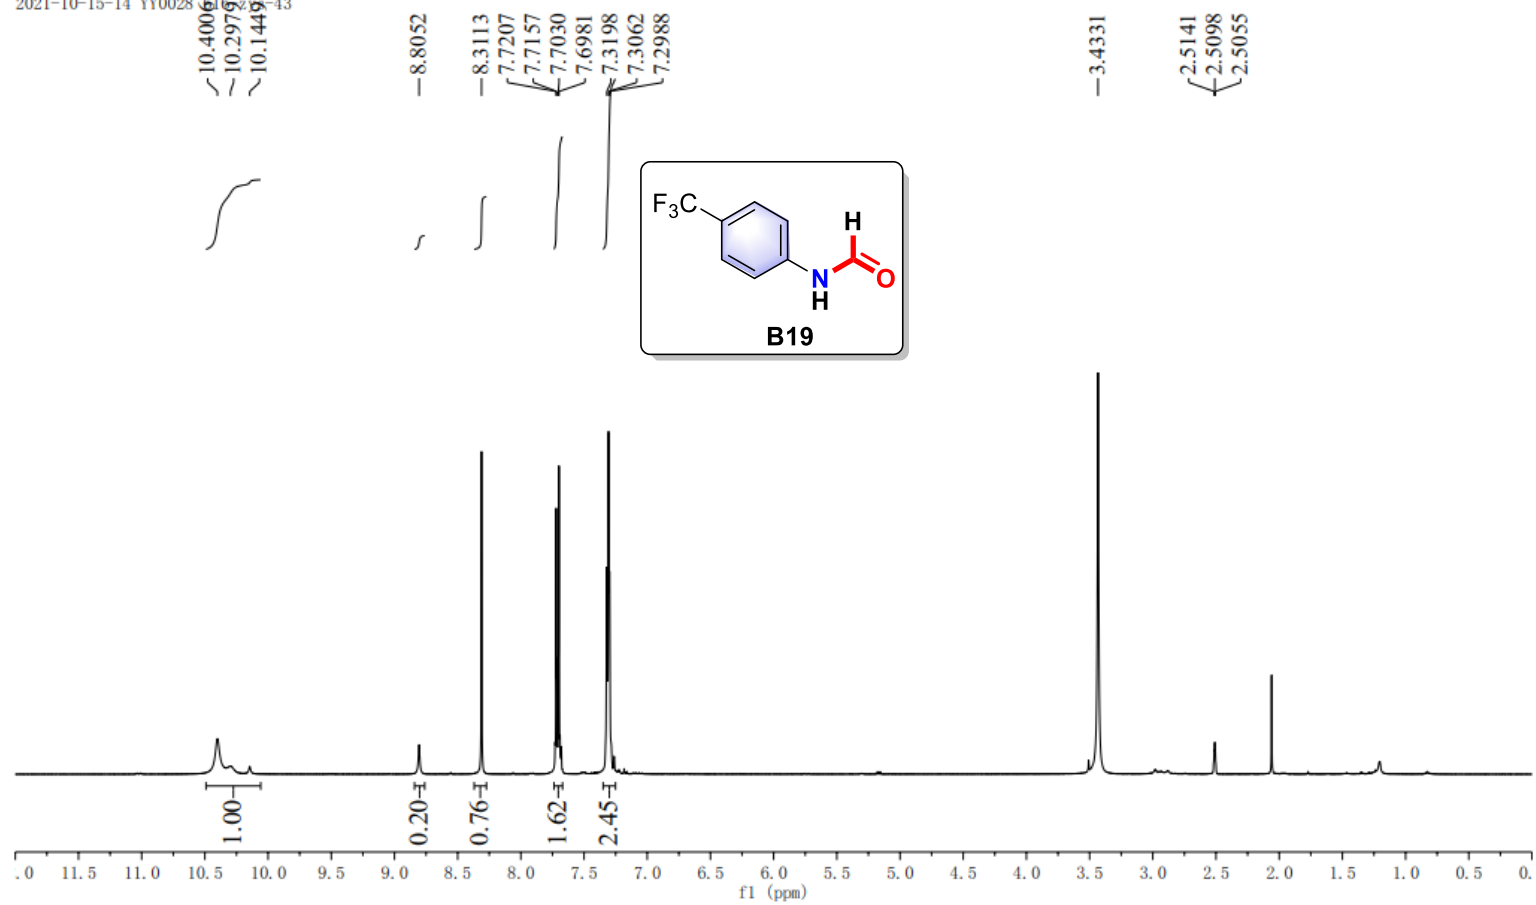

2021-10-24 YY0021-616-ZYS-43.fid

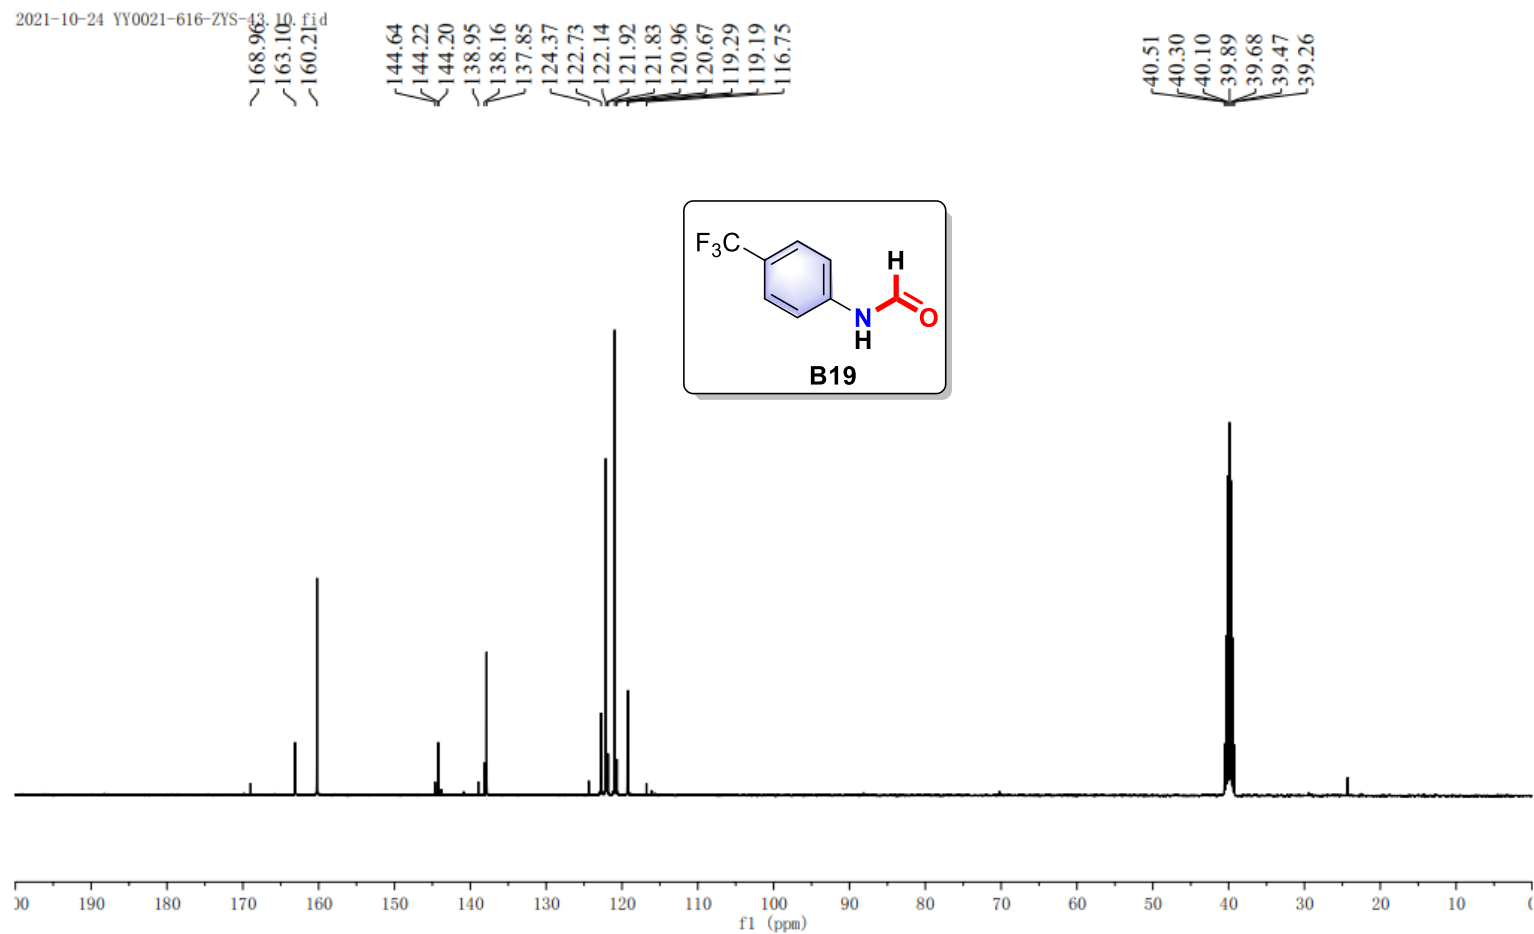

2021-10-23 YY0003-616-ZYS-43. 10. fid

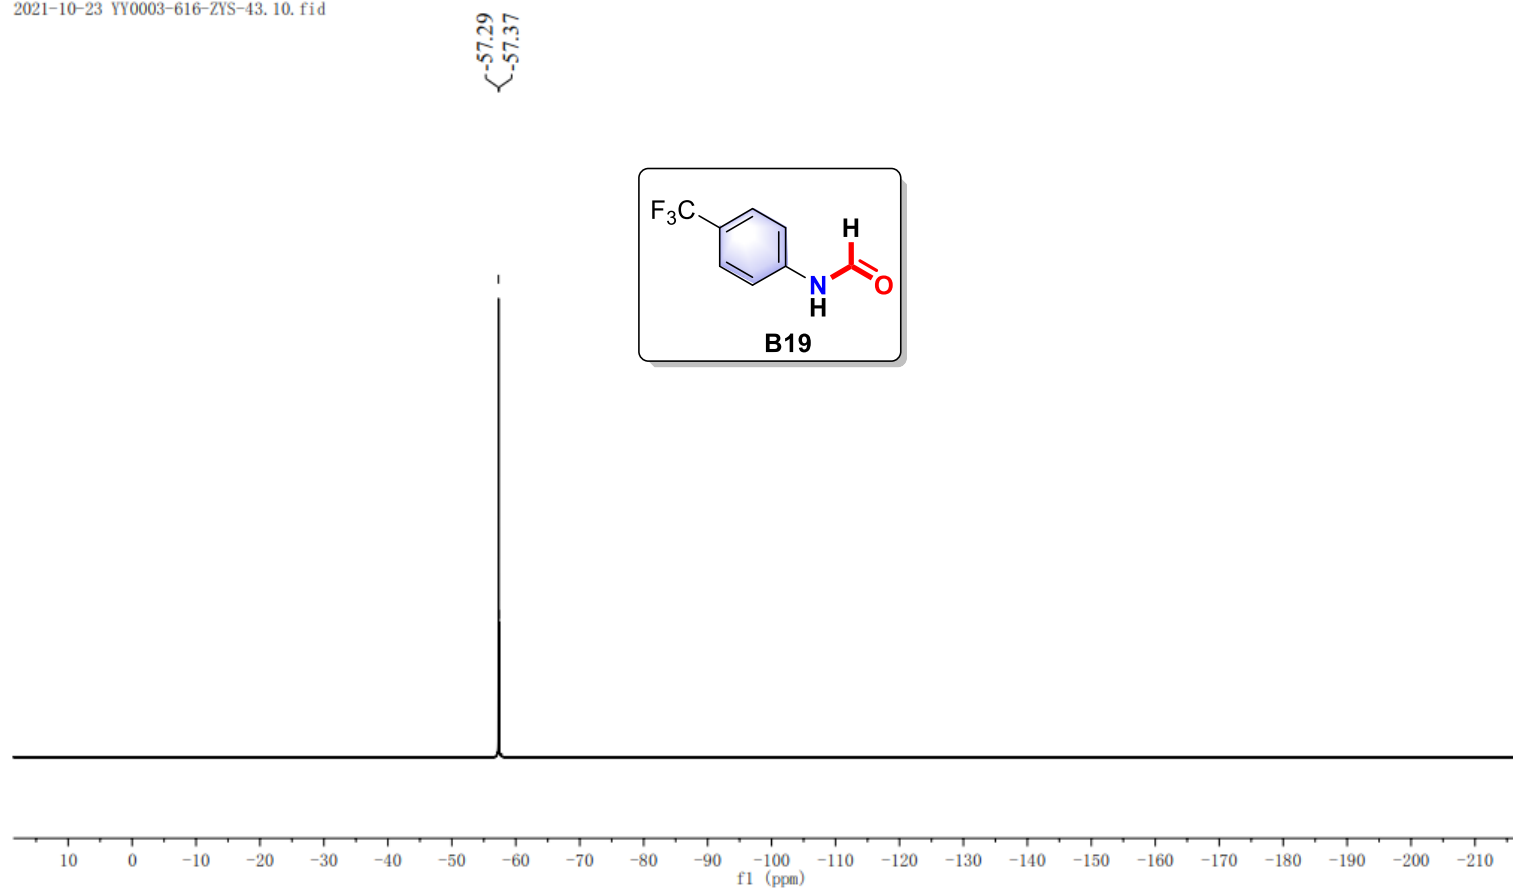

2021-10-09 YY0013 616-zys-33.10.fid

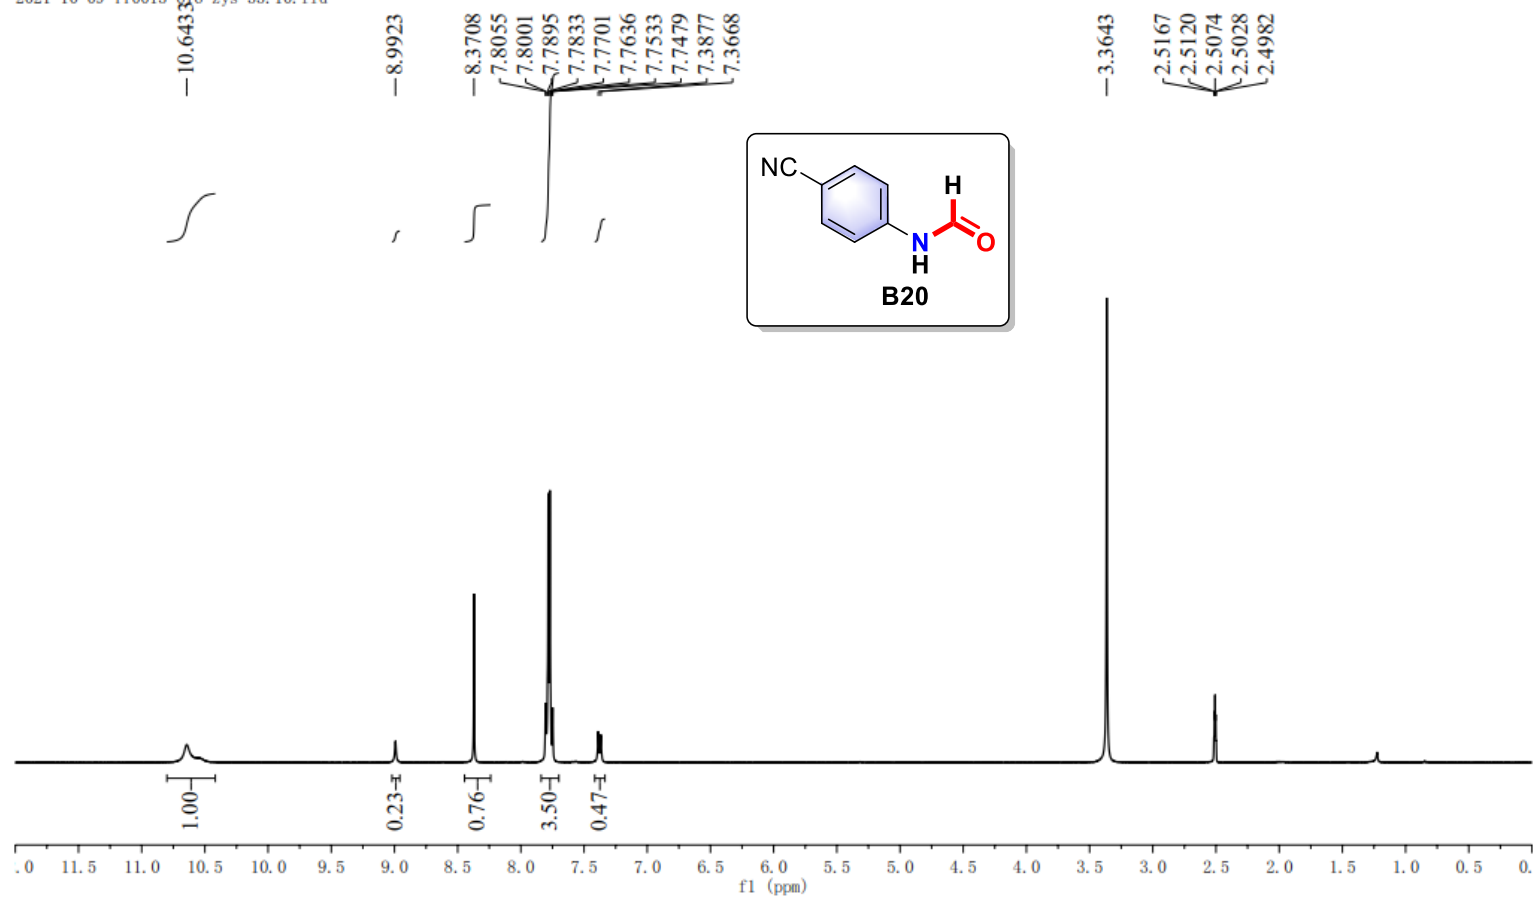

2021-10-12 YY0039 616-zys-33.10.f1

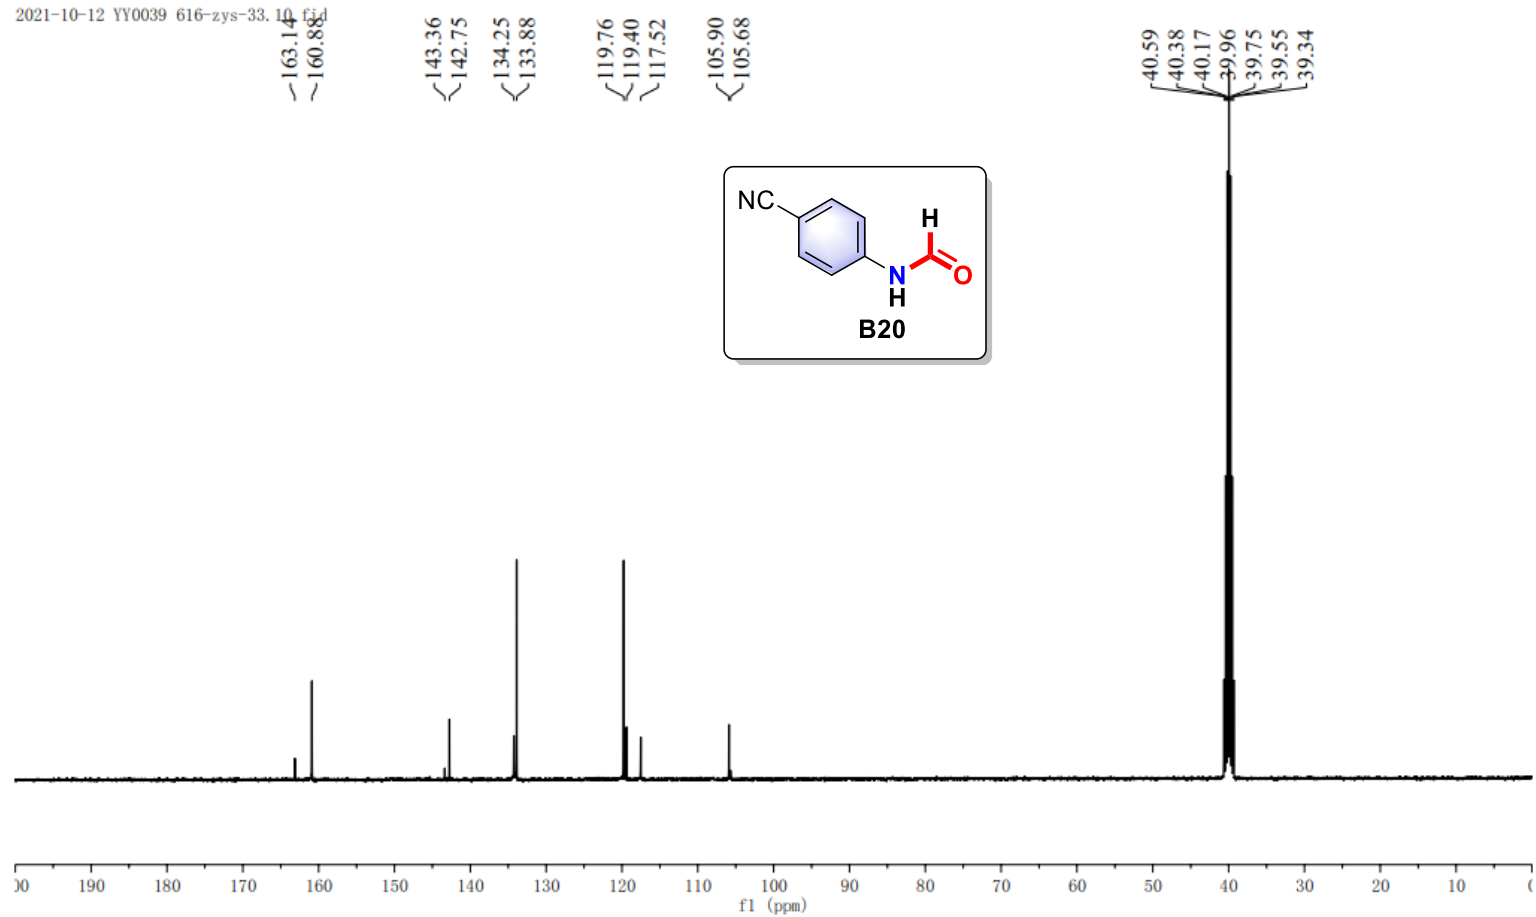

2021-10-15-14 YY0028 616-zys-42. 10. fid

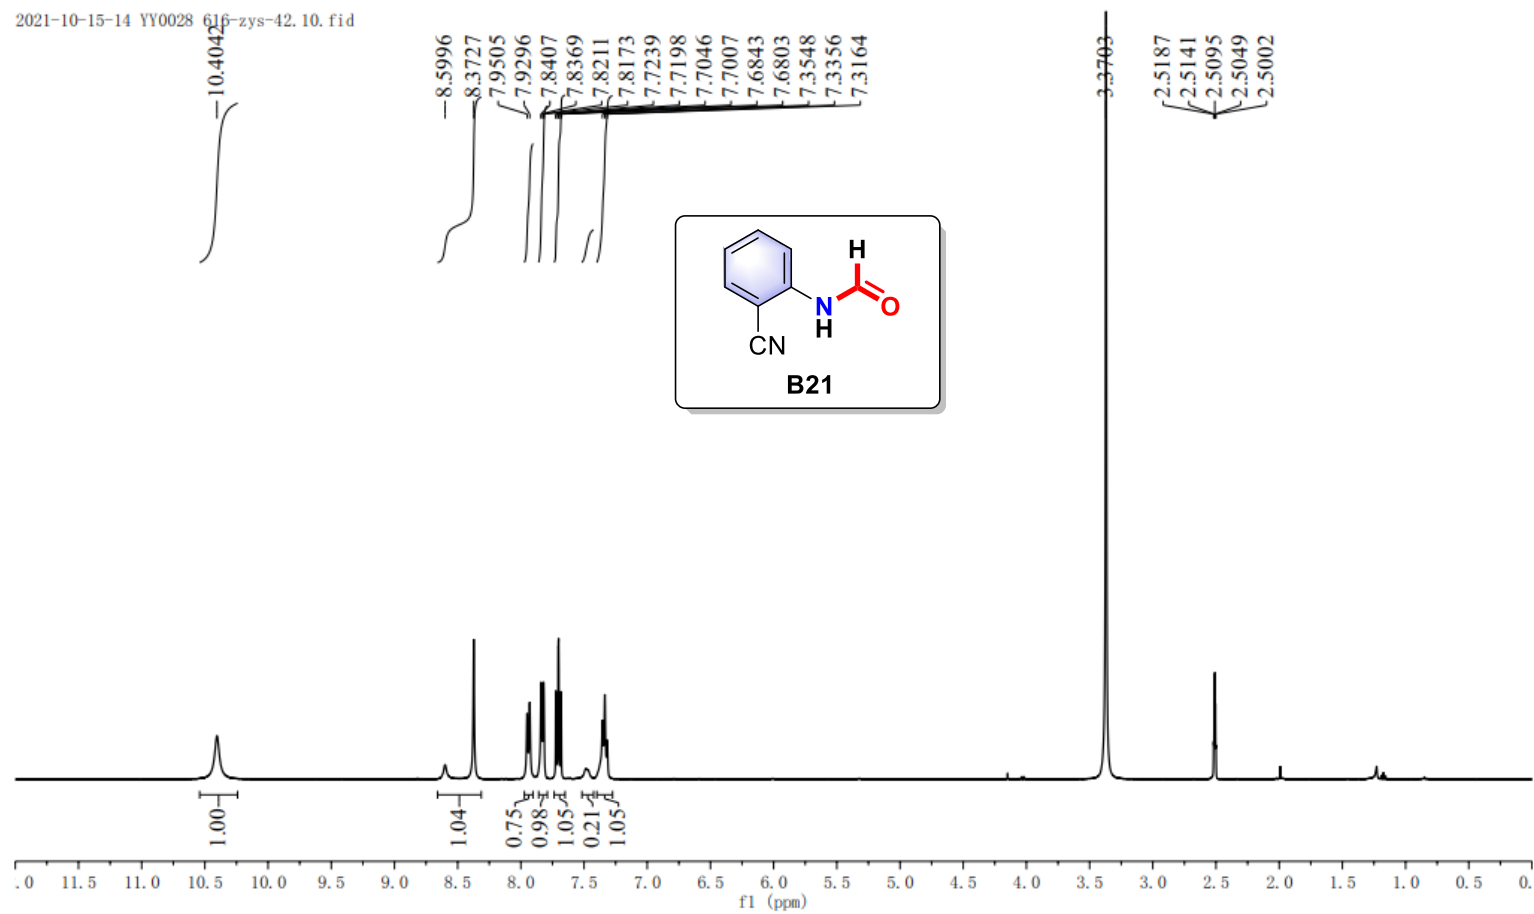

2021-10-27 YY0034-616-ZYS-47

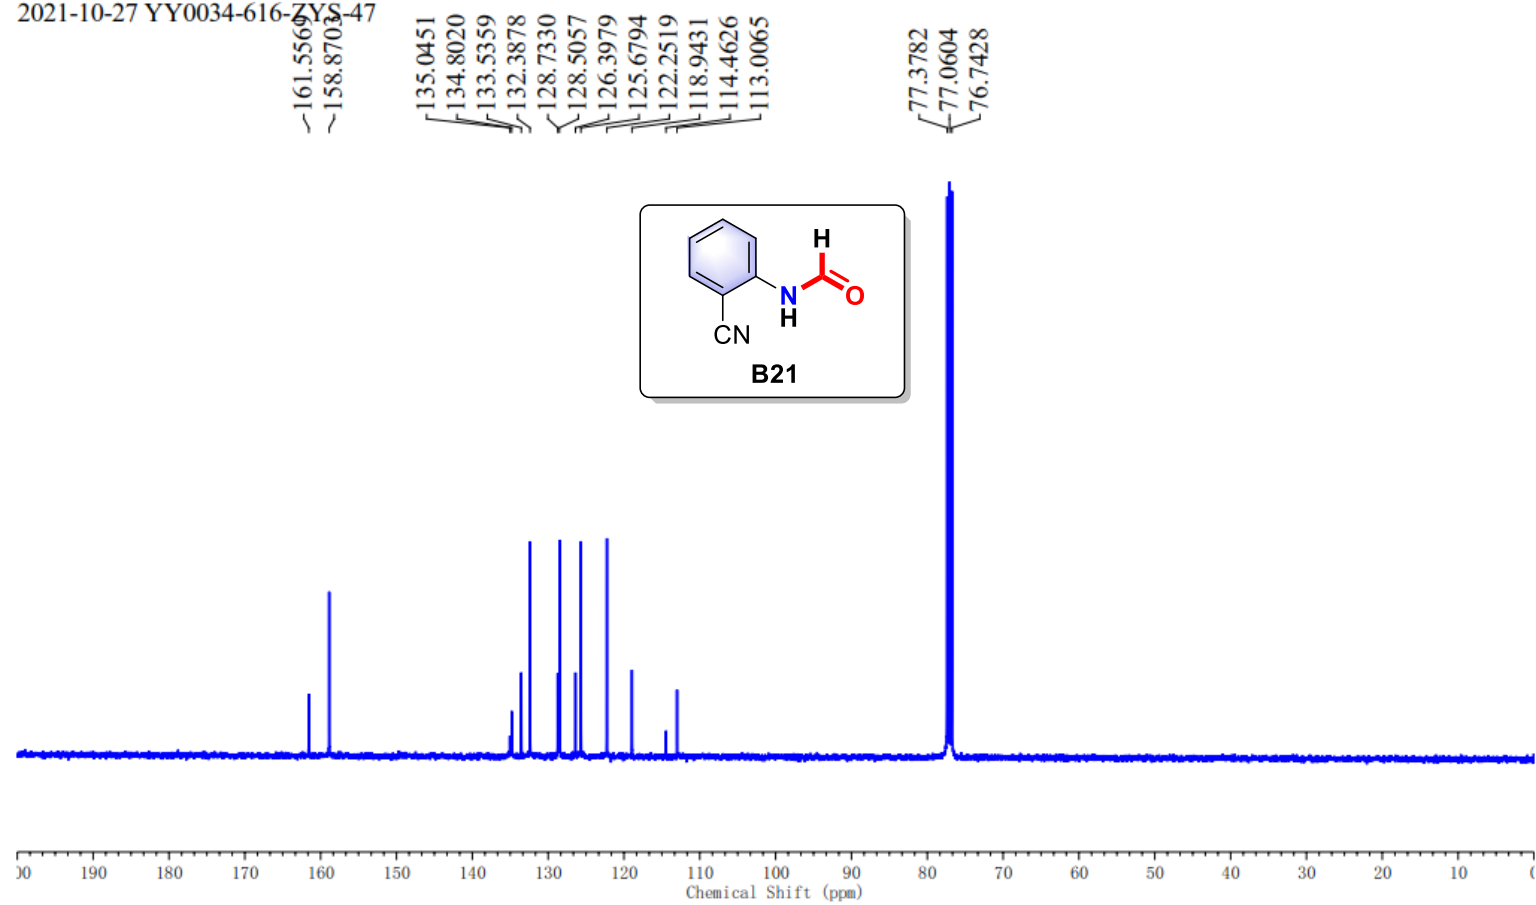

2021-10-16-15 YY0033 616-zyz

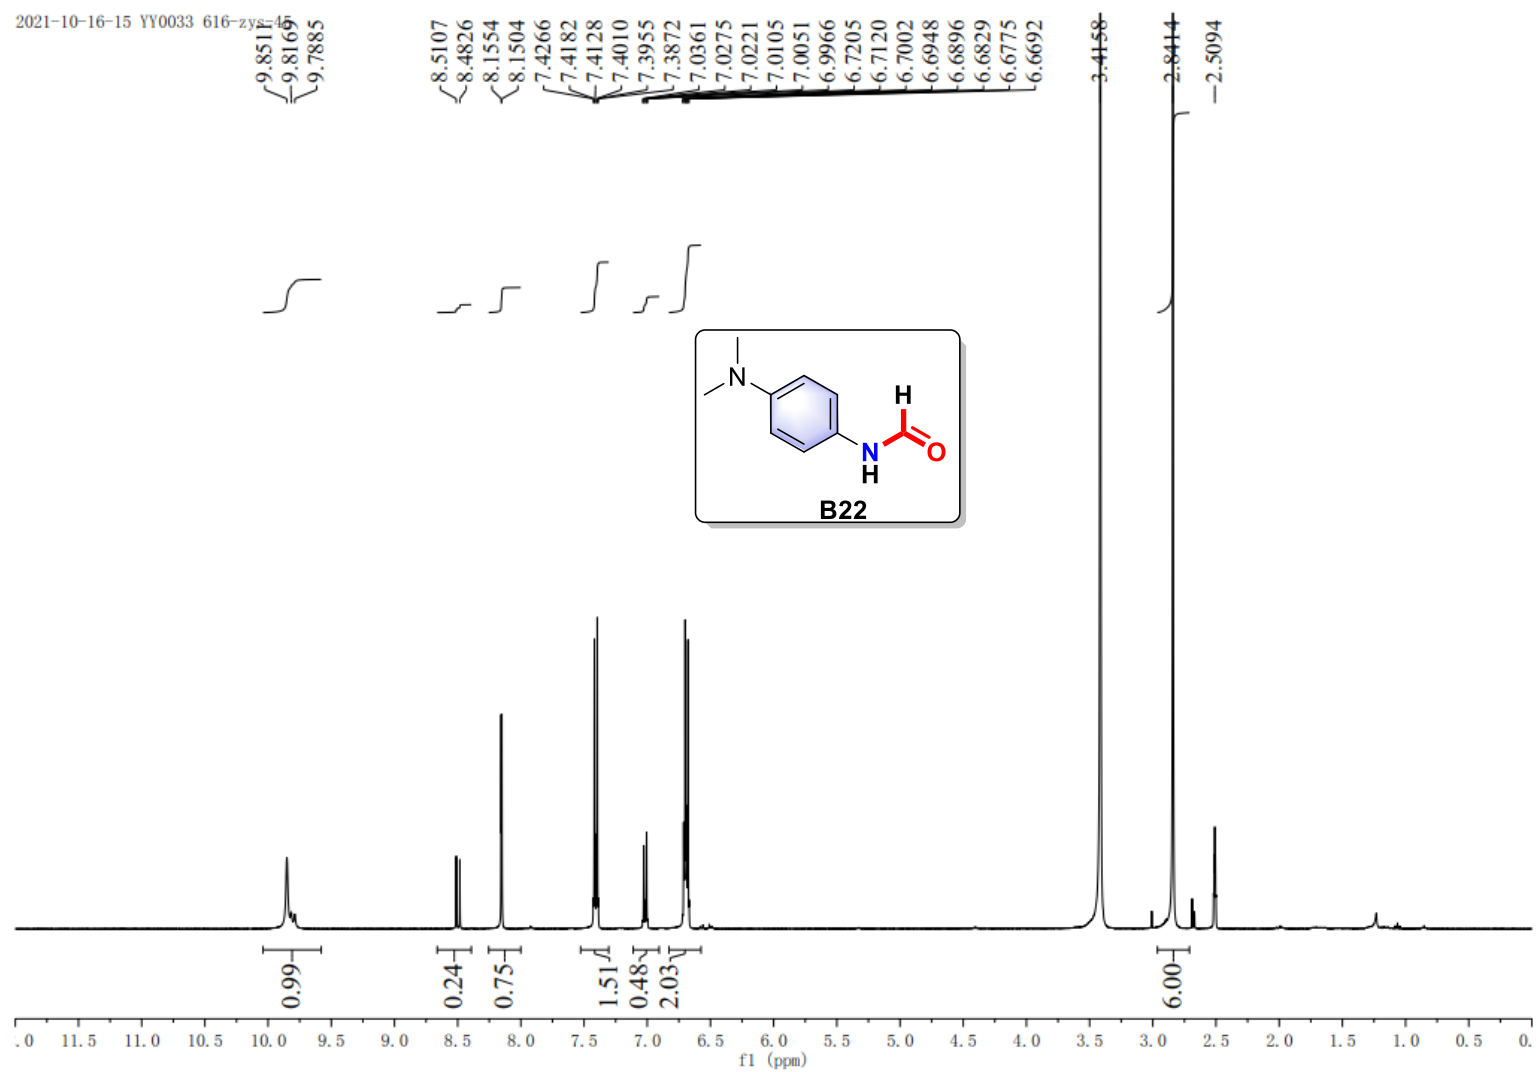

2021-10-24 YY0021-616-ZYS-45

162.9594  
159.1627  
148.3125  
147.7036

128.5540  
128.0585  
120.9201  
120.4828  
113.7980  
113.1328

40.9500  
40.9049  
40.5548  
40.3462  
40.1373  
39.9286  
39.7198  
39.5110  
39.3025

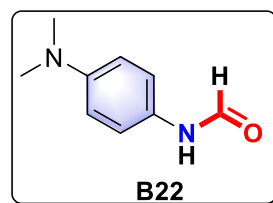

2021-10-24 YY0021-616-ZYS-45

40.9500  
40.9049  
40.5548  
40.3462  
40.1373  
39.9286  
39.7198  
39.5110  
39.3025

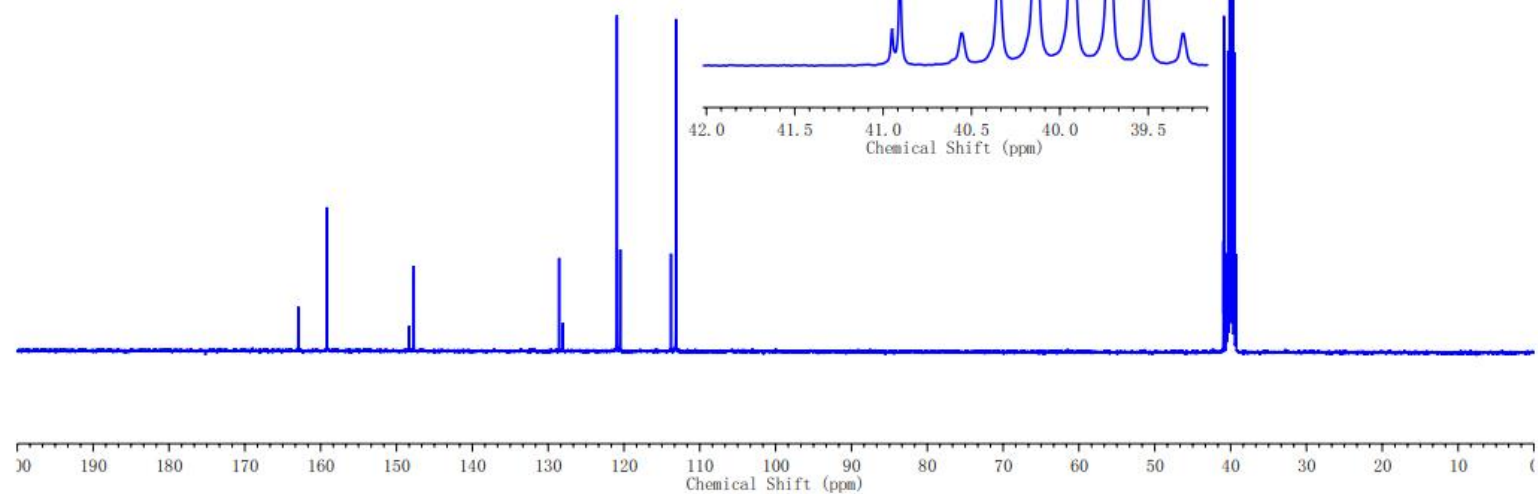

2021-10-21 YY0022-616-ZYS-48 10.fid

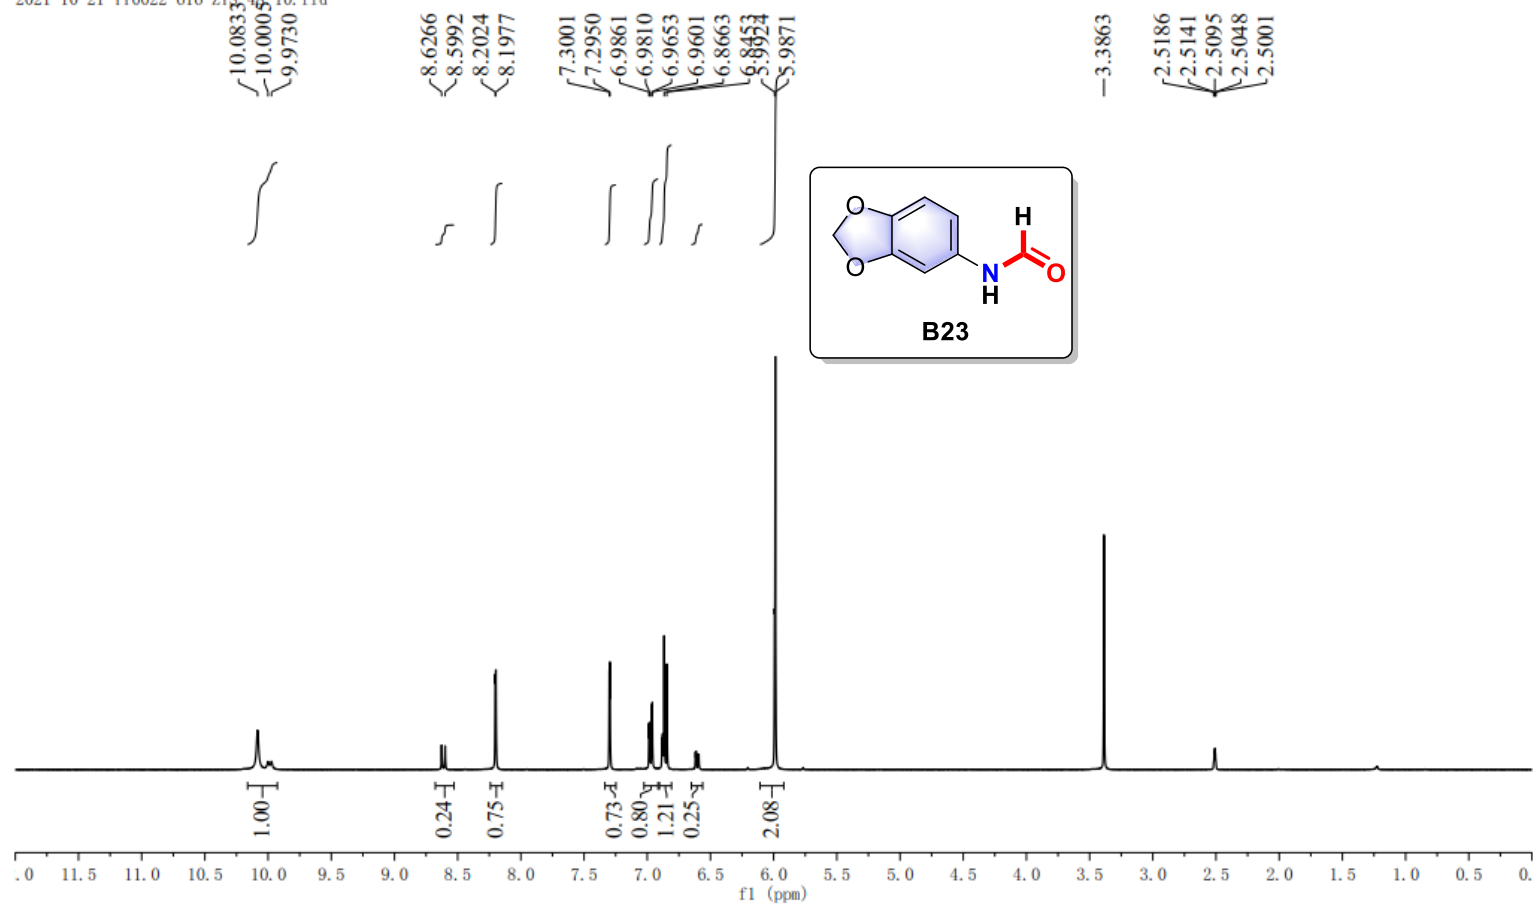

2021-10-27 YY0034-616-ZYS-48.10.fid

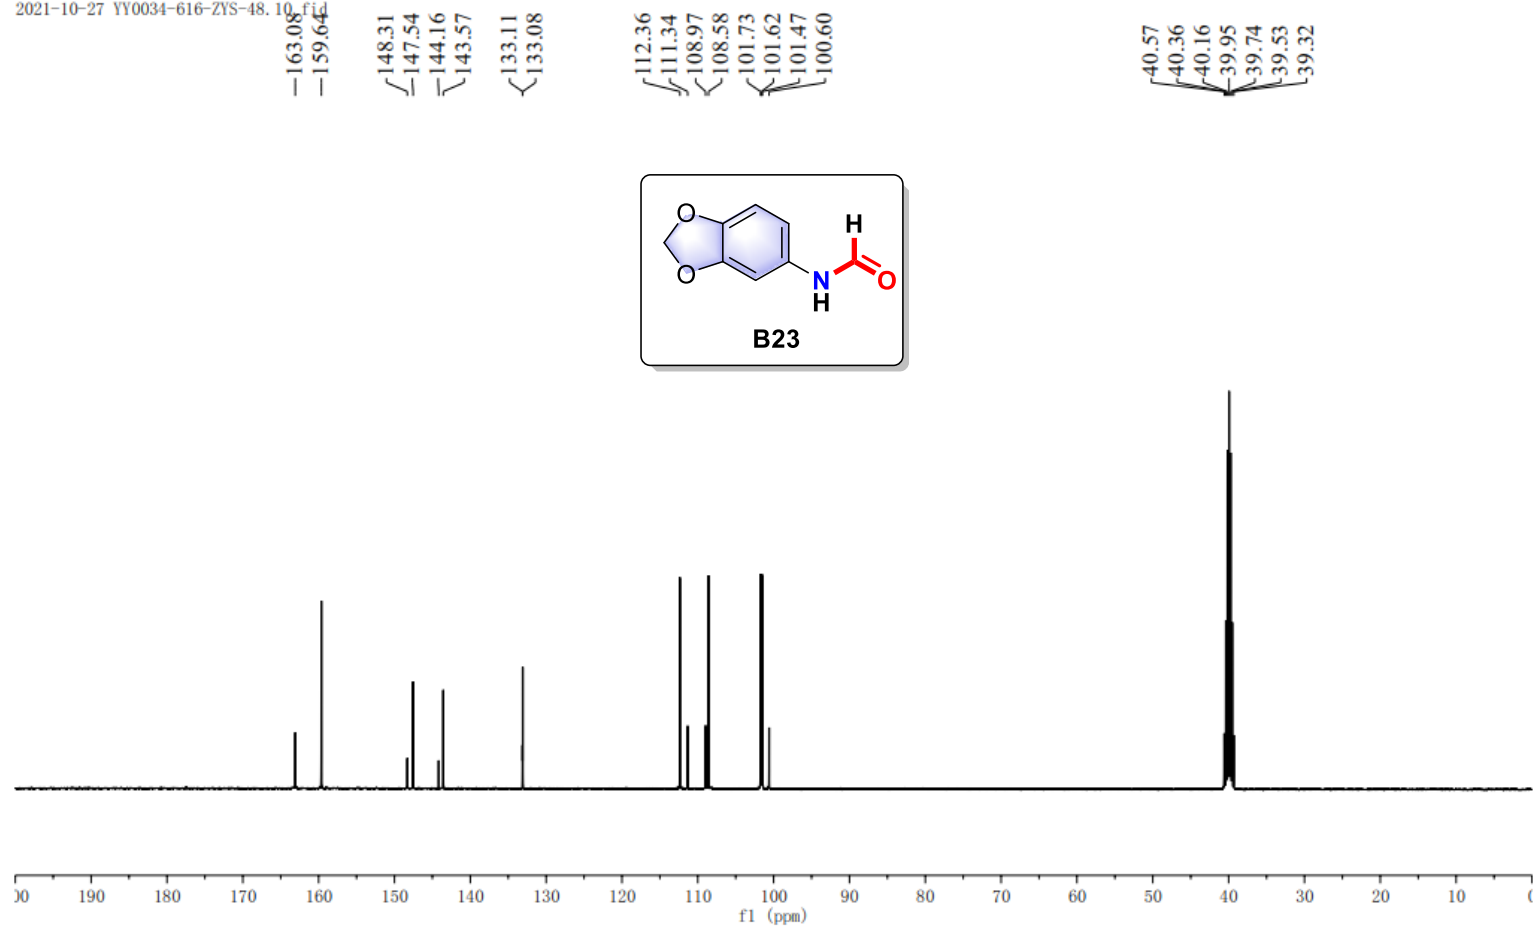

2021-10-09 YY0013616-28-34

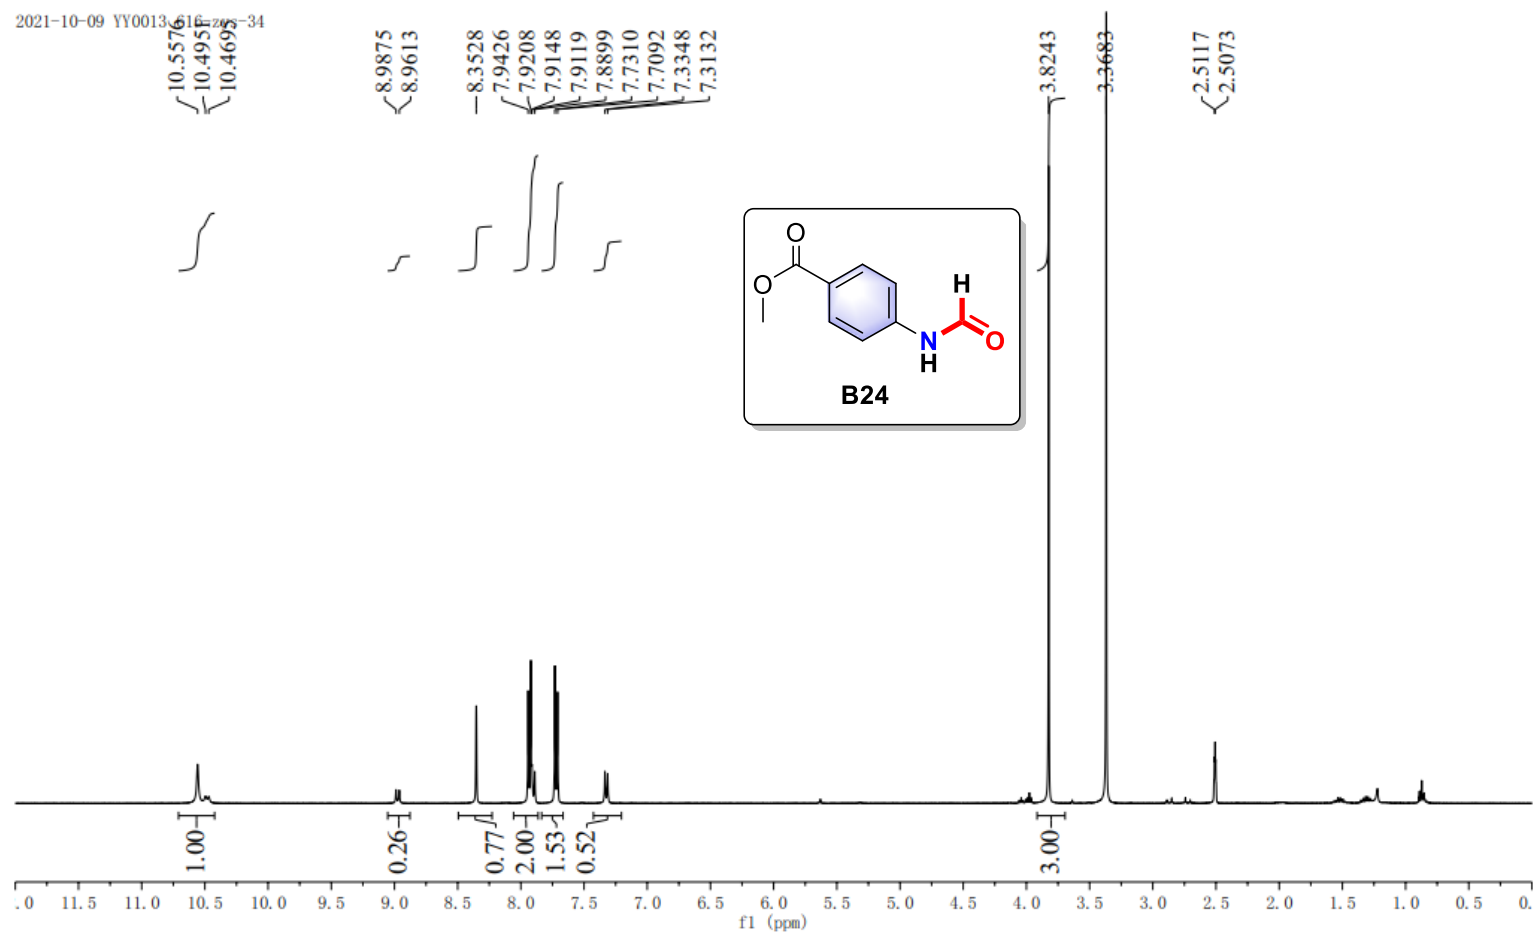

2021-10-12 YY0039 616-zys-34\_10.fid

166.20  
163.04  
160.63

143.44  
142.95

131.26  
130.87  
124.81  
119.11  
116.90

52.38  
40.58  
40.38  
40.17  
39.96  
39.75  
39.54  
39.33

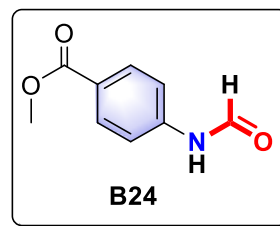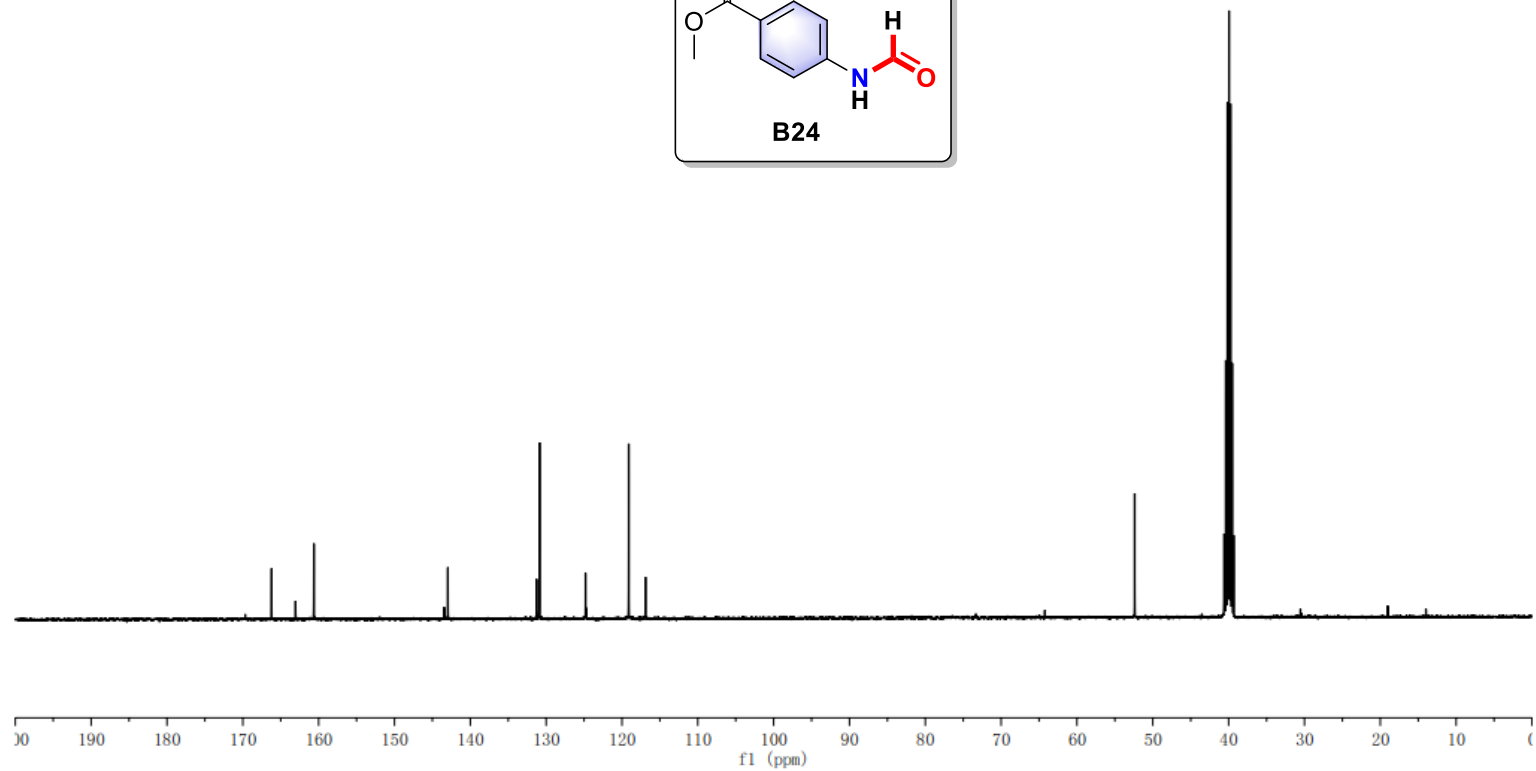

2021-09-23-yy0017-616-zys-14

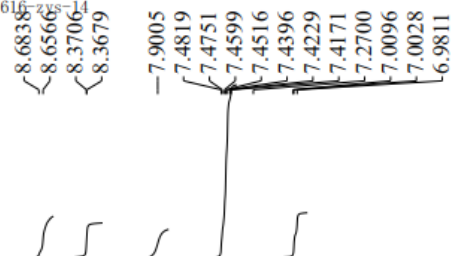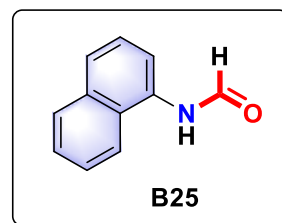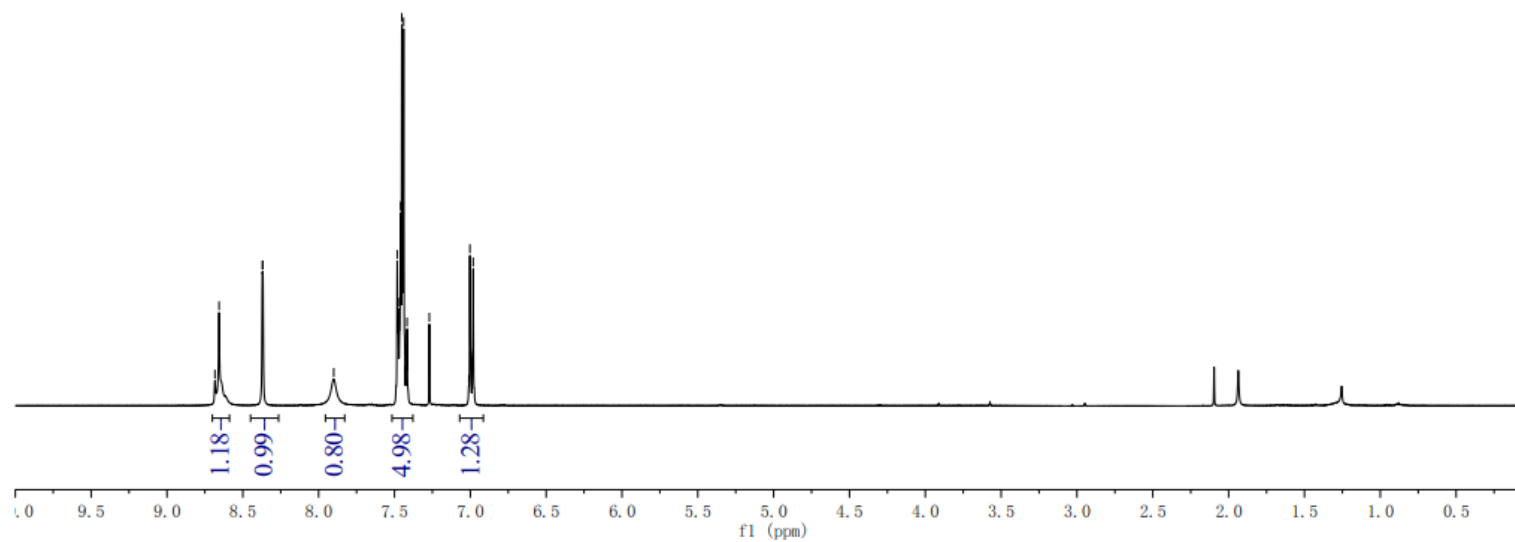

2021-09-29-yy0001-616-zys-14-1

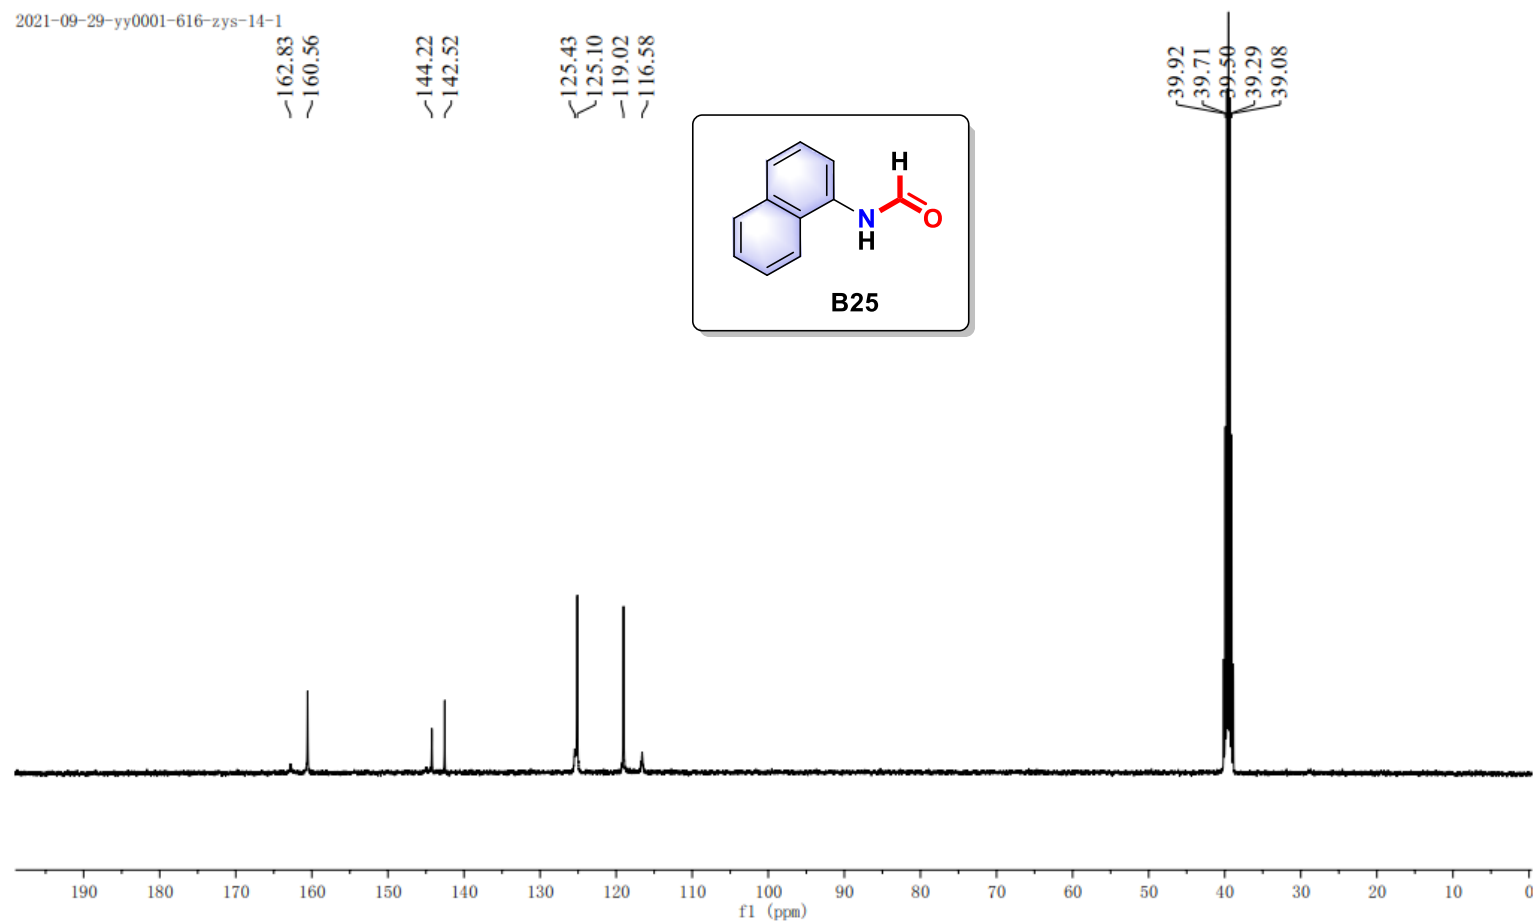

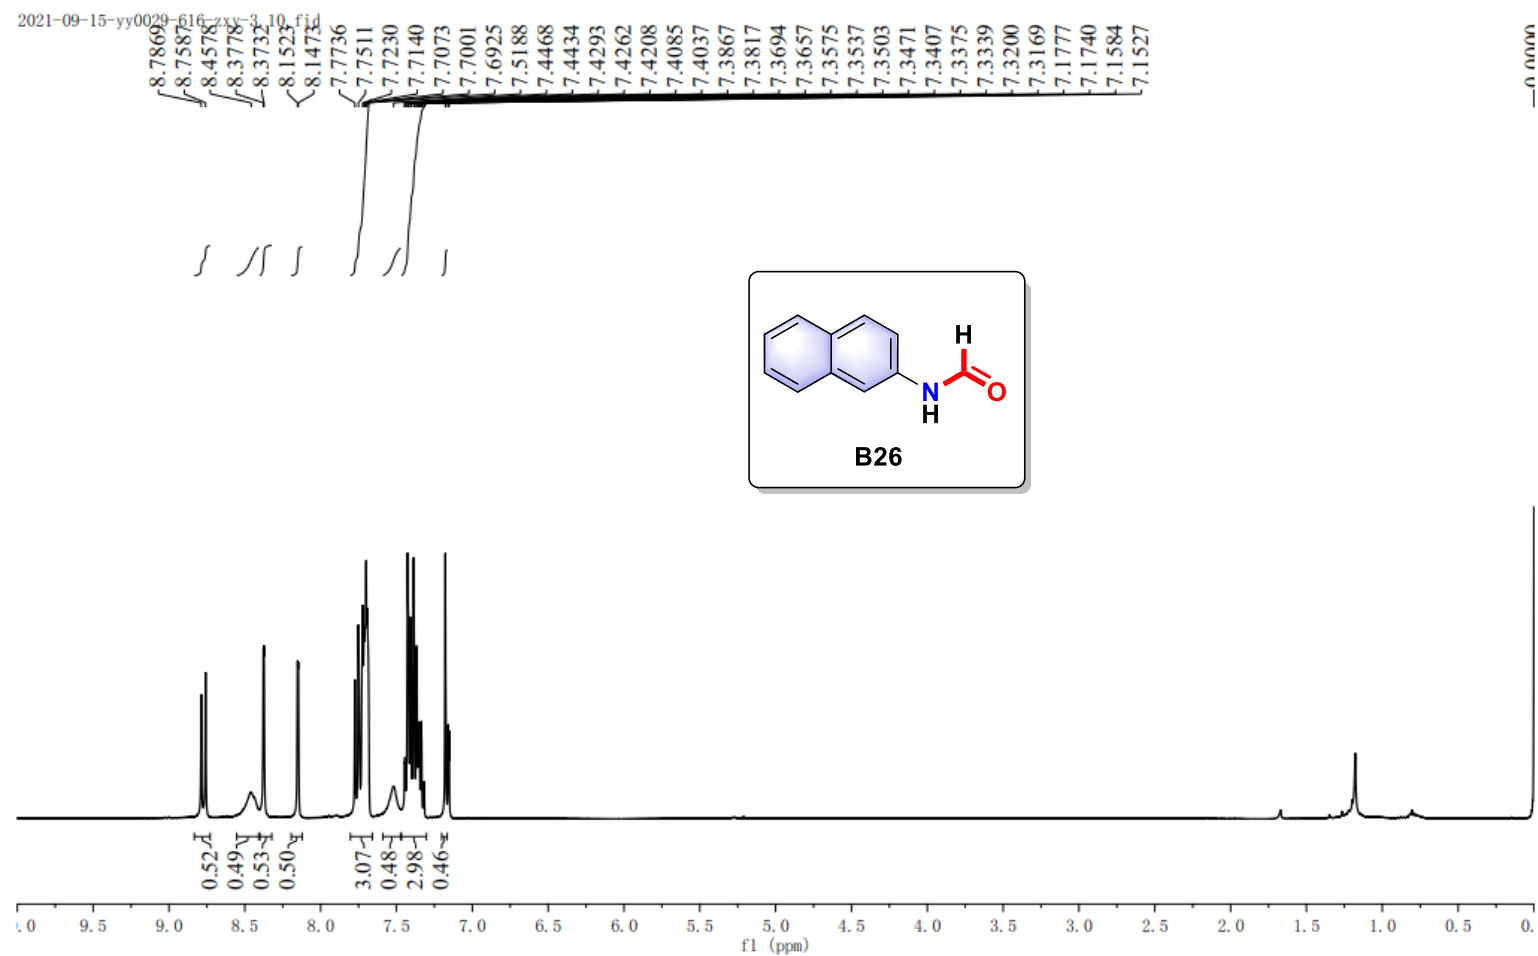

2021-09-18 YY0010-616-zys-3. 10. f1.d

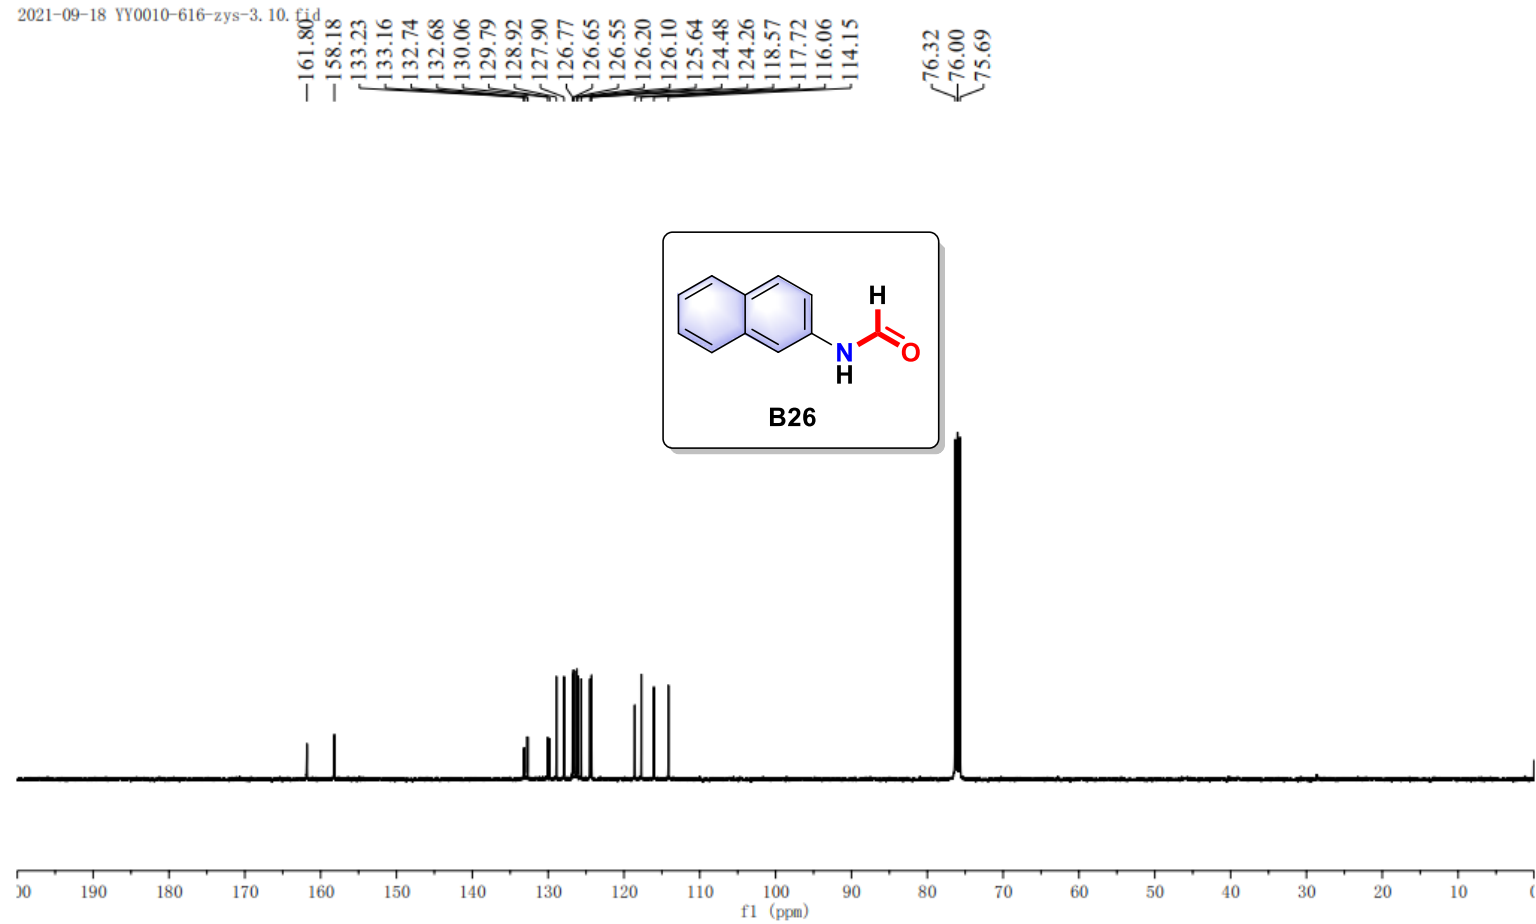

2021-09-28-yy0005-616-zys-25

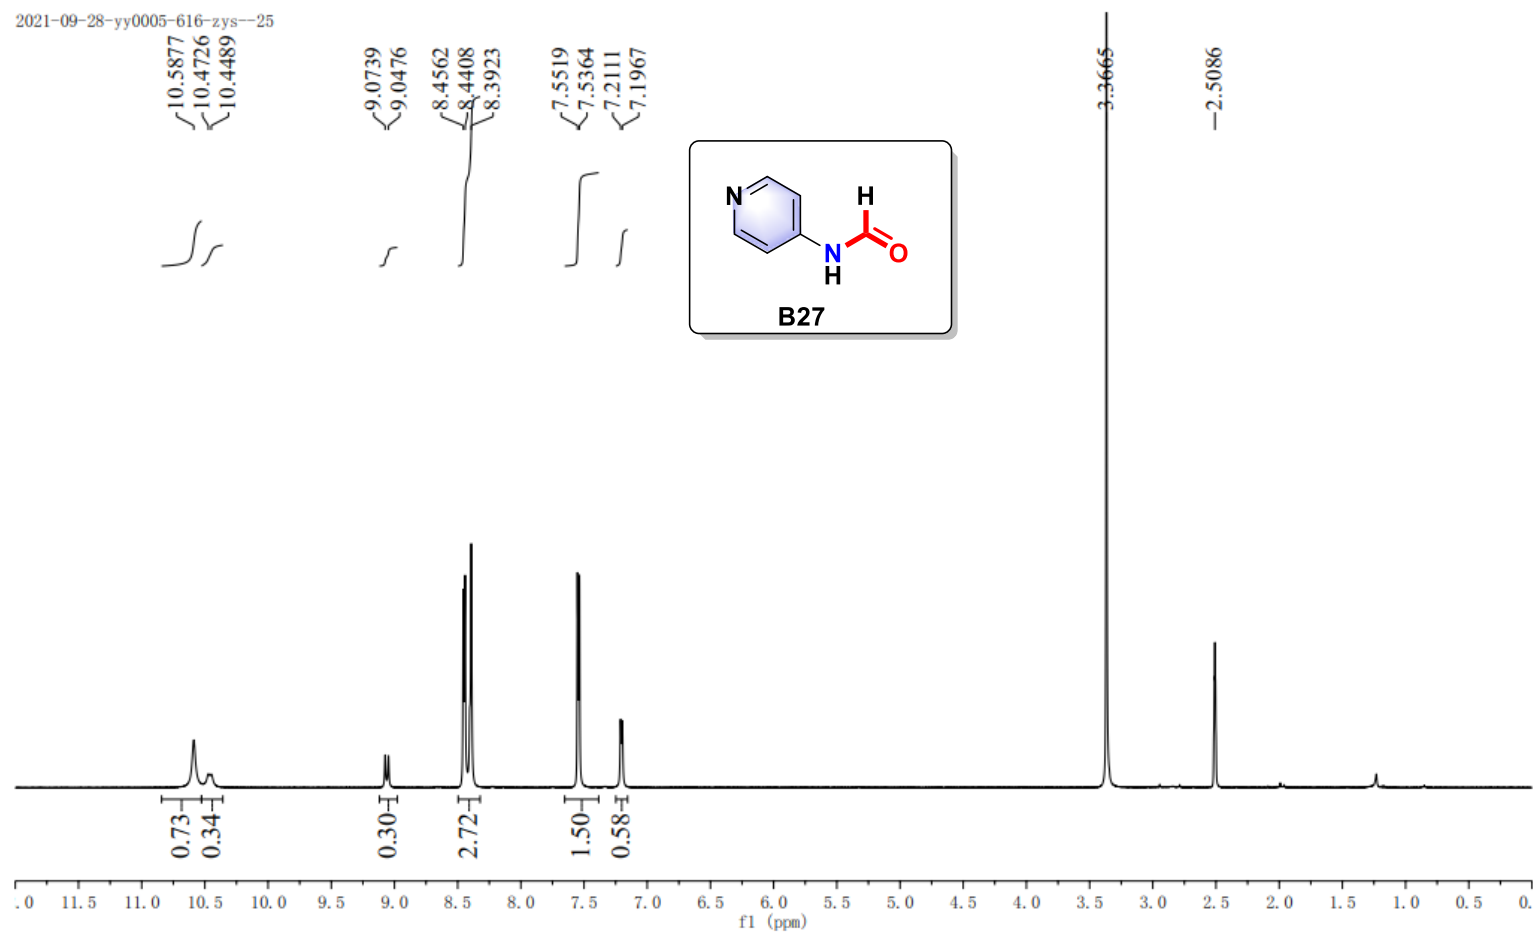

2021-10-08 YY0002 616-zys-25

163.00  
161.33  
151.05  
151.00  
146.03  
145.07

113.82  
111.62

40.60  
40.39  
40.18  
39.97  
39.76  
39.55  
39.35

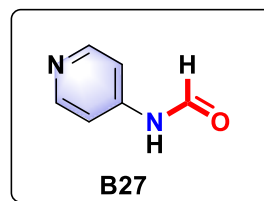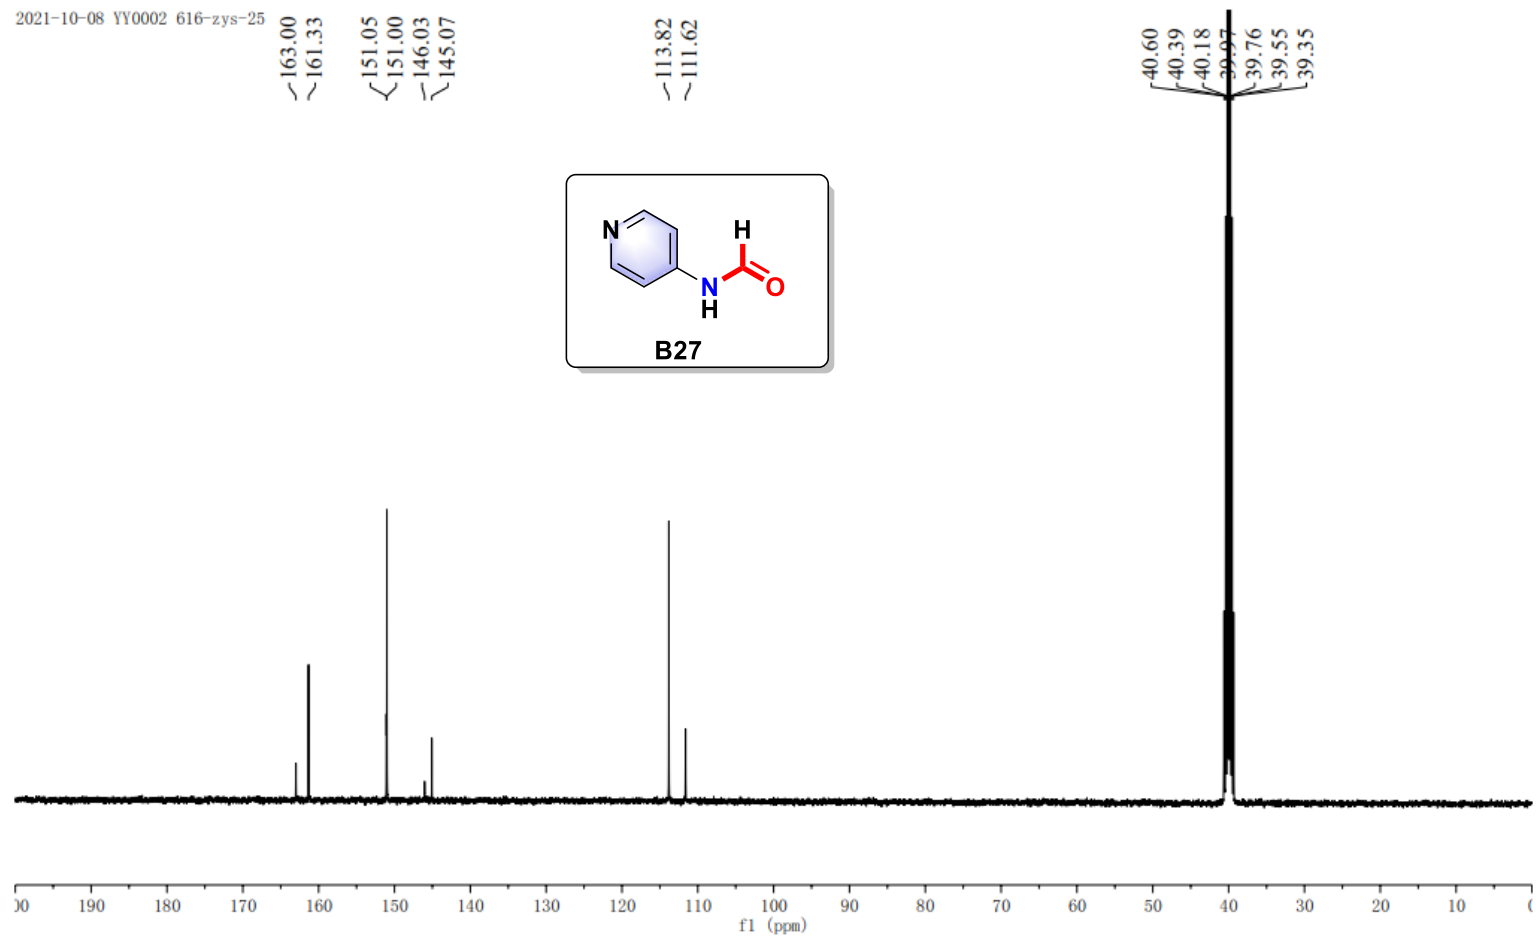

2021-09-28-yy0005-616-zys-33

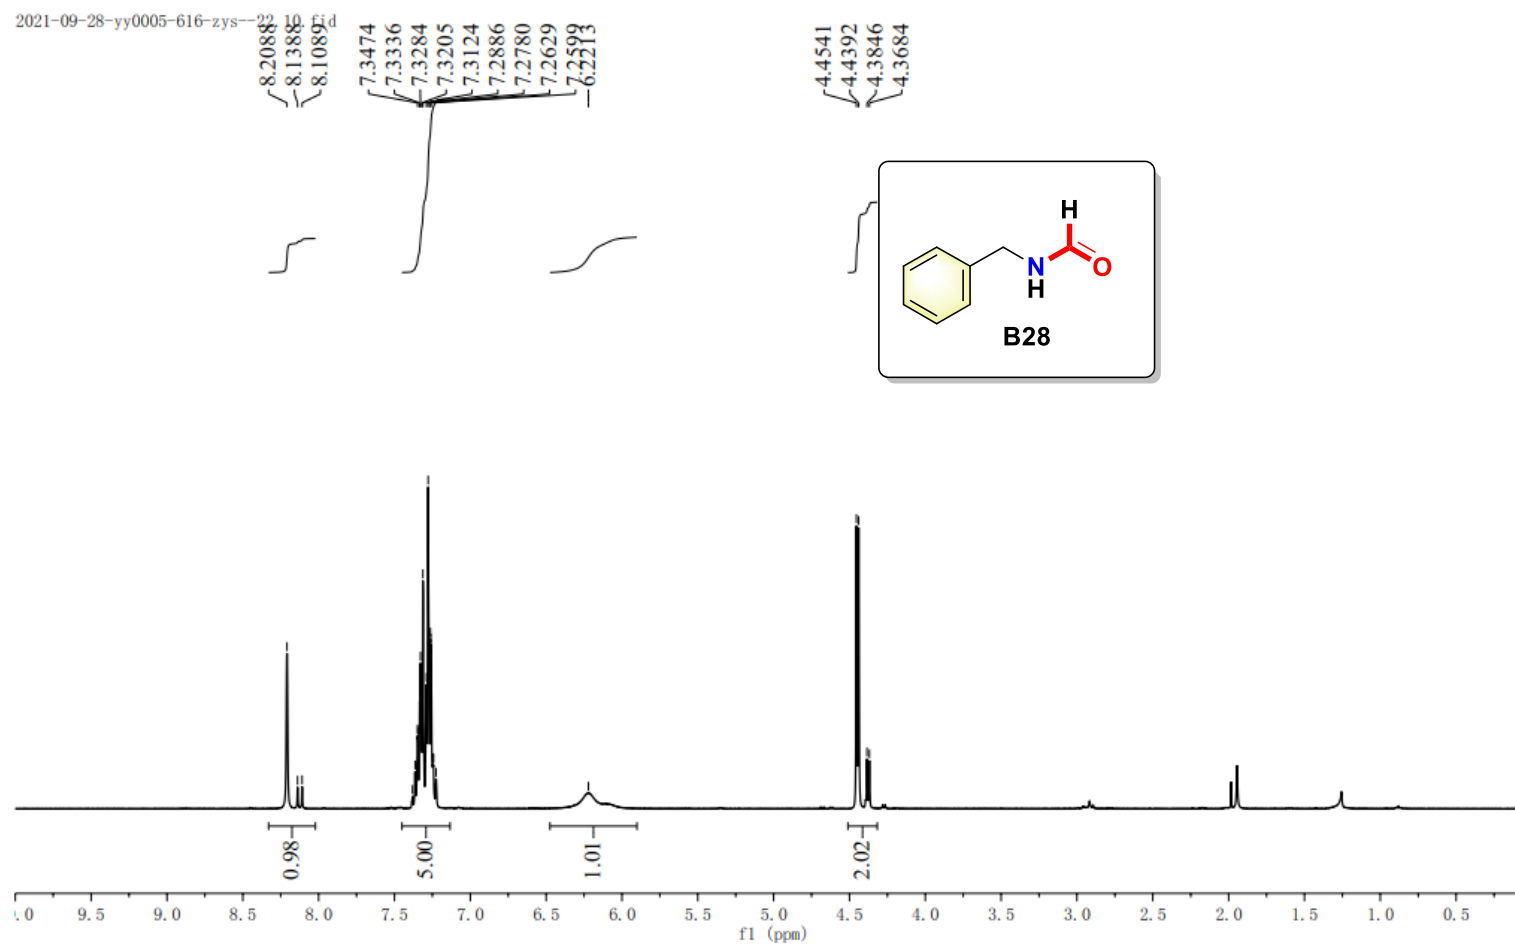

2021-10-08 YY0002 616-zys-22

— 164.82  
— 161.26

— 137.67  
— 128.74  
— 127.74  
— 126.99

— 77.45  
— 77.13  
— 76.81

— 45.67  
— 42.10

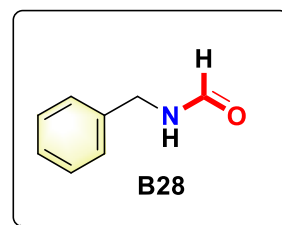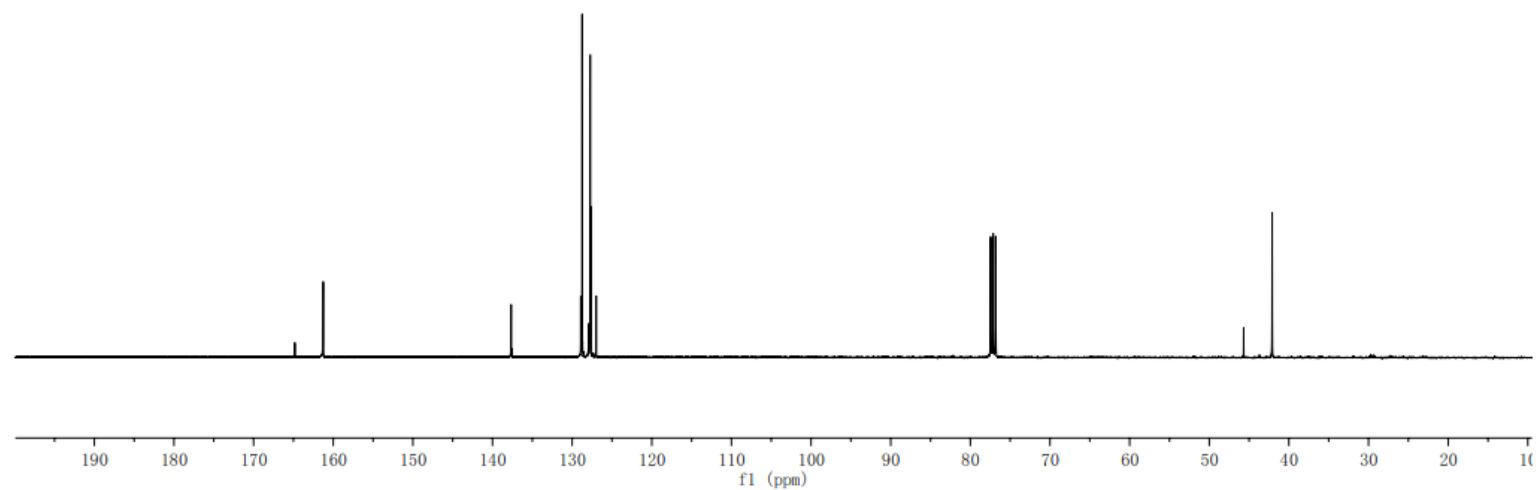

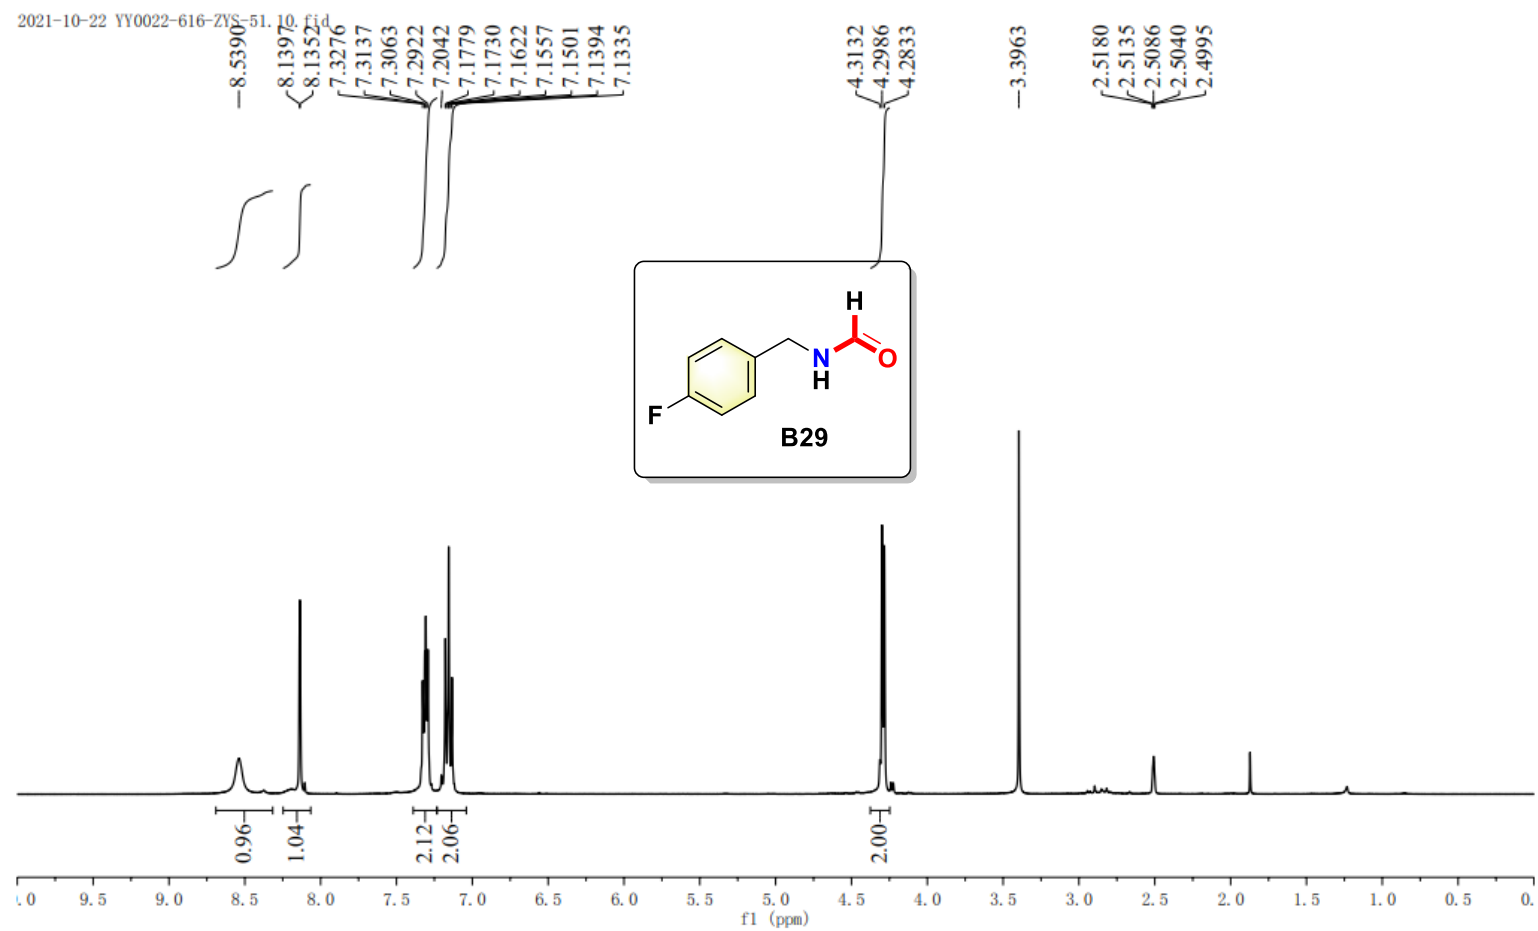

2021-10-27 YY0034-616-ZYS-51.tif

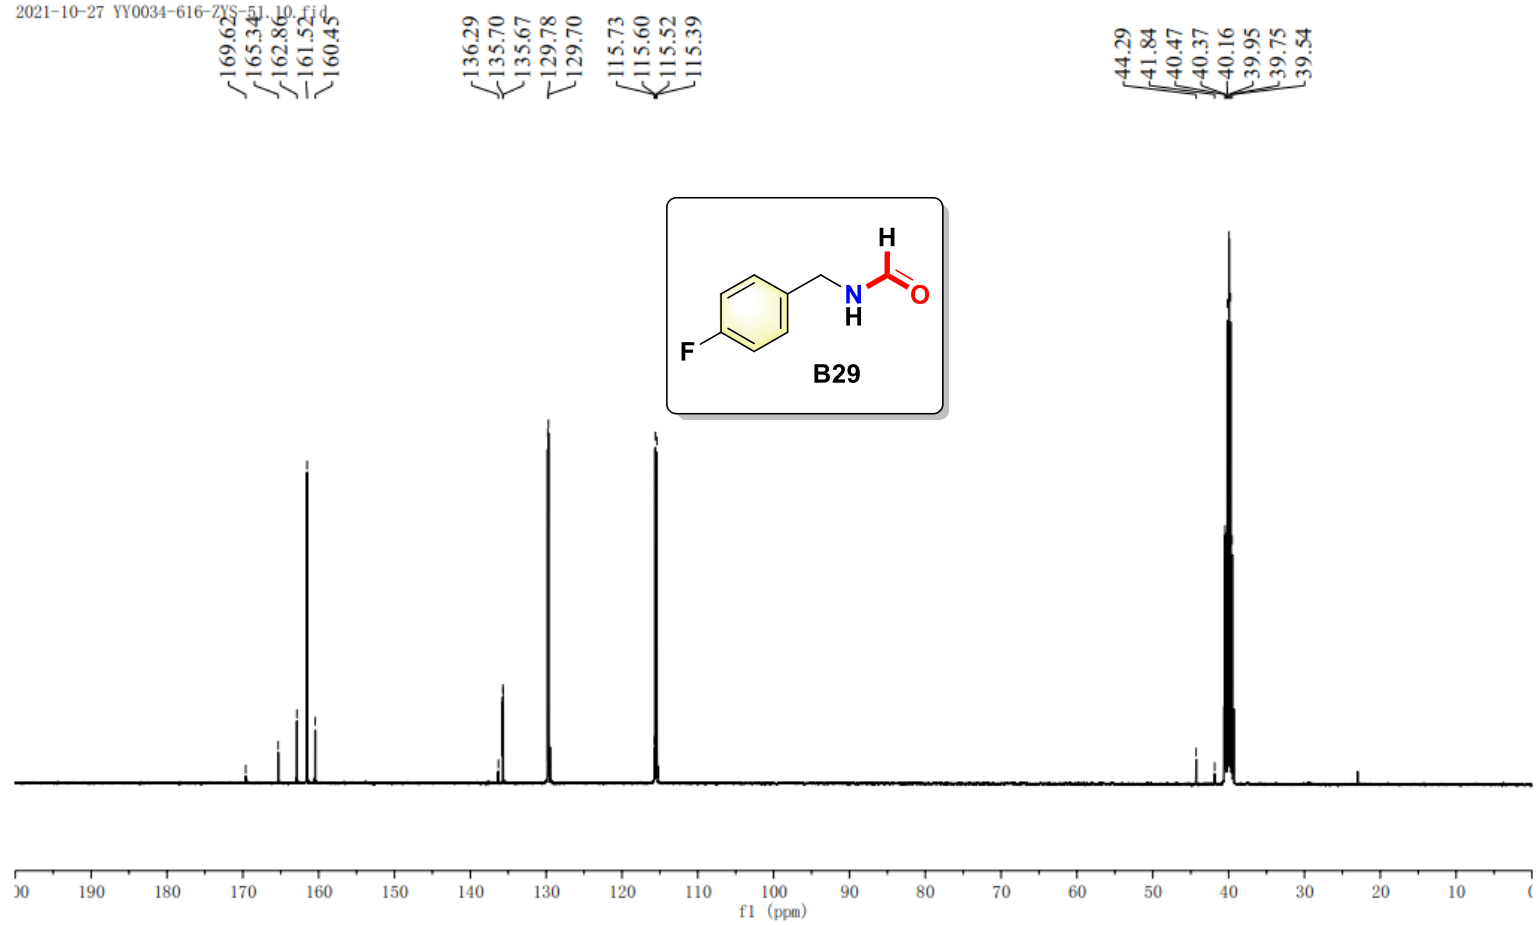

2021-10-27 YY0034-616-ZYS-51. 11. fid

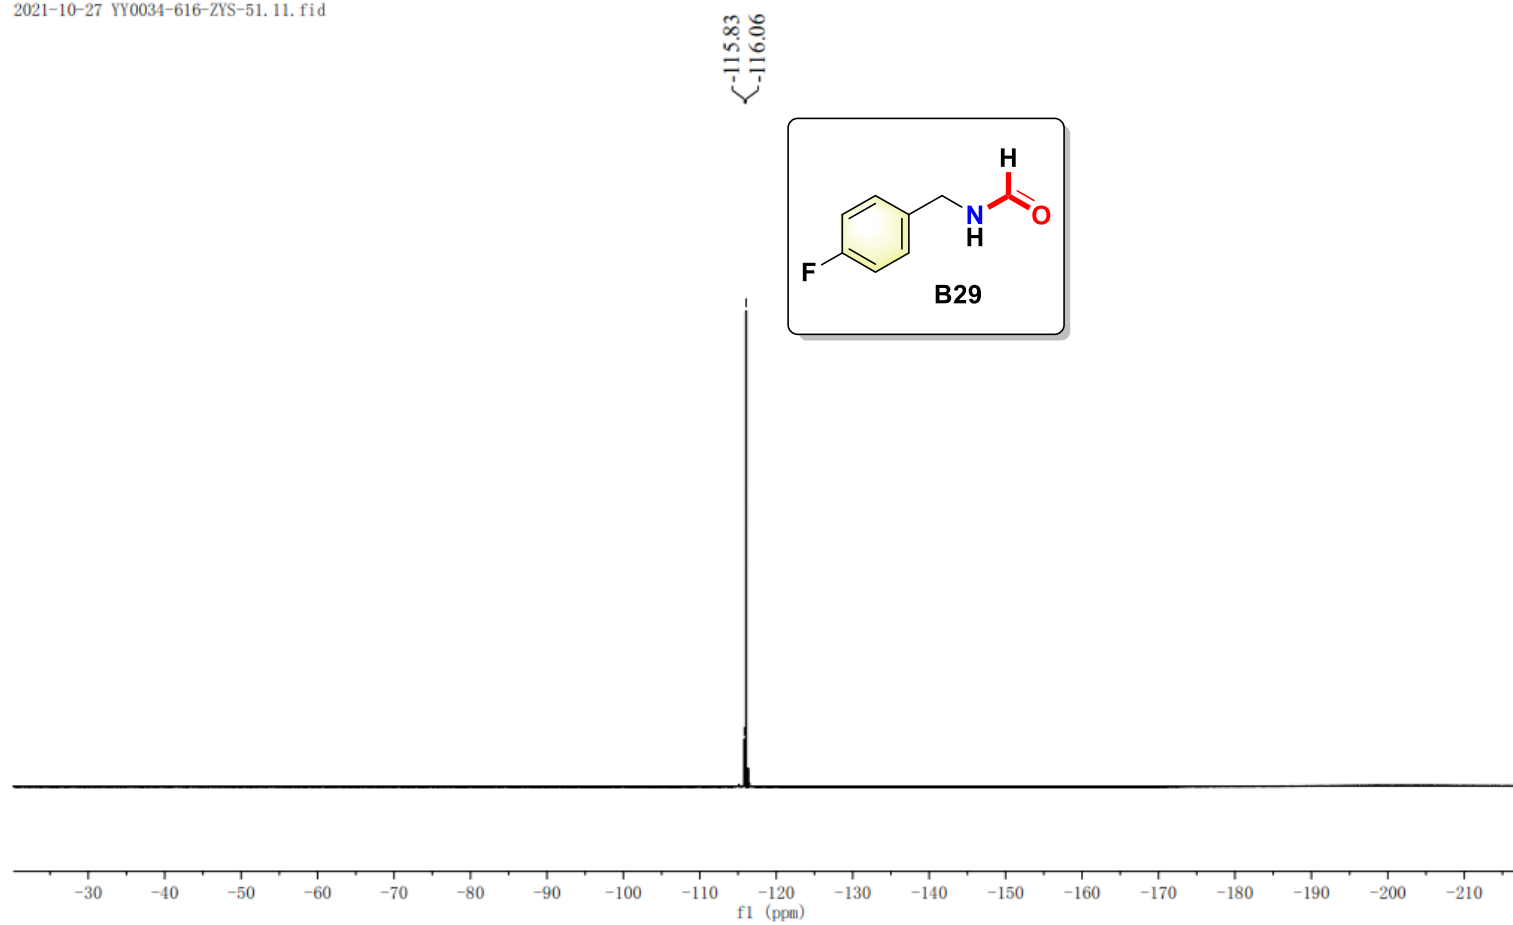

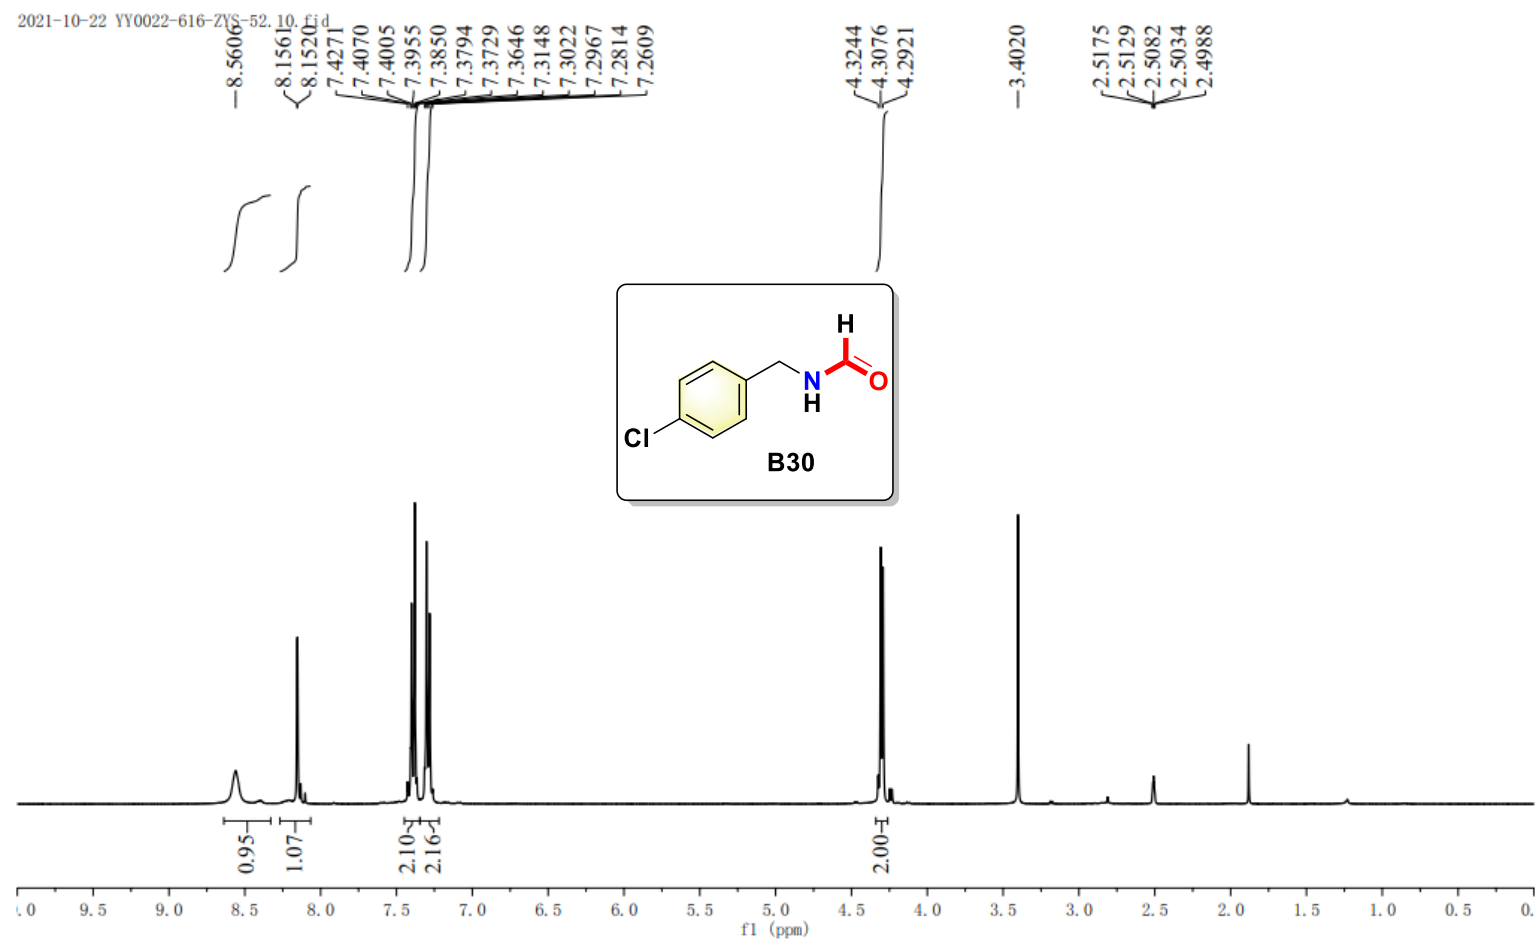

2021-10-27 YY0034-616-ZYS-52\_10.fid

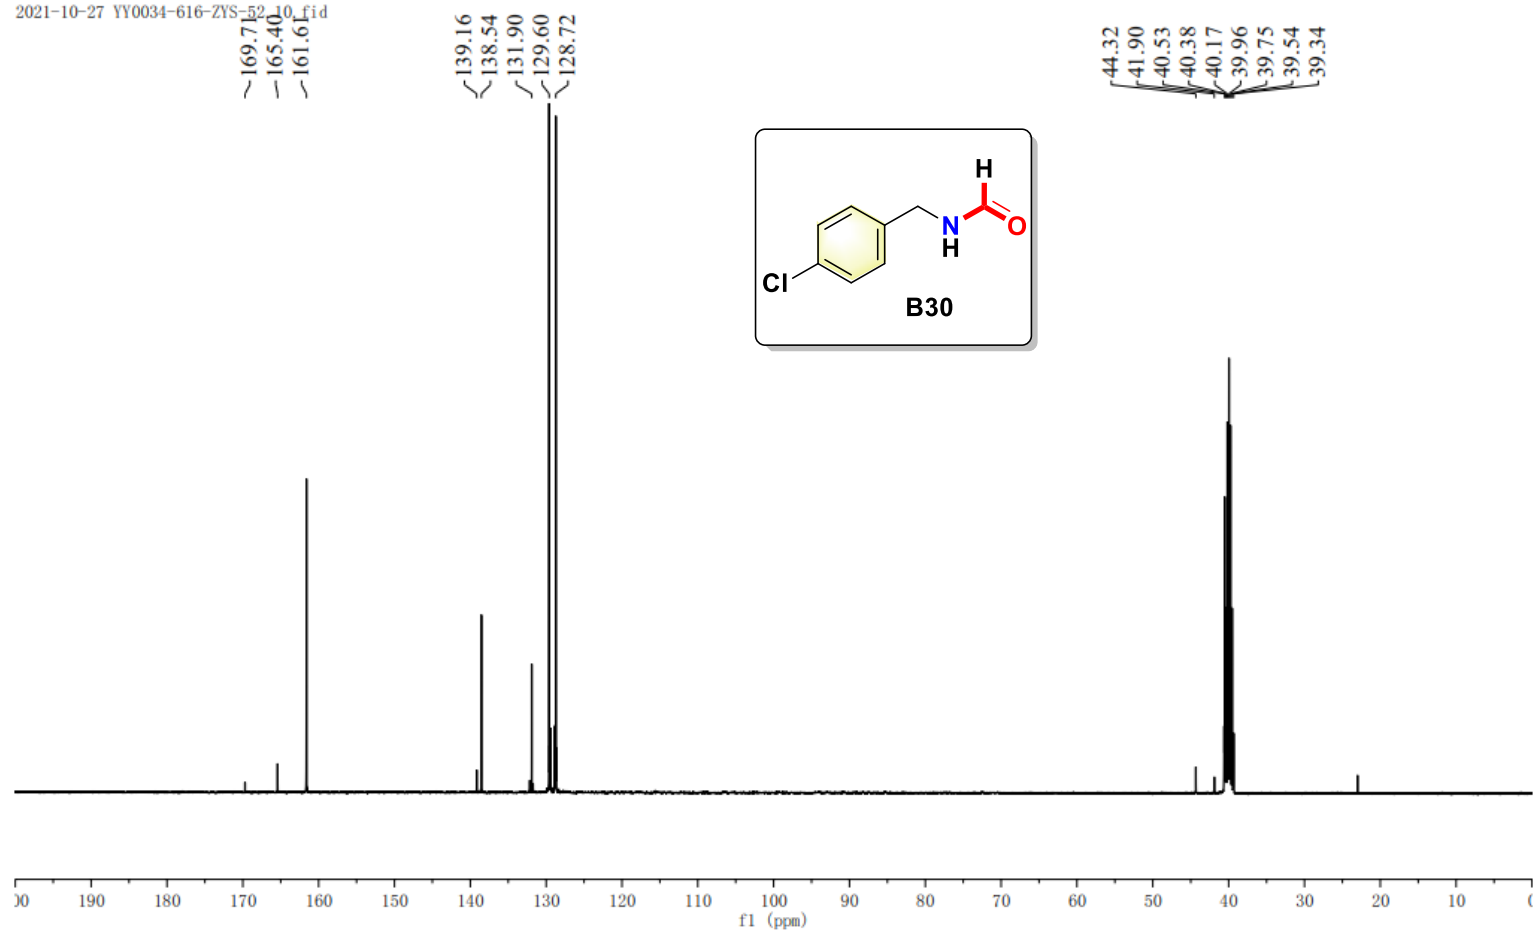

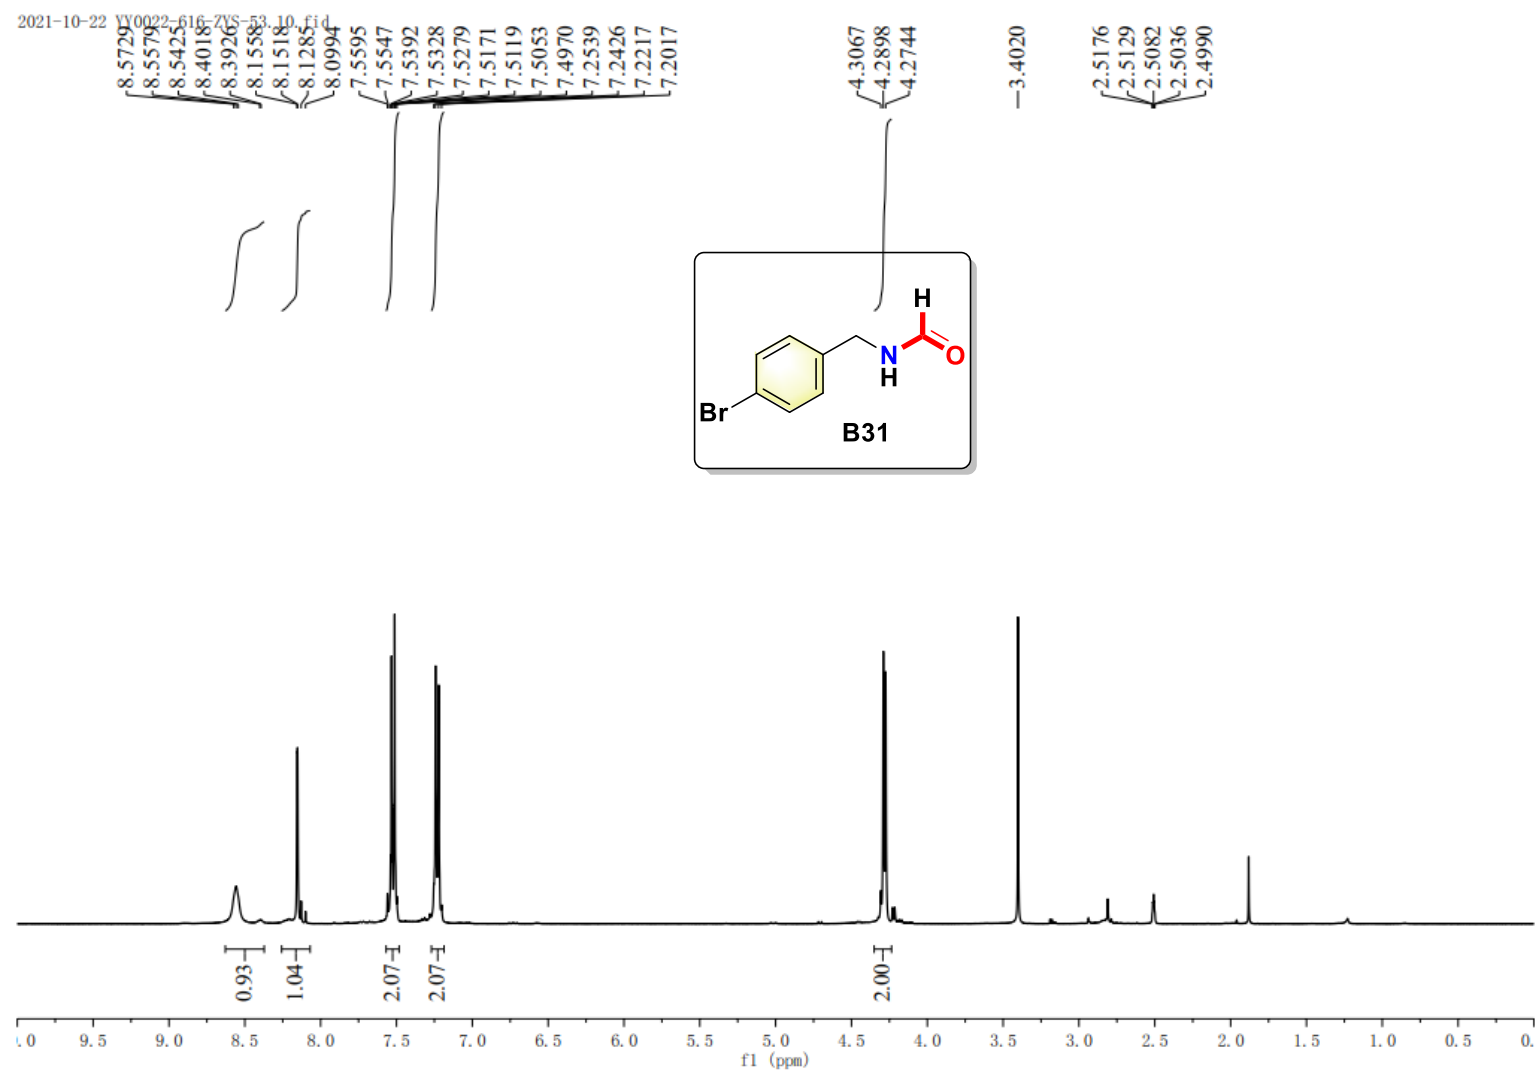

2021-10-27 YY0034-616-ZYS-53.10.fid

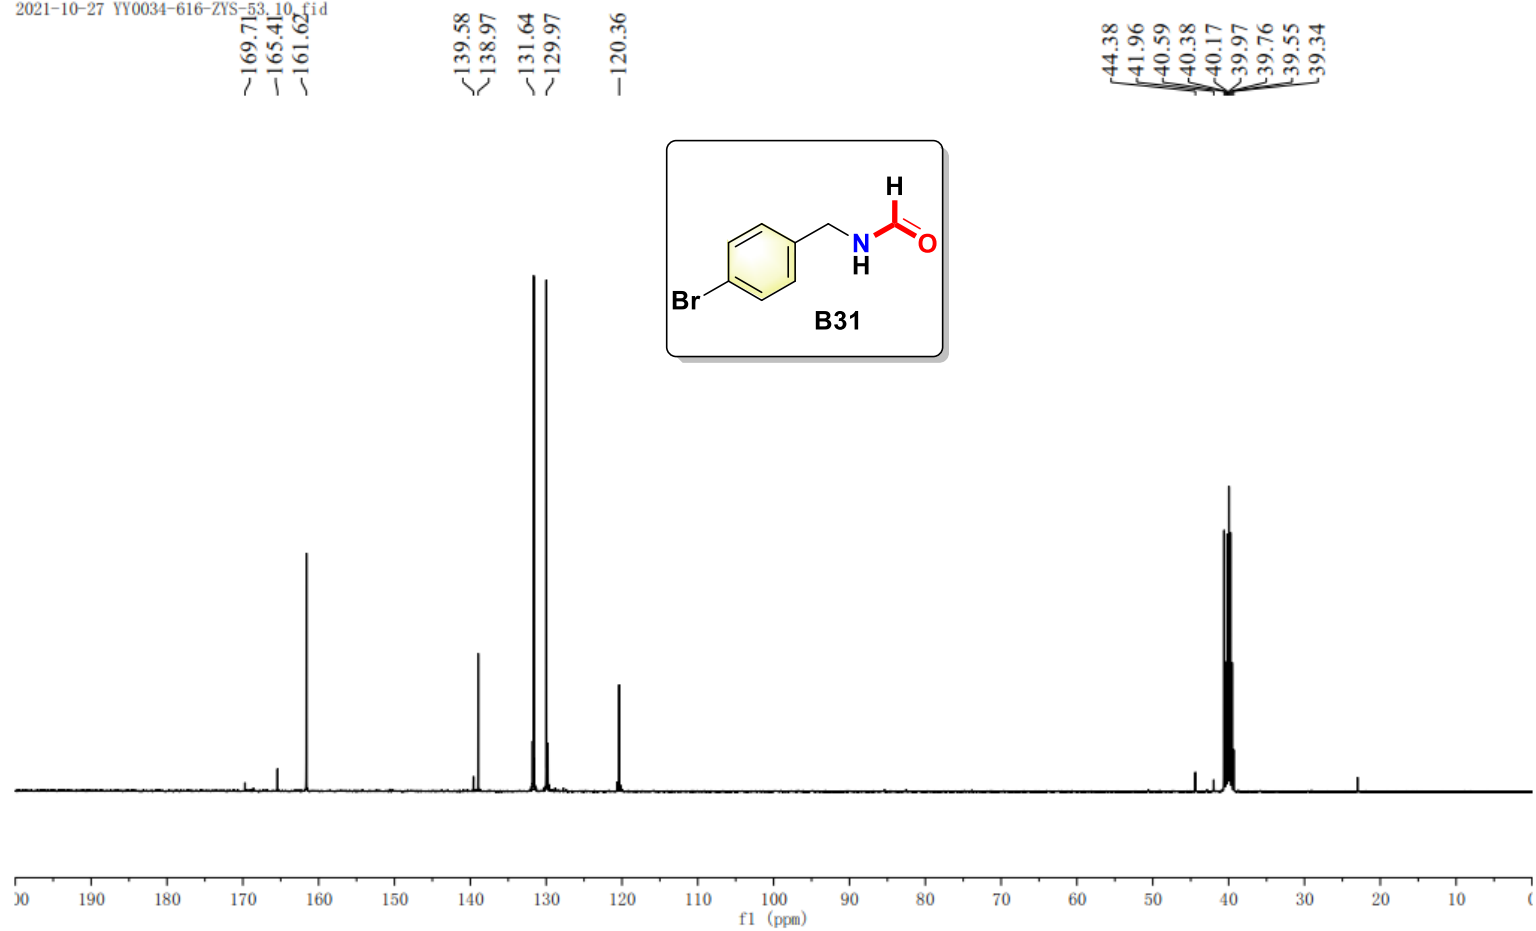

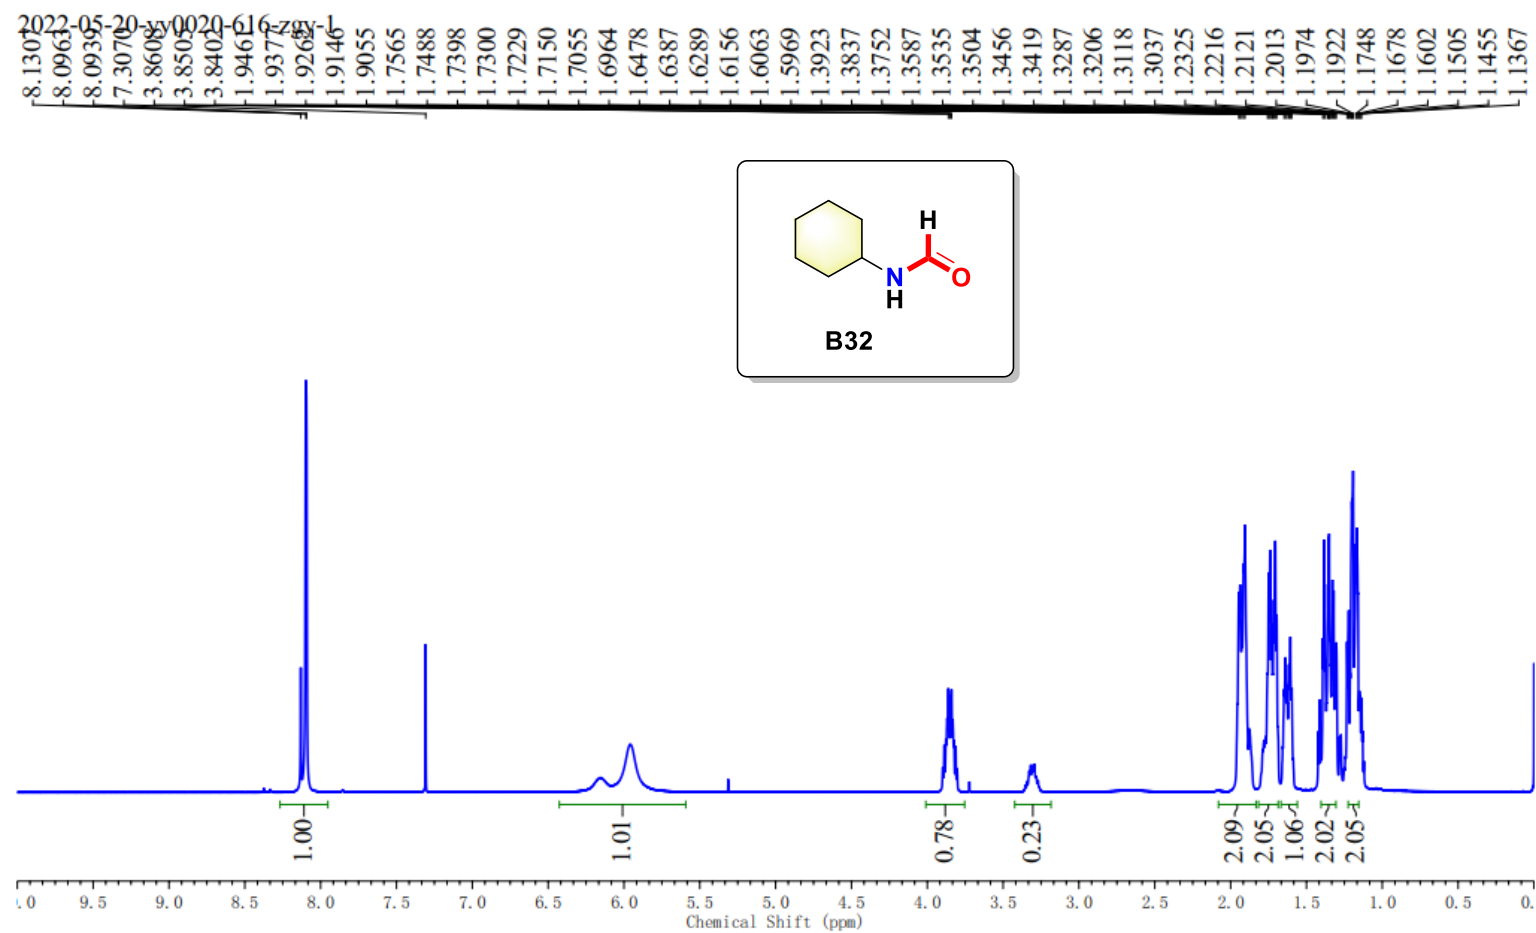

2022-05-20-yy0020-616-zy-1

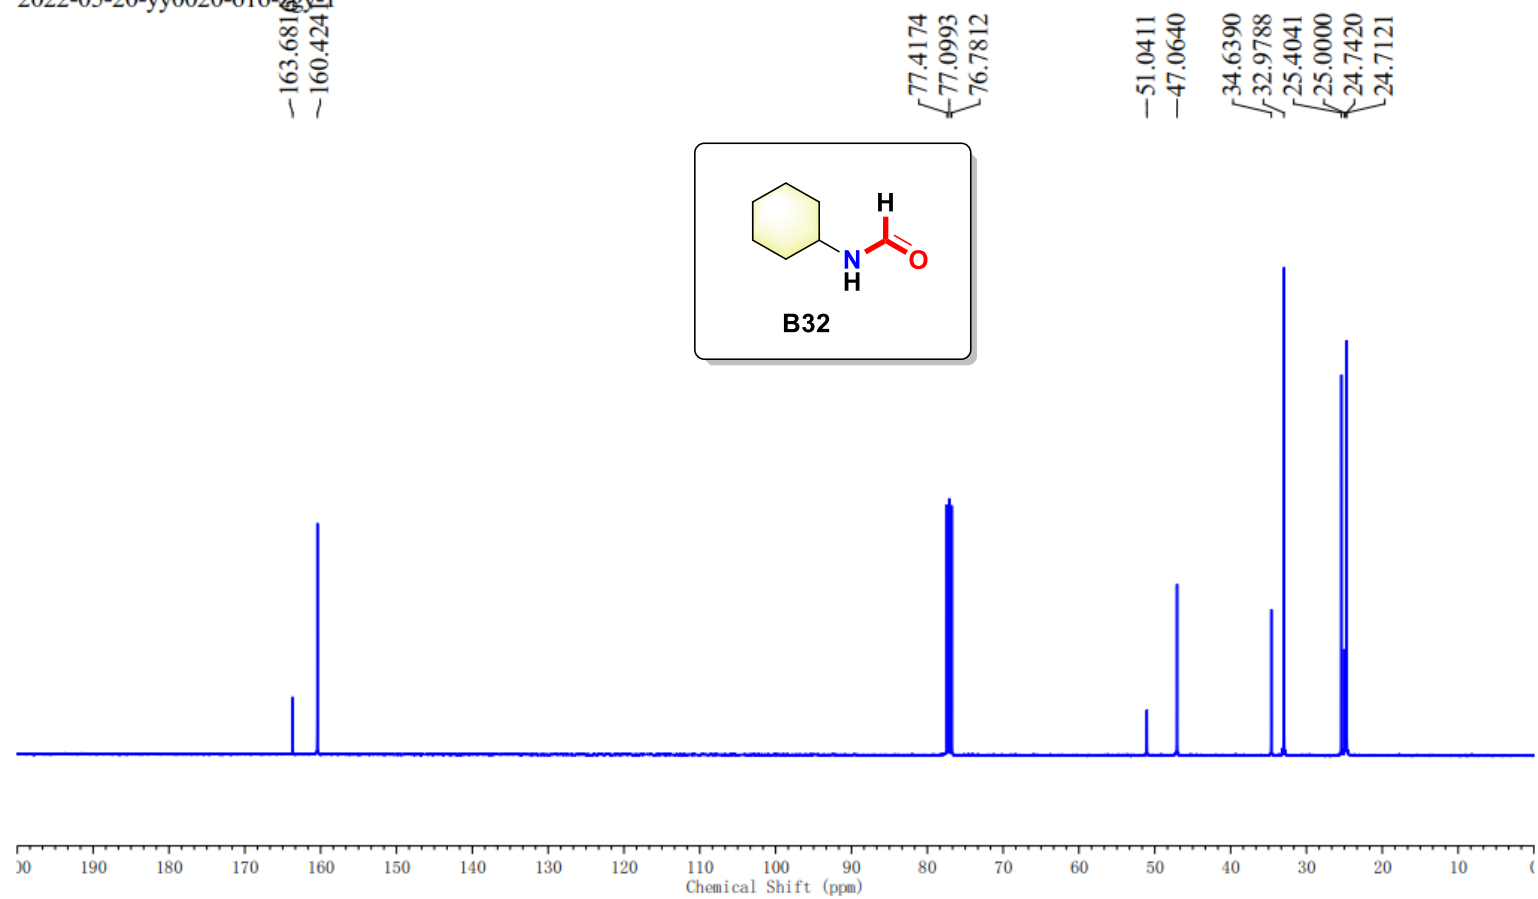

2022-05-20-yy0020-616-zgy-3

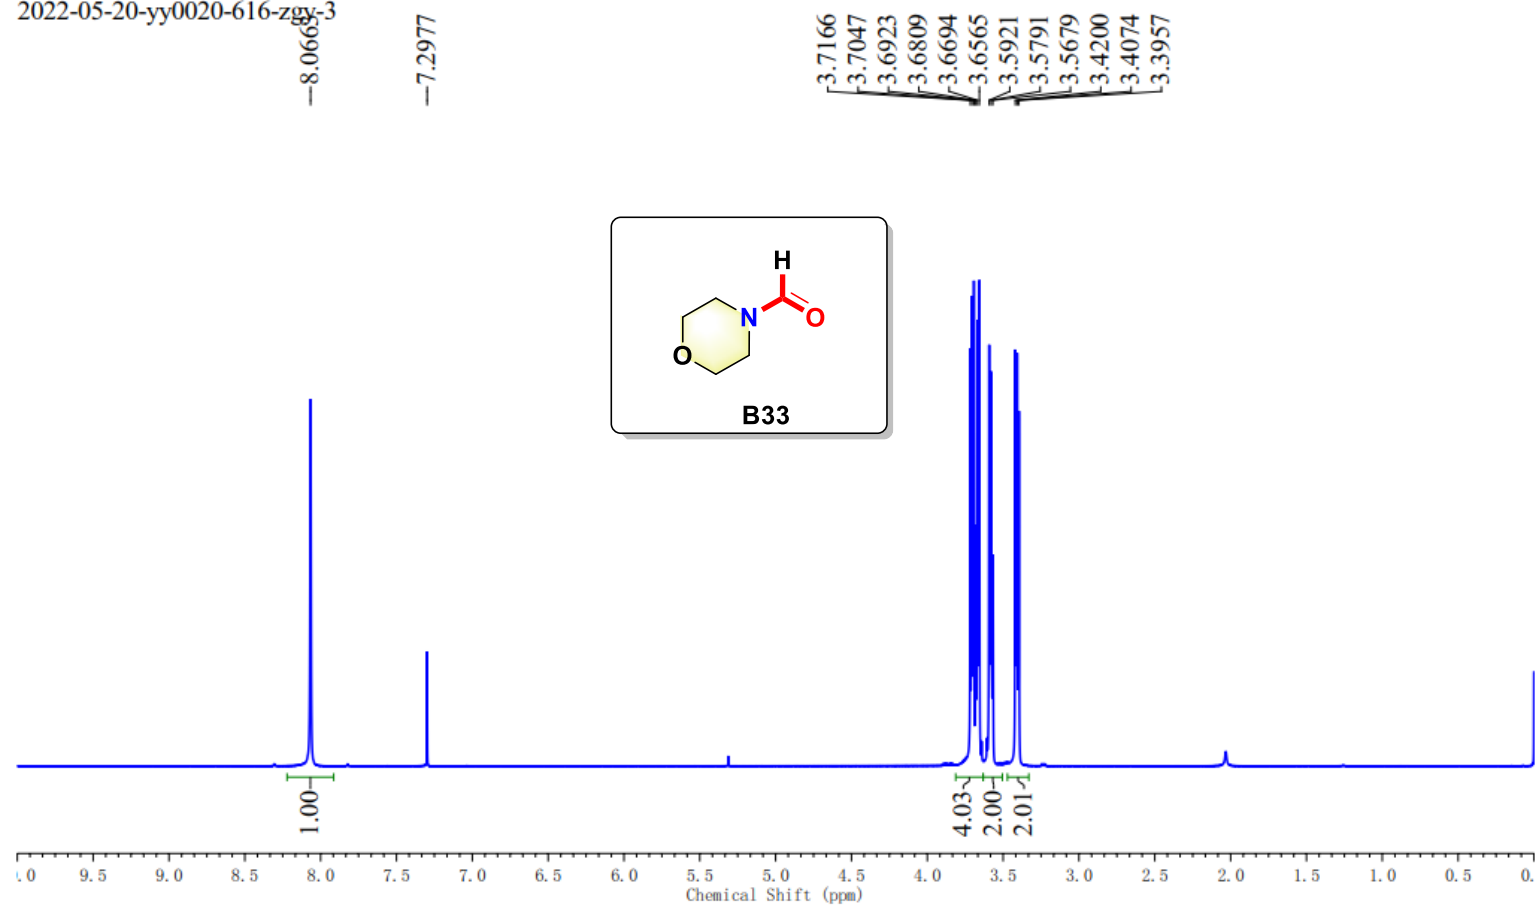

2022-05-20-yy0020-616-zgy-3

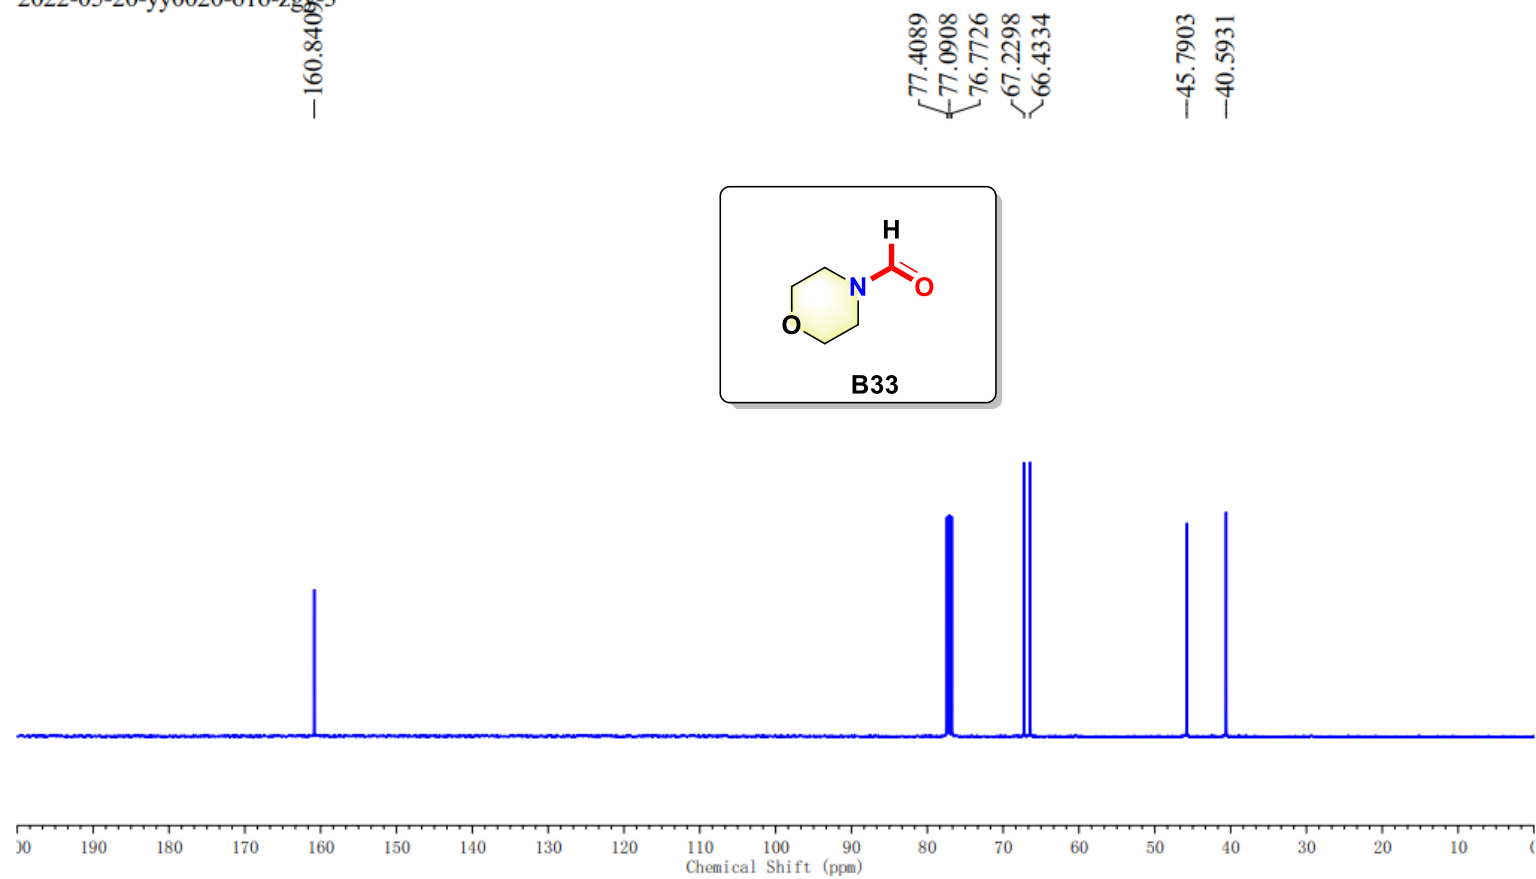

2021-09-28-yy0005-616-zys-24.10.fid

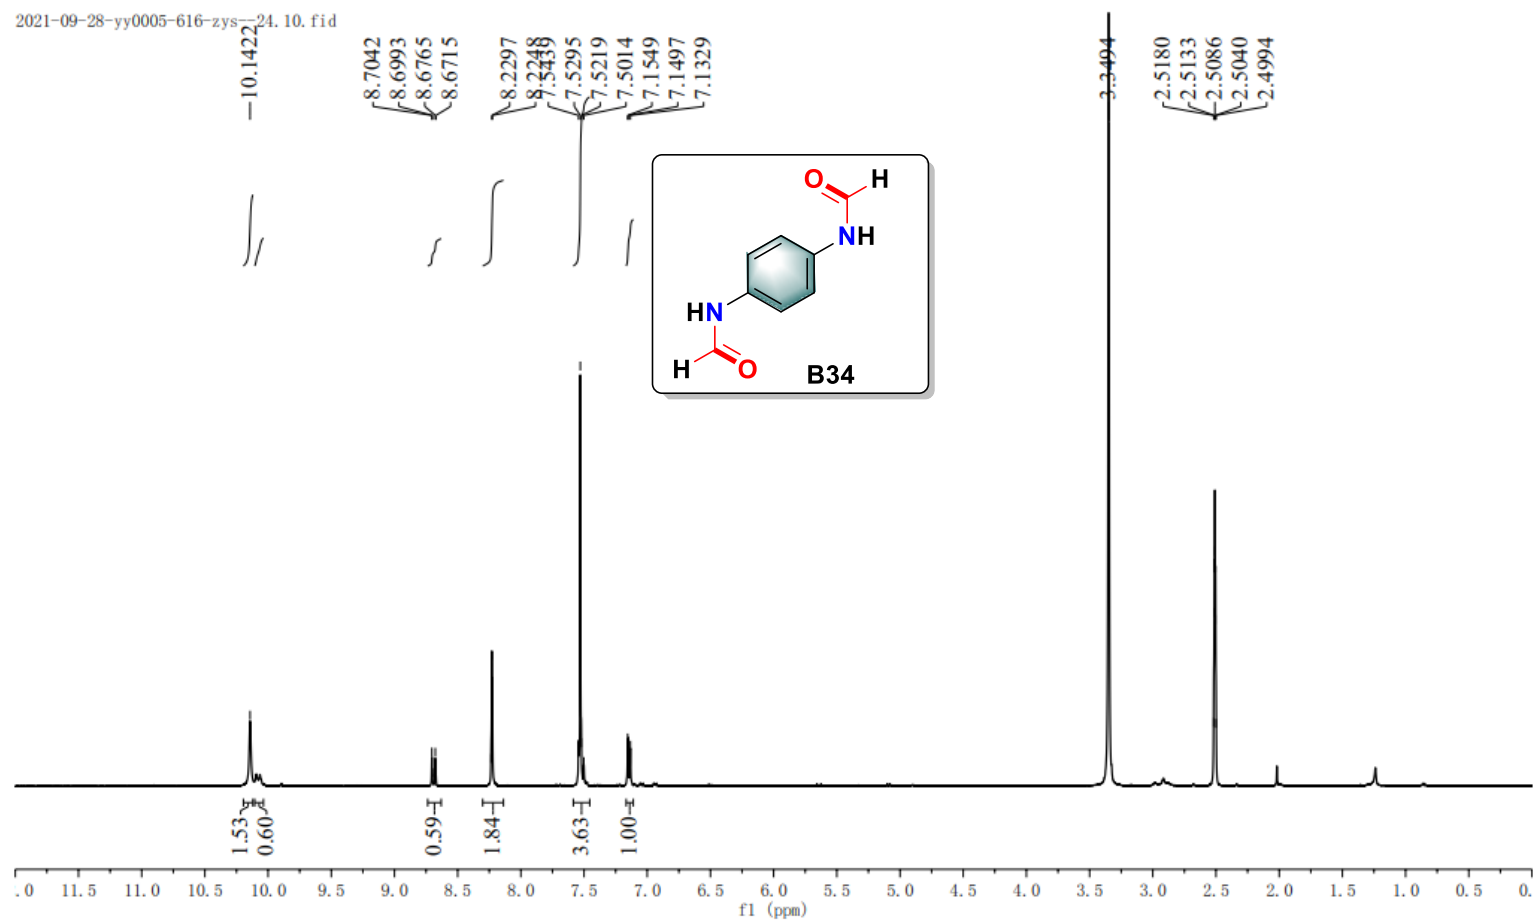

2021-10-08 YY0002 616-zys-24.10.fid

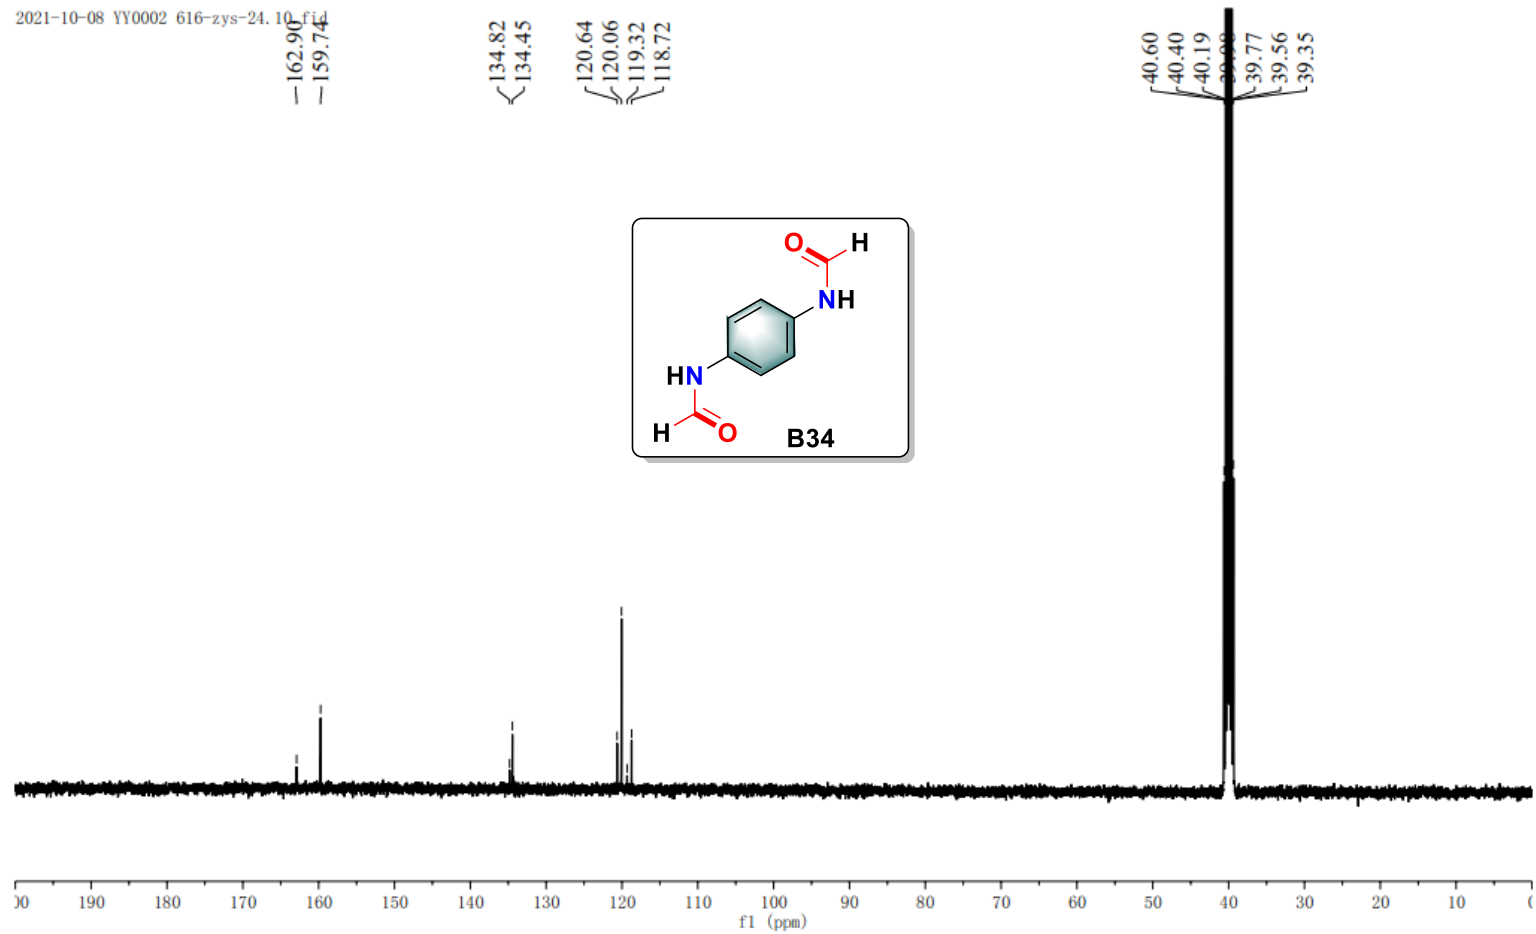

2021-09-23-yy0017-616-zys-13

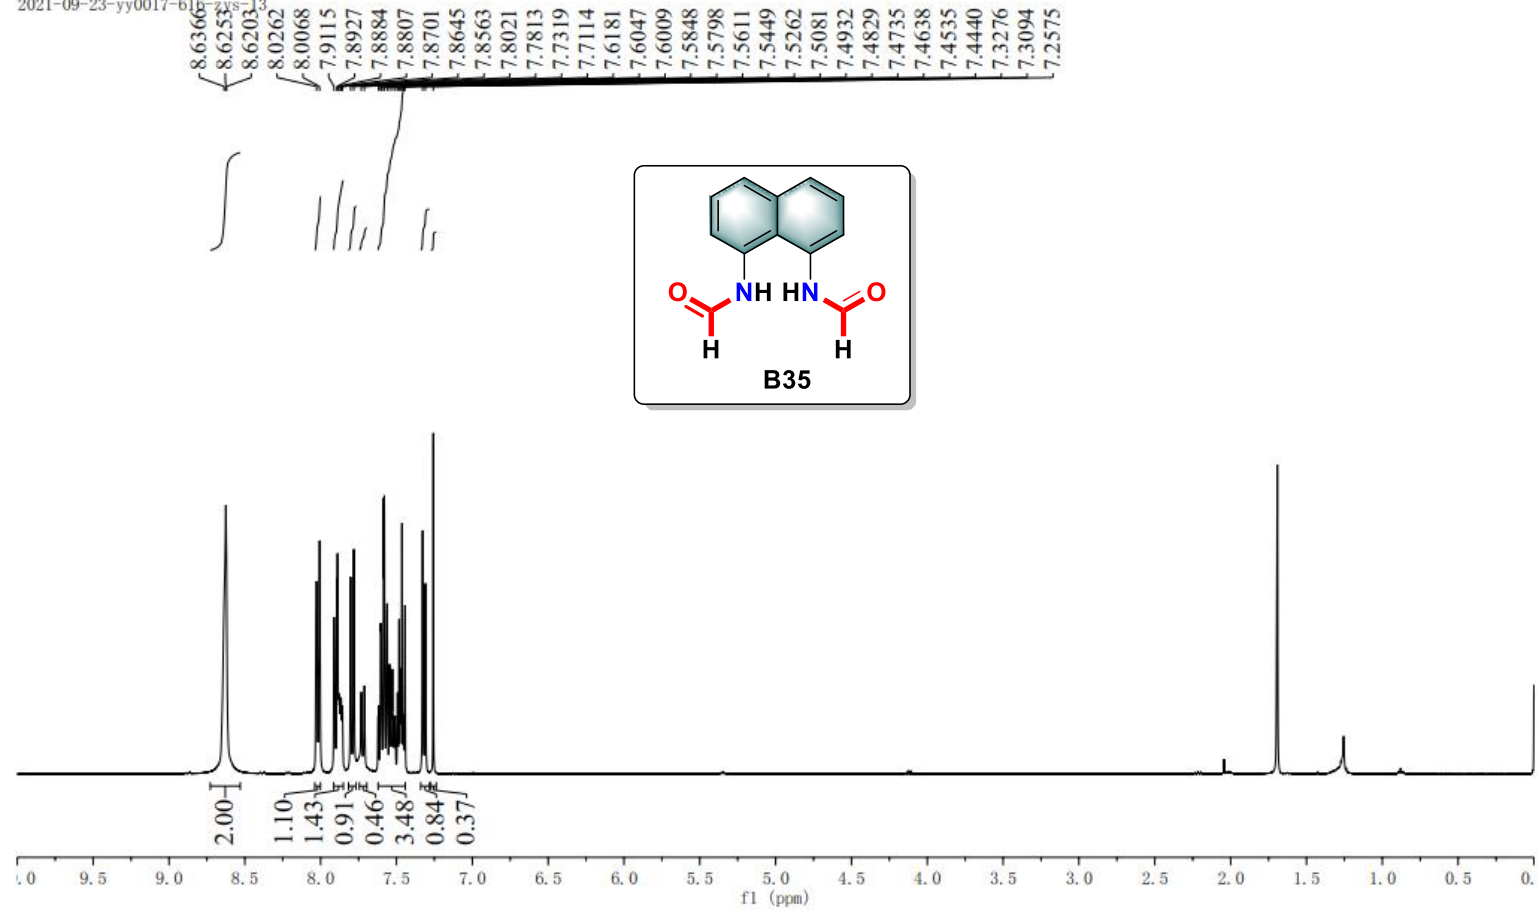

2021-09-25-yy0003-616-zys-12.10.fid

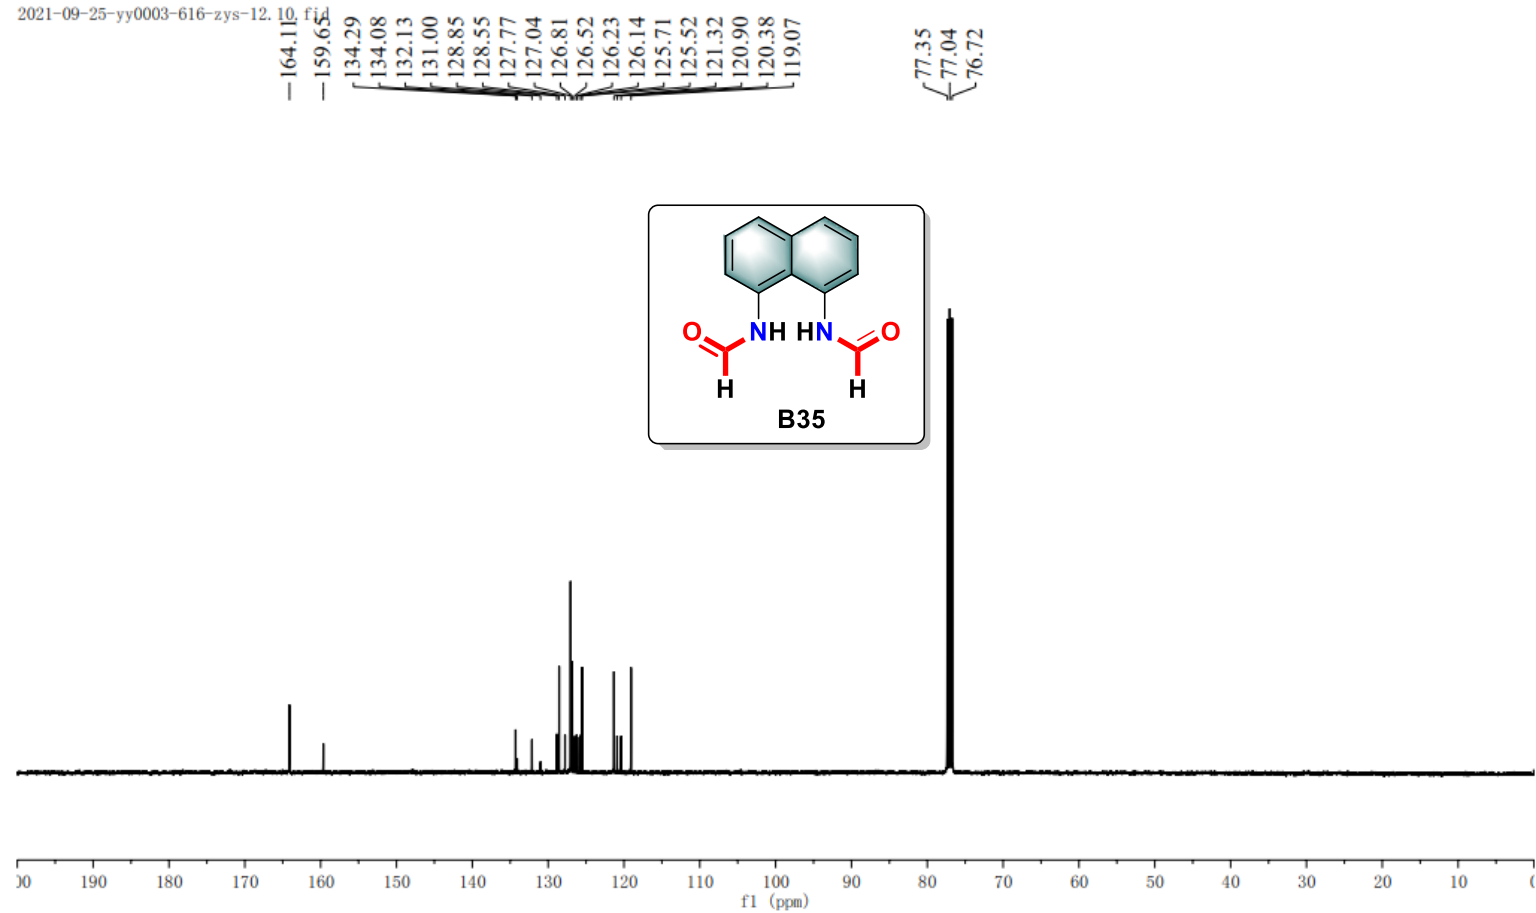

2021-10-08 YY0025 616-zz-32

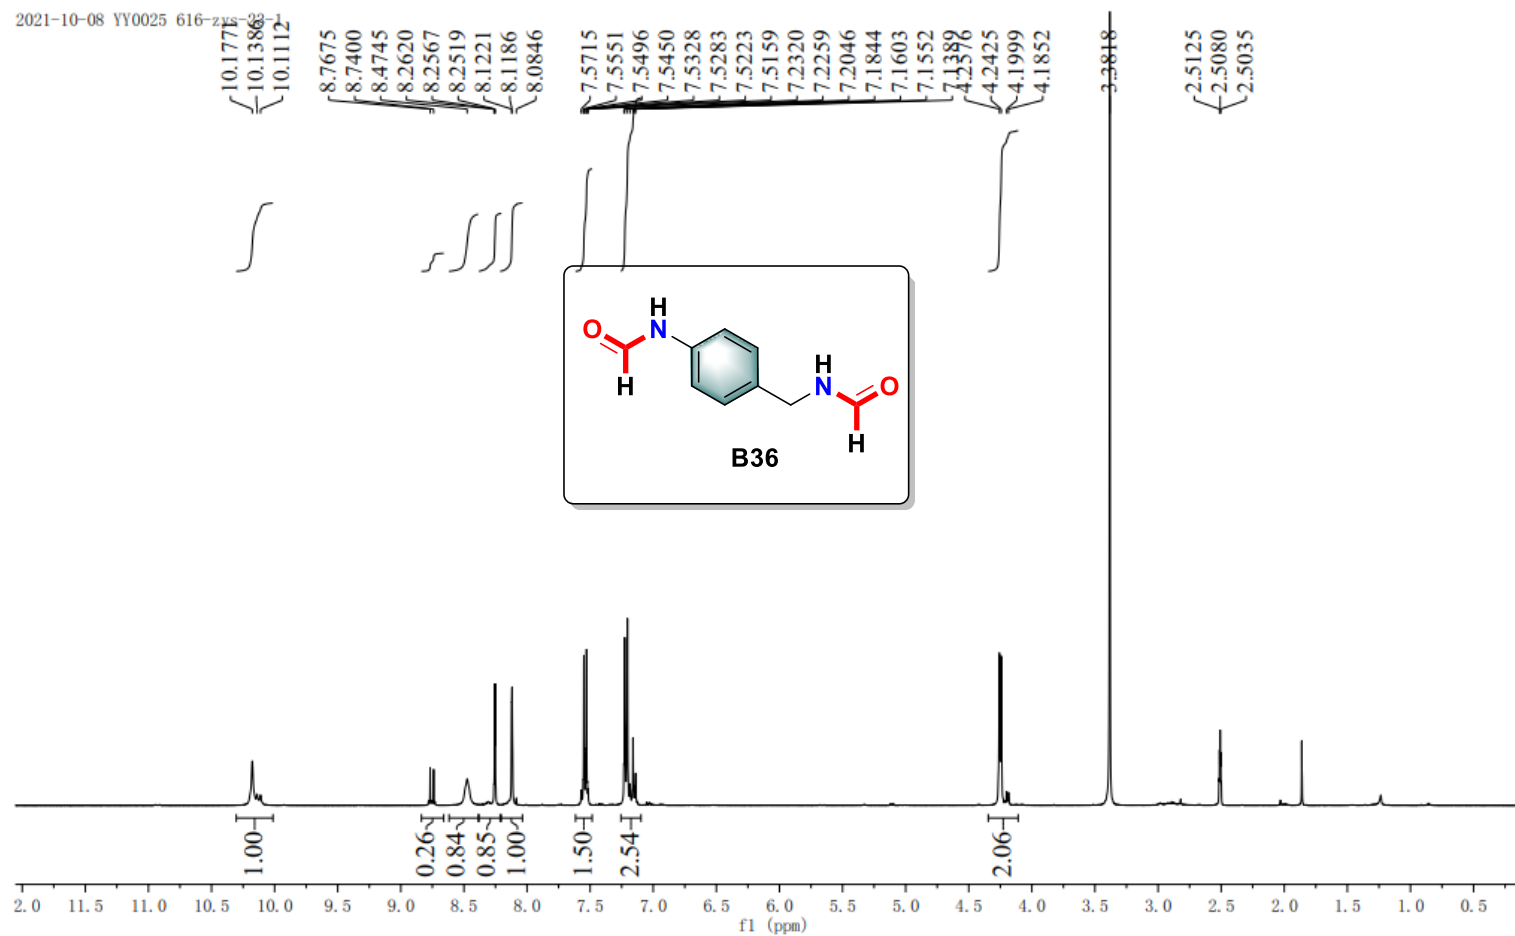

2021-10-12 YY0039 616-zys-23-1-10.fid

165.30  
162.97  
161.44  
159.96

137.49  
134.62  
128.90  
128.33  
119.55  
117.99

40.78  
40.69  
40.58  
40.37  
40.16  
39.95  
39.74  
39.54  
39.33

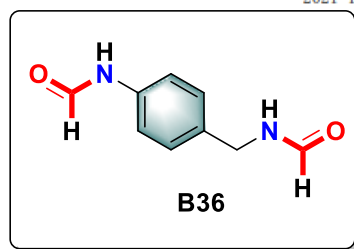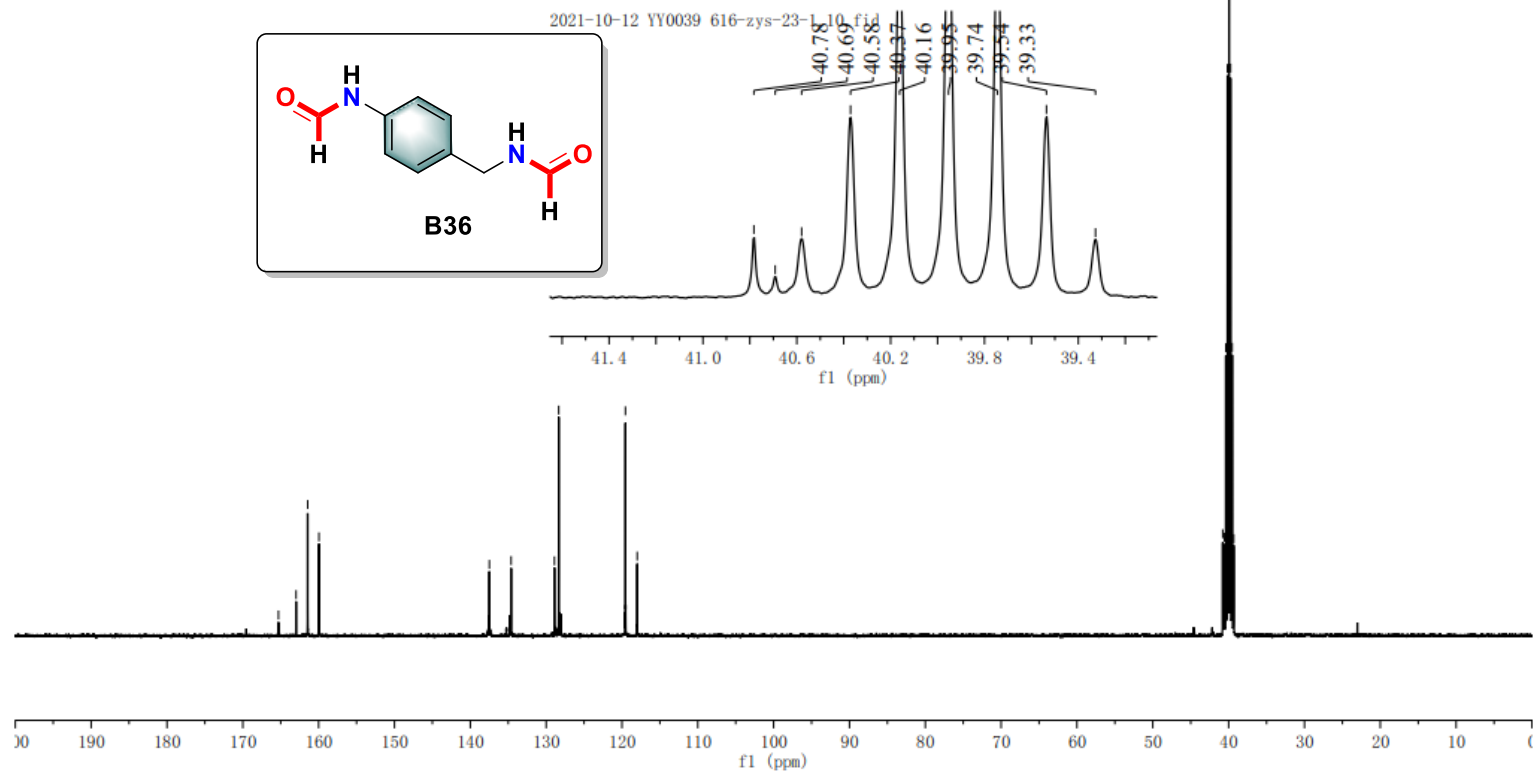

2021-09-28-yy0005-616-zys-26\_10.fid

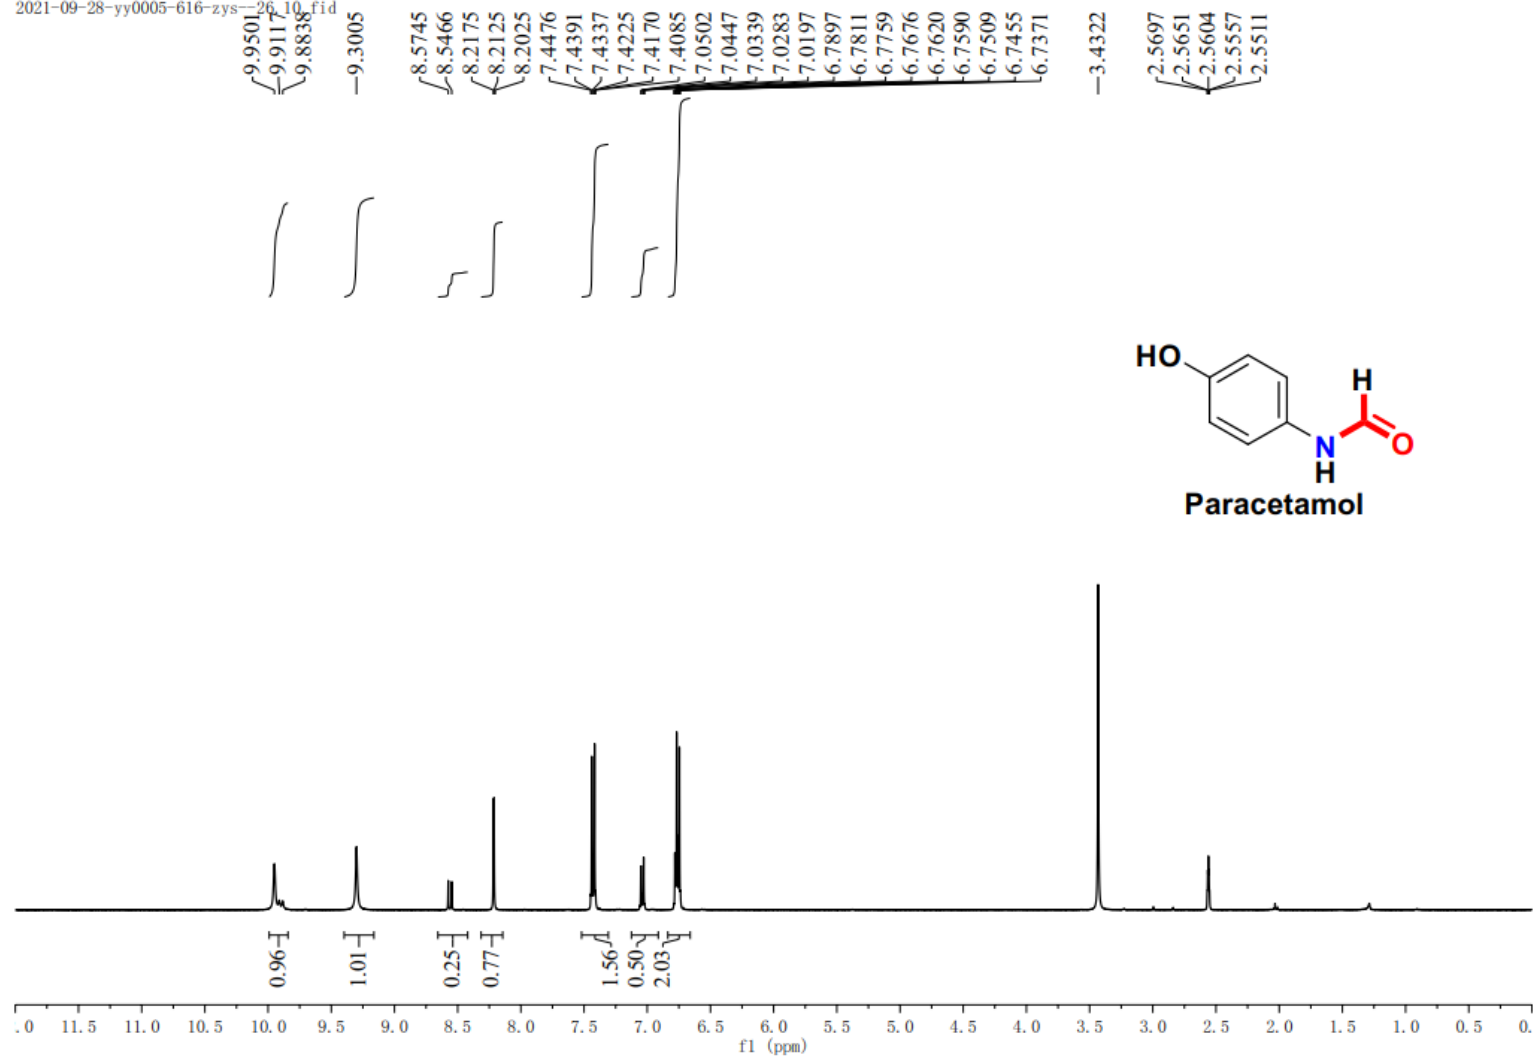

2021-10-08 YY0002 616-zys-26.10.fid

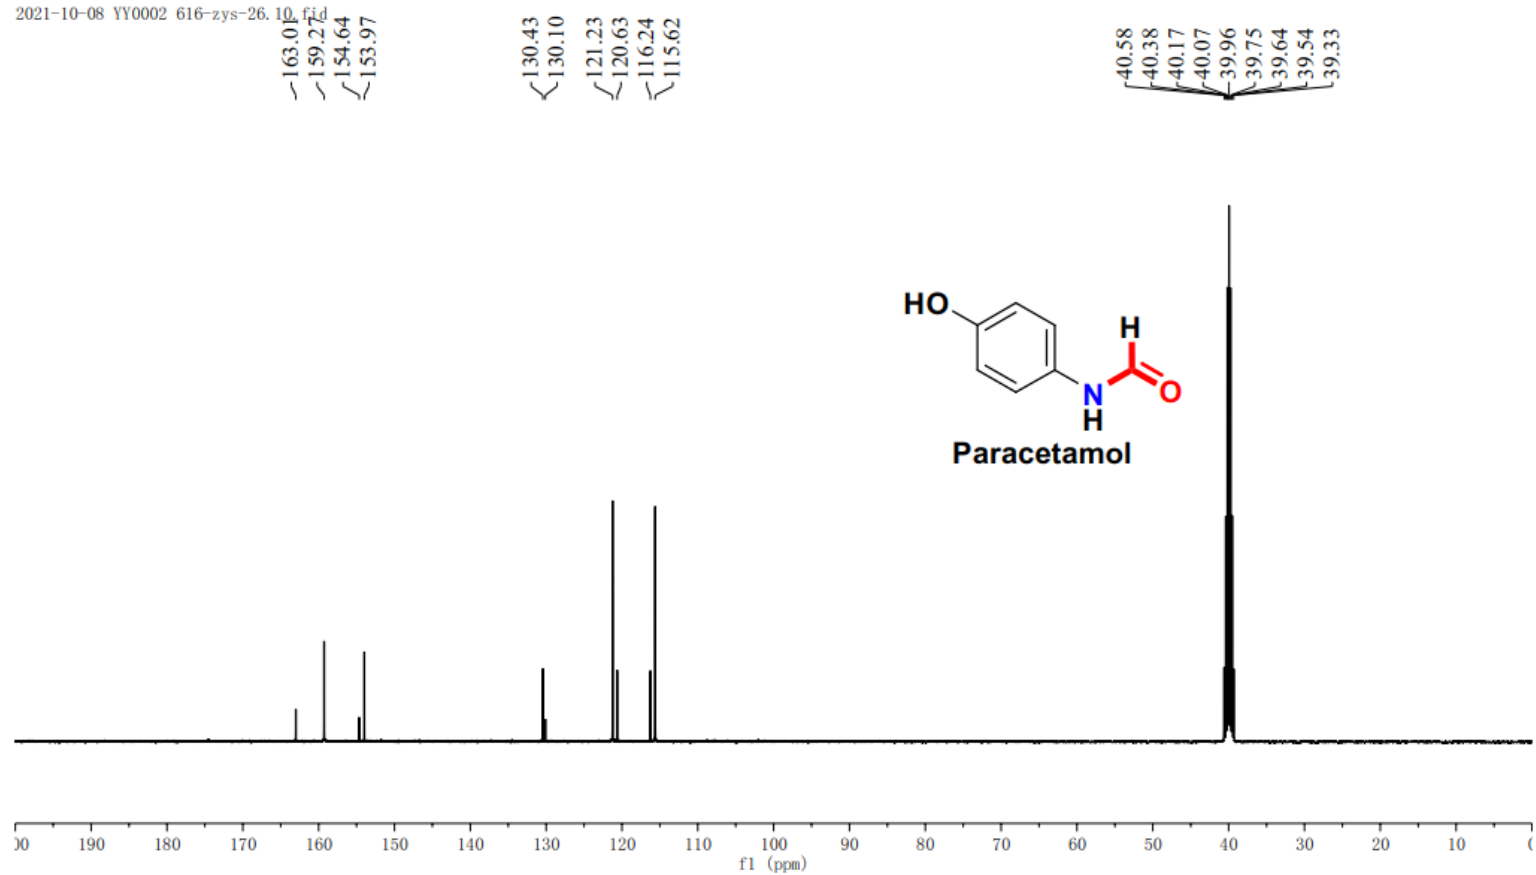

Supplement: d2qo01312f1.pdf [file d2qo01312f1.pdf]
